# Supplementary material for: Comprehensive identification and analysis of human accelerated regulatory DNA
Source: HighWire-hosted journal article supplement (doi:10.1101/gr.192591.115), 2015-06-23
Supplement: Supplemental_Figures_Legends.docx [file Supplemental_Figures_Legends.docx]

**Supplementary Figures**

**Fig. 1. Distribution of conservation and acceleration across DHS. (a)** The proportion of cell-type specific DHS (DHS that were active in only one cell type) that were called as conserved is shown for all 130 cell types. Cell types are colored according to category. Inset violin plot summarizes bar plot **(b)** The proportion of conserve DHS that were called as human-accelerated is shown for all 130 cell types. Cell types are colored according to category. Inset shows data for each category combined in a violin plot. **(c)** The proportion of cell-type specific DHS that were called as human-accelerated is shown for all 130 cell types. Cell types are colored according to category. Only cell types with a proportion greater than zero are shown. Inset violin plot summarizes bar plot.

**Fig. 2. Number of cell types each haDHS is active in.** All 524 haDHS are shown along the x axis, ranked from completely cell type specific to active in all or nearly all cell types. The range on the Y-axis exceeds the number of cell types analyzed (130), because in some cases multiple DHS from the same cell type were merged.

**Fig. 3. Additional forces contributing to rate acceleration in haDHS and HAEs. (a)** The proportion of weak to strong substitutions in conserved DHS (consDHS), all haDHS, the set of haDHS that do not overlap regions predicted to experience GC-BGC (no BGC haDHS), and the set of haDHS that do overlap predicted regions of GC-BGC (GCB haDHS). **(b)** Mean and 95% bootstrap confidence intervals of human-macaque divergence in regions surrounding haDHS and HAEs that do or do not overlap predicted GC-BGC elements. Horizontal bars denote the 95% confidence interval of the mean human-macaque divergence for conserved DHS and phastCons elements.

**Fig. 4. Estimating the proportion of substitutions subject to positive selection. (a)** The bootstrapped 95% confidence interval for α is shown for different groups of elements. “Top” refers to elements that are evolving more rapidly than neutral, and do not overlap BGC regions. **(b)** Values of α for 104 simulations are shown for different mutation rate heterogeneity parameters. The mutation rate parameter denotes how much more rapidly the haDHS is evolving compared to the neutral region.

**Fig. 5. Nucleotide diversity across 1000 genomes populations**. Boxplots of the bootstrap estimates of the mean π is shown for each of the 1000 genomes populations, for different groups of elements, indicated in the figure legend. “Top” refers to elements that are evolving more rapidly than neutral, and do not overlap BGC regions.

**Fig. 6. Luciferase reporters that did not show enhancer activity.** (a)Luciferase data for all SKNMC tests in which neither allele acted as an enhancer is shown. The dashed line indicates the mean of the negative control replicates. (b) Luciferase data for all IMR90 tests that passed the 2500 Renilla threshold but did not act as enhancers is shown. The dashed line indicates the mean of the negative control replicates.

**Fig. 7. Segmenting long merged DHS. (a)** Schematic of segmenting. This DHS would get partitioned into two distinct DHS at the minimum, because the minimum number of cell types is less than half the previous maximum, and the rest of the region climbs by at least 5 DHS. **(b)** Segmenting of the NR2F2 region is shown as an example. **(c)** The size distribution of DHS before applying the partitioning algorithm and after is shown.

**Fig. 8. IMR90 raw data**. The ratio of firefly to renilla luciferase expression is plotted against raw renilla values. Colors indicate the date that each data point was collected.
