# Supplementary material for: Comprehensive identification and analysis of human accelerated regulatory DNA
Source: HighWire-hosted journal article supplement (doi:10.1101/gr.192591.115), 2015-06-23
Supplement: Supplemental_Table_1.xlsx [file Supplemental_Table_1.xlsx]

## Sheet: Sheet1
file	source	cell type	category	index	used in 2nd set
CD19-DS17281.hg19.hotspot.twopass.fdr0.01.merge.pks.bed	roadmap epigenomics	CD19	normal	0
CD20-DS17371.hg19.hotspot.twopass.fdr0.01.merge.pks.bed	roadmap epigenomics	CD20	normal	1
CD3_CordBlood-DS17706.hg19.hotspot.twopass.fdr0.01.merge.pks.bed	roadmap epigenomics	CD3_CordBlood	normal	2
CD4-DS17881.hg19.hotspot.twopass.fdr0.01.merge.pks.bed	roadmap epigenomics	CD4	normal	3
CD56-DS17189.hotspot.twopass.fdr0.01.merge.pks.bed	roadmap epigenomics	CD56	normal	4
CD8-DS17203.hotspot.twopass.fdr0.01.merge.pks.bed	roadmap epigenomics	CD8	normal	5
fAdrenal-DS12528.hotspot.twopass.fdr0.01.merge.pks.bed	roadmap epigenomics	fAdrenal	fetal	6
fIntestine_Lg-DS17313.hg19.hotspot.twopass.fdr0.01.merge.pks.bed	roadmap epigenomics	fIntestine_Lg	fetal	7
fIntestine_Sm-DS17092.hg19.hotspot.twopass.fdr0.01.merge.pks.bed	roadmap epigenomics	fIntestine_Sm	fetal	8
fMuscle_arm-DS17765.hg19.hotspot.twopass.fdr0.01.merge.pks.bed	roadmap epigenomics	fMuscle_arm	fetal	9
fMuscle_back-DS17850.hg19.hotspot.twopass.fdr0.01.merge.pks.bed	roadmap epigenomics	fMuscle_back	fetal	10
fMuscle_leg-DS20239.hg19.hotspot.twopass.fdr0.01.merge.pks.bed	roadmap epigenomics	fMuscle_leg	fetal	11
fPlacenta-DS20793.hg19.hotspot.twopass.fdr0.01.merge.pks.bed	roadmap epigenomics	fPlacenta	fetal	12
fSkin-DS10987.hg19.hotspot.twopass.fdr0.01.merge.pks.bed	roadmap epigenomics	fSkin	fetal	13
fSkin_fibro_abdomen-DS19561.hg19.hotspot.twopass.fdr0.01.merge.pks.bed	roadmap epigenomics	fSkin_fibro_abdomen	fetal	14
fSkin_fibro_back-DS19174.hg19.hotspot.twopass.fdr0.01.merge.pks.bed	roadmap epigenomics	fSkin_fibro_back	fetal	15
fSpinal_cord-DS20351.hg19.hotspot.twopass.fdr0.01.merge.pks.bed	roadmap epigenomics	fSpinal_cord	fetal	16
fSpleen-DS17448.hg19.hotspot.twopass.fdr0.01.merge.pks.bed	roadmap epigenomics	fSpleen	fetal	17
fStomach-DS17878.hg19.hotspot.twopass.fdr0.01.merge.pks.bed	roadmap epigenomics	fStomach	fetal	18
fTestes-DS18942.hg19.hotspot.twopass.fdr0.01.merge.pks.bed	roadmap epigenomics	fTestes	fetal	19
fThymus-DS20341.hg19.hotspot.twopass.fdr0.01.merge.pks.bed	roadmap epigenomics	fThymus	fetal	20
H1_P18-DS18873.hg19.hotspot.twopass.fdr0.01.merge.pks.bed	roadmap epigenomics	H1_P18	pluripotent	21
H9_P42-DS18522.hg19.hotspot.twopass.fdr0.01.merge.pks.bed	roadmap epigenomics	H9_P42	pluripotent	22
iPS_19_11-DS15153.hotspot.twopass.fdr0.01.merge.pks.bed	roadmap epigenomics	iPS_19_11	pluripotent	23
iPS_19_7-DS15148.hotspot.twopass.fdr0.01.merge.pks.bed	roadmap epigenomics	iPS_19_7	pluripotent	24
iPS_4_7-DS15169.hotspot.twopass.fdr0.01.merge.pks.bed	roadmap epigenomics	iPS_4_7	pluripotent	25
iPS_6_9-DS15164.hotspot.twopass.fdr0.01.merge.pks.bed	roadmap epigenomics	iPS_6_9	pluripotent	26
NPC-DS20153.hg19.hotspot.twopass.fdr0.01.merge.pks.bed	roadmap epigenomics	NPC	pluripotent	27
FETAL_HEART-DS16582.hotspot.twopass.fdr0.01.merge.pks.bed	roadmap epigenomics	FETAL_HEART	fetal	28	yes
BREAST_vHMEC-DS18438.hg19.hotspot.twopass.fdr0.01.merge.pks.bed	roadmap epigenomics	BREAST_vHMEC	malignant	29	yes
FETAL_KIDNEY-DS16805.hotspot.twopass.fdr0.01.merge.pks.bed	roadmap epigenomics	FETAL_KIDNEY	fetal	30	yes
MOBILIZED_CD34_PRIMARY_CELLS-DS12734.hotspot.twopass.fdr0.01.merge.pks.bed	roadmap epigenomics	CD34_PRIMARY	normal	31	yes
H1_BMP4_DERIVED_MESENDODERM_CULTURED_CELLS-DS19310.hg19.hotspot.twopass.fdr0.01.merge.pks.bed	roadmap epigenomics	H1_BMP4_MESENDODERM	fetal	32	yes
CD3_PRIMARY_CELLS-DS17198.hotspot.twopass.fdr0.01.merge.pks.bed	roadmap epigenomics	CD3_PRIMARY	normal	33	yes
PENIS_FORESKIN_FIBROBLAST_PRIMARY_CELLS-DS18256.hg19.hotspot.twopass.fdr0.01.merge.pks.bed	roadmap epigenomics	FIBROBLAST	normal	34	yes
FETAL_LUNG-DS12817.hotspot.twopass.fdr0.01.merge.pks.bed	roadmap epigenomics	FETAL_LUNG	fetal	35	yes
IMR90-DS13219.hotspot.twopass.fdr0.01.merge.pks.bed	roadmap epigenomics	IMR90	normal	36	yes
PENIS_FORESKIN_KERATINOCYTE_PRIMARY_CELLS-DS18692.hg19.hotspot.twopass.fdr0.01.merge.pks.bed	roadmap epigenomics	KERATINOCYTE	normal	37	yes
FETAL_BRAIN-DS11872.hotspot.twopass.fdr0.01.merge.pks.bed	roadmap epigenomics	FETAL_BRAIN	fetal	38	yes
HRCE-DS10666.hotspot.twopass.fdr0.01.merge.pks.wig	ENCODE	HRCE	normal	39
HMVEC_dNeo-DS12937.hotspot.twopass.fdr0.01.merge.pks.wig	ENCODE	HMVEC_dNeo	normal	40
NHA-DS12800.hotspot.twopass.fdr0.01.merge.pks.wig	ENCODE	NHA	normal	41	yes
HPAEC-DS12916.hg19.hotspot.twopass.fdr0.01.merge.pks.wig	ENCODE	HPAEC	normal	42
HRGEC-DS13716.hotspot.twopass.fdr0.01.merge.pks.wig	ENCODE	HRGEC	fetal	43
HMEC-DS8680.hotspot.twopass.fdr0.01.merge.pks.wig	ENCODE	HMEC	normal	44	yes
AoAF-DS13523.hotspot.twopass.fdr0.01.merge.pks.wig	ENCODE	AoAF	normal	45
HAc-DS14765.hotspot.twopass.fdr0.01.merge.pks.wig	ENCODE	HAc	fetal	46
AG04449-DS12319.hotspot.twopass.fdr0.01.merge.pks.wig	ENCODE	AG04449	fetal	47
HNPCEpiC-DS12467.hotspot.twopass.fdr0.01.merge.pks.wig	ENCODE	HNPCEpiC	fetal	48
CD20-DS17541.hg19.hotspot.twopass.fdr0.01.merge.pks.wig	ENCODE	CD20.2	normal	49
HUVEC-DS10060.hotspot.twopass.fdr0.01.merge.pks.wig	ENCODE	HUVEC	normal	50	yes
hTH2-DS7842.hotspot.twopass.fdr0.01.merge.pks.wig	ENCODE	hTH2	normal	51
AG09309-DS12352.hotspot.twopass.fdr0.01.merge.pks.wig	ENCODE	AG09309	normal	52
SkMC-DS11949.hotspot.twopass.fdr0.01.merge.pks.wig	ENCODE	SkMC	fetal	53
HIPEpiC-DS12684.hotspot.twopass.fdr0.01.merge.pks.wig	ENCODE	HIPEpiC	fetal	54
HMVEC_dLyAd-DS13261.hotspot.twopass.fdr0.01.merge.pks.wig	ENCODE	HMVEC_dLyAd	normal	55
PrEC-DS12098.hg19.hotspot.twopass.fdr0.01.merge.pks.wig	ENCODE	PrEC	normal	56
HAh-DS15192.hotspot.twopass.fdr0.01.merge.pks.wig	ENCODE	HAh	fetal	57
BJ-DS10081.hotspot.twopass.fdr0.01.merge.pks.wig	ENCODE	BJ	normal	58
HMVEC_dBlNeo-DS13242.hotspot.twopass.fdr0.01.merge.pks.wig	ENCODE	HMVEC_dBlNeo	normal	59
HMVEC_dBlAd-DS13337.hotspot.twopass.fdr0.01.merge.pks.wig	ENCODE	HMVEC_dBlAd	normal	60
WI_38-DS14315.hotspot.twopass.fdr0.01.merge.pks.wig	ENCODE	WI_38	fetal	61
HFF-DS15115.hotspot.twopass.fdr0.01.merge.pks.wig	ENCODE	HFF	normal	62
RPTEC-DS14061.hotspot.twopass.fdr0.01.merge.pks.wig	ENCODE	RPTEC	normal	63
HPF-DS13390.hotspot.twopass.fdr0.01.merge.pks.wig	ENCODE	HPF	fetal	64
HPAF-DS13411.hotspot.twopass.fdr0.01.merge.pks.wig	ENCODE	HPAF	fetal	65
HCF-DS12501.hotspot.twopass.fdr0.01.merge.pks.wig	ENCODE	HCF	fetal	66
HCFaa-DS13480.hotspot.twopass.fdr0.01.merge.pks.wig	ENCODE	HCFaa	normal	67
HCM-DS12599.hotspot.twopass.fdr0.01.merge.pks.wig	ENCODE	HCM	fetal	68
HMVEC_LLy-DS13185.hotspot.twopass.fdr0.01.merge.pks.wig	ENCODE	HMVEC_LLy	normal	69
HSMM-DS14426.hotspot.twopass.fdr0.01.merge.pks.wig	ENCODE	HSMM	normal	70	yes
AG09319-DS12291.hotspot.twopass.fdr0.01.merge.pks.wig	ENCODE	AG09319	normal	71
HGF-DS11752.hotspot.twopass.fdr0.01.merge.pks.wig	ENCODE	HGF	normal	72
NHDF_Neo-DS11923.hotspot.twopass.fdr0.01.merge.pks.wig	ENCODE	NHDF_Neo	normal	73
HMVEC_dLyNeo-DS13150.hotspot.twopass.fdr0.01.merge.pks.wig	ENCODE	HMVEC_dLyNeo	normal	74
HMF-DS13363.hotspot.twopass.fdr0.01.merge.pks.wig	ENCODE	HMF	normal	75
HSMM_D-DS15538.hg19.hotspot.twopass.fdr0.01.merge.pks.wig	ENCODE	HSMM_D	normal	76
hTH1-DS7840.hotspot.twopass.fdr0.01.merge.pks.wig	ENCODE	hTH1	normal	77
HAEpiC-DS12663.hotspot.twopass.fdr0.01.merge.pks.wig	ENCODE	HAEpiC	fetal	78
HAsp-DS14790.hotspot.twopass.fdr0.01.merge.pks.wig	ENCODE	HAsp	fetal	79
AG04450-DS12270.hotspot.twopass.fdr0.01.merge.pks.wig	ENCODE	AG04450	fetal	80
HEEpiC-DS12763.hotspot.twopass.fdr0.01.merge.pks.wig	ENCODE	HEEpiC	fetal	81
SAEC-DS10518.hotspot.twopass.fdr0.01.merge.pks.wig	ENCODE	SAEC	normal	82
NHLF-DS12829.hotspot.twopass.fdr0.01.merge.pks.wig	ENCODE	NHLF	normal	83	yes
HVMF-DS13981.hotspot.twopass.fdr0.01.merge.pks.wig	ENCODE	HVMF	fetal	84
HCPEpiC-DS12447.hotspot.twopass.fdr0.01.merge.pks.wig	ENCODE	HCPEpiC	fetal	85
NHEK-DS11474.hotspot.twopass.fdr0.01.merge.pks.wig	ENCODE	NHEK	normal	86	yes
HBMEC-DS13817.hotspot.twopass.fdr0.01.merge.pks.wig	ENCODE	HBMEC	fetal	87
WI_38_TAM-DS14323.hotspot.twopass.fdr0.01.merge.pks.wig	ENCODE	WI_38_TAM	fetal	88
NHDF_Ad-DS12863.hotspot.twopass.fdr0.01.merge.pks.wig	ENCODE	NHDF_Ad	normal	89
HMVEC_dAd-DS12957.hg19.hotspot.twopass.fdr0.01.merge.pks.wig	ENCODE	HMVEC_dAd	normal	90
HConF-DS11642.hotspot.twopass.fdr0.01.merge.pks.wig	ENCODE	HConF	fetal	91
HPdLF-DS13573.hotspot.twopass.fdr0.01.merge.pks.wig	ENCODE	HPdLF	normal	92
HMVEC_LBl-DS13372.hotspot.twopass.fdr0.01.merge.pks.wig	ENCODE	HMVEC_LBl	normal	93
AG10803-DS12384.hotspot.twopass.fdr0.01.merge.pks.wig	ENCODE	AG10803	normal	94
HRE-DS10641.hotspot.twopass.fdr0.01.merge.pks.wig	ENCODE	HRE	normal	95
HRPEpiC-DS12583.hotspot.twopass.fdr0.01.merge.pks.wig	ENCODE	HRPEpiC	fetal	96
SKNSH-DS8482.hotspot.twopass.fdr0.01.merge.pks.wig	ENCODE	SKNSH	malignant	97
wgEncodeOpenChromDnaseHelas3Ifna4hAlnAllReps.30000000.hotspot.twopass.fdr0.01.merge.pks.wig	ENCODE	Helas3Ifna4h	malignant	98
PANC1-DS9955.hotspot.twopass.fdr0.01.merge.pks.wig	ENCODE	PANC1	malignant	99
CACO2-DS8235.hotspot.twopass.fdr0.01.merge.pks.wig	ENCODE	CACO2	malignant	100
Ishikawa_E_AllReps.30000000.hotspot.twopass.fdr0.01.merge.pks.wig	ENCODE	Ishikawa_E	malignant	101
HL60-DS11809.hotspot.twopass.fdr0.01.merge.pks.wig	ENCODE	HL60	malignant	102
NT2_D1-DS14575.hg19.hotspot.twopass.fdr0.01.merge.pks.wig	ENCODE	NT2_D1	malignant	103
wgEncodeOpenChromDnaseMedulloAlnAllReps.30000000.hotspot.twopass.fdr0.01.merge.pks.wig	ENCODE	Medullo	malignant	104
wgEncodeOpenChromDnaseT47dAlnAllReps.30000000.hotspot.twopass.fdr0.01.merge.pks.wig	ENCODE	T47d	malignant	105
LNCap-DS14684.hotspot.twopass.fdr0.01.merge.pks.wig	ENCODE	LNCap	malignant	106
HCT116-DS13551.hotspot.twopass.fdr0.01.merge.pks.wig	ENCODE	HCT116	malignant	107
wgEncodeOpenChromDnaseLncapAndroAlnAllReps.30000000.hotspot.twopass.fdr0.01.merge.pks.wig	ENCODE	LncapAndro	malignant	108
wgEncodeOpenChromDnaseMcf7HypoxlacAlnAllReps.30000000.hotspot.twopass.fdr0.01.merge.pks.wig	ENCODE	Mcf7Hypoxlac	malignant	109
HepG2-DS7764.hotspot.twopass.fdr0.01.merge.pks.wig	ENCODE	HepG2	malignant	110	yes
CMK-DS12393.hotspot.twopass.fdr0.01.merge.pks.wig	ENCODE	CMK	malignant	111
MCF7-DS9445.hotspot.twopass.fdr0.01.merge.pks.wig	ENCODE	MCF7	malignant	112
K562-DS9767.hotspot.twopass.fdr0.01.merge.pks.wig	ENCODE	K562	malignant	113	yes
wgEncodeOpenChromDnaseCllAlnAllReps.30000000.hotspot.twopass.fdr0.01.merge.pks.wig	ENCODE	Cll	malignant	114
NB4-DS12543.hotspot.twopass.fdr0.01.merge.pks.wig	ENCODE	NB4	malignant	115
SK_N_MC-DS14408.hotspot.twopass.fdr0.01.merge.pks.wig	ENCODE	SK_N_MC	malignant	116
wgEncodeOpenChromDnase8988tAlnAllReps.30000000.hotspot.twopass.fdr0.01.merge.pks.wig	ENCODE	8988t	malignant	117
WERI_Rb1-DS13681.hotspot.twopass.fdr0.01.merge.pks.wig	ENCODE	WERI_Rb1	malignant	118
Jurkat-DS12659.hotspot.twopass.fdr0.01.merge.pks.wig	ENCODE	Jurkat	malignant	119
A549-DS14289.hotspot.twopass.fdr0.01.merge.pks.wig	ENCODE	A549	malignant	120
HFF_MyC-DS15079.hotspot.twopass.fdr0.01.merge.pks.wig	ENCODE	HFF_MyC	malignant	121
Ishikawa_T_AllReps.30000000.hotspot.twopass.fdr0.01.merge.pks.wig	ENCODE	Ishikawa_T	malignant	122
Hela-DS10011.hotspot.twopass.fdr0.01.merge.pks.wig	ENCODE	Hela	malignant	123
wgEncodeOpenChromDnaseGlioblaAlnAllReps.30000000.hotspot.twopass.fdr0.01.merge.pks.wig	ENCODE	Gliobla	malignant	124
BE_2_C-DS14625.hotspot.twopass.fdr0.01.merge.pks.wig	ENCODE	BE_2_C	malignant	125
wgEncodeOpenChromDnaseH9esAlnAllReps.30000000.hotspot.twopass.fdr0.01.merge.pks.wig	ENCODE	H9es	pluripotent	126
hESCT0-DS11909.hotspot.twopass.fdr0.01.merge.pks.wig	ENCODE	hESCT0	pluripotent	127
HESC-DS10167.hotspot.twopass.fdr0.01.merge.pks.wig	ENCODE	HESC	pluripotent	128
wgEncodeOpenChromDnaseH1hescAlnAllReps.30000000.hotspot.twopass.fdr0.01.merge.pks.wig	ENCODE	H1hesc	pluripotent	129	yes
wgEncodeOpenChromDnaseIpsAlnAllReps.30000000.hotspot.twopass.fdr0.01.merge.pks.wig	ENCODE	Ips	pluripotent	130
