# Supplementary material for: Comprehensive identification and analysis of human accelerated regulatory DNA
Source: HighWire-hosted journal article supplement (doi:10.1101/gr.192591.115), 2015-06-23
Supplement: Supplemental_Table_2.xlsx [file Supplemental_Table_2.xlsx]

## Sheet: Sheet1
chr	start	stop	lnL human acceleration	lnL primate conservation	p value human acceleration	p value primate conservation	phastBias?	lucferase number	cell types
chr8	1649165	1649870	81.7714	32.6244	0	0	phastBias		126;100;130;27;7;87;14;80;97;114;17;21;22;38;32;29;121;3;66;26;106;95;128;74;45;36;112;25;63;94;24;54;60;111;23;96;72;115;2;127;73;49;35;86;40;64;34;31;28;59;69;103;78;89;41;9;10;5;27;102;11;82;30;1;105;129;68;91;15;6;0;33;83;62;81;18;93;4;8;65;107;19;20;120;71;109;126;108;117;130;113;85;37;44;119;77;48;100;76;51;39;75;16;99;49
chr7	3682200	3682370	27.2759	16.2915	0	0			73;78
chr3	11641980	11642395	25.6812	18.3715	0	0			118;15;16;14;9;125;73;35;64;84;8;58;28;17;92;55;10;89;18;19;121;54;48;13;47;79;62;94;117;104;71;61;80;93;68;88;40;85;36;70;96;87;30;69;52;66;6;1;57;45;67;59;110;75;43;83;120;74;11;101;122;26;44;95;91;63;90;42;56;20;103;76;60;130;105;129;22;78;123;112;12;72;27;50;99;29;7;34;53;65;39;124;46;25;100;107;41;82;21;126;128;24;23;127;81;116;102;106;37;86;32;109;22;8;117
chr9	3968920	3969210	19.6876	11.5352	0	0	phastBias	1	14;67;87;45;48;120;61;88;83;41;36;75;57;81;96;63;121;15;56;107;82;44;99;95;39;29;37;110;86
chr10	127190180	127190350	18.8409	5.16675	0	0.00065			11;13;10
chr7	9304080	9304315	18.3798	8.5726	0	2e-05			23;26;109;25;106;125;105
chr2	236773805	236774115	15.4092	32.8362	0	0	phastBias	2	129;38;30;117;96;115;130
chr3	2783280	2783850	15.0835	5.34825	0	0.00054	phastBias		30;19;35;11;84;13;9;13;17;126;16
chr14	37608120	37608470	14.8593	23.7454	0	0			10;70;89;9;10
chr18	908420	909170	14.6353	4.50669	0	0.00134	phastBias		26;27;85;46;117;21;92;31;105;22;87;105;79;19;57;69;43;38;126;16;104;129;108;9;30
chr3	170819800	170820100	14.4444	11.9965	0	0	phastBias		48;54;61;124;29;73;70;80;85;65;81;47;89;107;58;76;83;79;64;82;34;94;53;75;62;88;68;46;95;78;87;36;67;15;92;41;14;45;37;44;57;39;84;86;121;63
chr1	103345220	103345450	13.625	30.7952	0	0			79;55;54;99;121;123;107;41;62;46;87;74;125;70;91;68;36;81;75;92;124;67;15;95;84;48;37;76;82;85;86;53;66;69;98;90;12;93;120;34;14;94;78;32;96;56;83;29;52;72;50;80;63;58;45;47;65;39;128;44;89;57;43
chr10	234780	235210	13.624	12.5618	0	0	phastBias		43;93;60;74
chr10	80423600	80423770	12.9617	17.5309	0	0			16;38
chr6	2396360	2396830	12.9149	21.5038	0	0	phastBias		106;16;35;11;38;10;108;119;107;117;130;109;105;11;9;21;24
chr9	98811345	98812075	12.6218	32.5297	0	0		5	129;104;76;100;30;13;100;10;8;108;16;38;18;106;11;9;130
chr2	147187000	147187170	12.6006	18.062	0	0			25;32;127
chr5	91951840	91952110	12.5674	13.2134	0	0			127;78;32;97
chrX	137792645	137793565	12.5084	35.307	0	0	phastBias		122;35;101;109;57;9;19;32;38;10;28;27;26;23;22;9;21;103;27;126;109;122
chr17	33395320	33395870	12.1069	12.4961	0	0			77;119;104;39;77;63;105;8;85;54;59;53;93;74;60
chr9	101866180	101866525	12.0075	19.5616	0	0		6	113;79;12;75;71;94;60;92;3;84;14;66;83;73;6;18;121;52;48;33;89;81;61;47;65;36;10;91;41;58;88;42;11;86;59;85;54;62;87;72;53;16;105;124;82;70;9;38;34;116;51;4
chr1	116854360	116854940	11.9868	10.7416	0	0			11;18;20;109;119;35;96;27;70;76;10;19;28;122;9;101;30;24;7;109;108;18;106;105;112;8;37;12;13;107;1;81;35
chr2	237776600	237776890	11.8663	14.5863	0	0			61;89;47;62;41;83;92;73;52;53;58;9;121;81;72;14;94;24;34;71;88;87;15;82;17;43;116;25;56;23;86;44;37;128;103;10;48;22;32;127;21;30;112;26
chr3	141883300	141883515	11.4232	4.2644	0	0.00175			26;103;128;126
chr6	1287320	1287870	11.2473	13.6731	0	0	phastBias		78;98;30;95;79;18;123;8;35;29;107;124;81;12;37;3;98;56;63;117;102;82;1;85;44;86;115;39;72;120;96;34;4;66;91;61;87;52;48;15;53;75;88;121;54;46;78;94;83;73;64;95;71;68;14;92;84;47;89;41;67;80;57;99;70;62;58;36;45;124;65
chr12	108876280	108876740	11.2368	4.45011	0	0.00143			79;44;120;99;124;86;56;79;54;83;29;81;46;52;48;95;63;85;87;39;98;59;37;57;43;123;23
chr12	97931360	97931530	11.231	23.9812	0	0			38;16
chr2	119067240	119067880	11.2173	43.859	0	0	phastBias		43;16;79;13;116;87;54;96;27;32;104;46;127;70;28;25;19;63;116;128;93;57;18;126;22;55;53;103;24;9;37;129;4;60;10;65;111;26;95;81;21;41;130;16;20;11;34;30;69;90;113;33;44;3;100;40;19;5;38;74;77;75;42;8;76;117;82;51;2;50;0
chr17	5264465	5264710	11.127	13.5778	0	0	phastBias		104;49
chr2	113992940	113993455	11.0507	28.3012	0	0	phastBias		100;104;20;69;2;40;33;87;107;18;9;117;115;36;94;42;16;84;4;49;17;93;113;46;35;43;10;59;55;90;64;91;41;66;48;38;71;1;58;60;121;45;78;65;101;68;76;56;13;29;11;103;67;34;80;3;14;15;19;12;85;70;6;53;31;54;5;112;8;30;61;82;81;109;122;50;47;72;110;73;88;0;116;83;62;89;7;77;97;51;40;129;130
chr1	88393120	88393370	11.0503	21.8266	0	0			38;6
chr18	3499005	3499550	10.9967	33.4508	0	0	phastBias		104;22;129;20;6;108;105;52;30;126;130;96;18;27;62;28;110;21;102;41;17;44;11;64;7;57;74;45;75;26;35;10;66;54;76;9;103;127;19;84;55;97;69;91;23;65;118;89;78;68;87;73;14;85;90;83;72;38;59;92;53;0;88;24;8;43;25;93;100;81;128;34;94;60;31;117;46;40;36;16;104;49;79
chr4	124317660	124318050	10.883	9.27693	0	1e-05			79;0;98;130;90;89;17;15;70;50;27;21;99;92;49;37;2;4;43;61;8;41;29;13;12;20;126;117;108;122;75;22;107;16;86;56;38;31;5;42;73;88;14;6;112;72;76;101;111;3;93;91;81;83;82;66;77;40;63;57;64;59;94;39;67;69;52;30;45;74;1;65;60;125;106;26;24;80;115;85;46;33;121;23;62;120;119;113;55;128;127;104;129;58;97;102;103;100;123;7;10;87;84;95;78;18;11;54;48;53;110;35;36;71;34;96;28;51;9;68;118;109;47;32;19;25;124;…
chr2	27716160	27716650	10.8821	11.4843	0	0			4;102;111;82;81;56;115
chr10	33735040	33735190	10.8622	16.7929	0	0			38
chr12	130765765	130766030	10.7645	8.24932	0	2e-05	phastBias		129;126;27;110;22;127;97;23;33;21;76;128;105;122;103;9;119;18;100;25;31;73;130;77;125;118;30;10;51;32;8;108;104;14;89;91;3
chr15	37242100	37242250	10.7456	8.16377	0	3e-05			83
chr21	15825740	15825930	10.5565	8.14757	0	3e-05	phastBias		51;77
chr11	124616780	124617190	10.5155	11.6484	0	0	phastBias		17;79;51;41;116;26;70;24;11;33;1;71;2;120;23;7;88;123;58;8;62;4;87;25;5;128;112;98;105;129;13;37;102;78;3;84;32;82;103;21;119;125;106;124;126;127;56;107;20;64;18;19;76;97;66;50;81;86;16;80;35;55;69;6;96;44;27;30;110;83;113;29;74;40;45;94;60;104;122;101;117;114;130;108;109;42;90;61;100;36;12;57;91;73;72;121;52;85;93;68;46;63;48;59;14;54;65;34;95;39;15;67;43
chr10	11077660	11077890	10.4259	19.48	0	0			40;50;22;74
chr3	2141600	2142075	10.371	4.42949	0	0.00146	phastBias		127;30;35;100;11;117;1;10;129;32;22;27;28;103;6;128;18;118;97;38;17;109
chr8	56805800	56806060	10.2905	8.0105	0	3e-05			55;5;17;46;0;33;114;82;18;124;56;49;2;31;4;40;96;69;29;99;87
chr18	42879000	42879290	10.2365	13.4316	0	0		9	128;23;127;30;38;24;16
chr1	87835465	87835710	10.2313	21.5788	0	0			104;28;127;125;96;97;84;32;78;118
chr12	114845100	114845780	10.1811	6.16872	0	0.00022			64;117;108;22;19;24;103;130;126;104;26;22;25;21
chr8	27752600	27753030	10.1046	9.40597	0	1e-05			10;71;19;16;9;11;72;13;30;18;91;104;118;73;121;103;125;127;89;26;97;27;34
chr8	72094400	72094550	10.0972	10.8319	0	0			9
chr9	82225960	82226320	10.0921	16.1173	0	0		10	88;121;124;95;25;32;37;79;76;61;78;58;54;70;87;39;36;84;83;96;67;80;62;29;47;48;63;85;14;15;34;91;27;41;52;75;57;115;72;24;89;92;125;46;127;53;94;73;128;71;13;65;30;45;66;16;103
chr10	126812845	126812995	10.0819	6.54403	0	0.00015			98
chr20	39513665	39513815	10.0661	6.08772	0	0.00024			104
chr7	4057880	4058030	9.89678	10.8562	0	0			6
chr14	33811460	33811810	9.84998	4.82887	0	0.00094	phastBias		25;128;127;23;24;101;122;32
chr18	33570460	33570610	9.80885	9.84507	0	0			16
chr3	56037220	56037530	9.78014	25.5321	0	0			9;11;83;10;13;57;28;41;53;91;46;19;30;79
chr4	141856440	141856690	9.77534	14.7343	0	0			65;30;41;72;16;57;28;83;35;14;62;19;10;38;73;8;121;89;122;52;96;11;17;46;76;1;79;58;71;48;13;106;18;70;9;101;97;6;125;53
chr3	159359220	159359370	9.62411	8.40927	1e-05	2e-05			16
chr9	71819680	71820175	9.62104	11.4476	1e-05	0			79;19;87;46;57;38;54;93;70;92;59;62;73;35;64;48;61;90;52;66;16;69;124;41;53;75;95;29;36;68;42;83;80;71;45;81;40;74;55;88;27;89;65;14;24;37;60;72;94;67;103;15;25;34;121;76;26;44;23;127;32;130
chr3	81267645	81267795	9.60267	7.92939	1e-05	3e-05			104
chr4	11691180	11691330	9.58861	13.9459	1e-05	0			6
chr14	85124220	85124670	9.51808	39.2535	1e-05	0			11;30;10;57;48;15;32
chr9	469645	470020	9.47839	6.50365	1e-05	0.00016	phastBias		130;23;25;18;127;114;33;24;5;104;103;26;126;28;30;35;10;9;79
chr17	74908980	74909130	9.44122	10.6376	1e-05	0			13
chr1	194307560	194308050	9.43164	6.82423	1e-05	0.00011			38;14;41;77;57;83;37;44;29
chr10	4320380	4320750	9.40734	5.46565	1e-05	0.00047			58;89;84;64;73;52;34;53;70;65;66;96;35;28;12;118;76
chr3	52354240	52354470	9.27965	4.11415	1e-05	0.00206			97;56;100
chr4	81707620	81707890	9.13279	11.3727	1e-05	0			19;9
chr15	81822500	81822970	9.1023	4.94647	1e-05	0.00083			30;22;127;103;14;26;25;83;45;41
chr10	128956040	128956455	8.96495	22.5673	1e-05	0			34;62;79;64;52;28;121;96;73;14;58;9;35;30;17;118;104;18;13;19;106;108
chr5	158635020	158635355	8.96068	12.911	1e-05	0		12	0;50;90;102;25;116;26;17;61;48;84;31;19;107;10;121;6;119;51;2;59;115;120;4;126;114;62;22;8;9;28;27;23;20;35;106;49;5;30;18;42;15;37;78;14;83;53;89;113;117;122;98;128;60;96;111;68;125;110;7;127;93;36;69;118;129;124;108;130;13;24;33;95;11;123;32;46;74;77;91;88;21;52;38;80;40;65;75;3;103;76;97;85;1;55;41;71;100;66;92;54;47;64;63;87;94;16;109;12;81;56;72;73;44;34;105;57;45;104
chr3	89536540	89536690	8.93921	5.15004	1e-05	0.00067			78
chr9	16729200	16729570	8.89653	33.6907	1e-05	0			63;67;121;19
chr1	71184680	71185270	8.87476	5.84678	1e-05	0.00031			9;58;70;11;92;116;10;52;71;13;89;28;73;18;45;35;19;84;1;94
chr4	4794040	4794190	8.87132	8.50001	1e-05	2e-05			14
chr15	77849020	77849790	8.82479	18.8437	1e-05	0			30;10;11;9;8;1;19;35;26;126;103;129;128;19;130;127;113;18;12;32;100;28
chr4	33264460	33264830	8.80736	5.40637	1e-05	0.0005			76;124;81;92;45;47;48;54;121;75;66;34;96;53;41;82;62;83;80;37;15;87;52;78;58;79;70;14
chr12	109692000	109692270	8.80467	9.67135	1e-05	1e-05			127;24;26;128;25;130;103;23;21
chr3	86986760	86986990	8.78181	23.4443	1e-05	0		14	12;80;19;9;92;88;67;10;116;14;73;87;70;81;54;85;52;72;61;94;83;35;36;78;44
chr1	97463380	97463550	8.77642	12.2185	1e-05	0			6;28;125
chr16	64803220	64803370	8.77145	5.87161	1e-05	0.00031			27
chr2	135118260	135118550	8.76123	5.40104	1e-05	0.00051			45;46;6;10;11;90;18;9;65;16;97;66;38;35;57;68;76;69;125;28;40;55
chr18	3214860	3215270	8.72089	15.4898	1e-05	0	phastBias		128;117;26;130;99
chr2	238224260	238224490	8.63958	4.67525	2e-05	0.00111			47;18;121;10;13;62;125;80;94;88;64;65;61;75;30;52;14;68;35;16;73;1;8;38;84;11;66;36;89;45
chr1	91286480	91286630	8.633	8.94717	2e-05	1e-05			13
chr2	145234920	145235190	8.62405	17.6805	2e-05	0			80;58;61;78;84;15;87;45;72;70;83;54;66;46;48;121;73;64;47;92;52;62;68;14;85;94;71;36;35;41;57;9;96;30;53;79
chr8	32065060	32065395	8.58367	20.0251	2e-05	0		15	125;116;101
chr16	85399600	85400330	8.55987	18.4177	2e-05	0	phastBias	16	23;100;24;21;129;26;126;25;22;130;76;16;97;30;38;6;9;28;10;11;84;110;19;57;64;1;125;35;85;104;82;17;81;18;34;79;130;105;87;127;126;129;103;116;32;125
chr15	91009460	91009795	8.53265	7.09292	2e-05	8e-05			94;52;72;76;70;34;104
chr15	34030260	34030735	8.42475	9.01799	2e-05	1e-05			13;25;39;22;24;21;34;76;35;127;48;85;46;81;12;105;56;109
chr11	107364840	107365090	8.34704	4.77665	2e-05	0.001			95;101;105;13;122;63;112;39
chr8	76636560	76636835	8.34346	31.1528	2e-05	0			16;38;104
chr3	55577180	55577630	8.31572	15.0435	2e-05	0			13;78;16;84;85;11;18;79;88;9;30;95;52;87;84
chr3	101569620	101569950	8.31264	4.82423	2e-05	0.00095			88;31;9;20;111;0;115;124;29;47;82;1;3;37;5;74;48;57;78;2;49;76;96;81;59;94;53;87;60;75;35;72;65;12;85;64;33;45;91;17;36;90;42;68;55;62;13;40;46;70;121;77;34;41;4;52;69;14;10;51;92;83;18;71;58;67;80;15;93;66;79;89;54;95;61;73;6;109;44
chr1	3285380	3285535	8.27572	6.51963	2e-05	0.00015			9;130;126
chr2	151644940	151645290	8.24587	6.19818	2e-05	0.00022			35;92;38;16;62
chr1	42166820	42167010	8.20137	4.07487	3e-05	0.00215			37;56;29;103
chr1	244200840	244200990	8.17905	14.8306	3e-05	0			38
chr2	144483820	144483970	8.16721	21.0272	3e-05	0			38
chr10	123064660	123064910	8.15363	15.1672	3e-05	0		17	38;16;118
chr11	114099820	114100210	8.13029	55.0324	3e-05	0		18	27;79;9;6;118;16;38;57;105;18;13;125;30;35;96;104;11
chr6	164984980	164985290	8.09328	12.0241	3e-05	0			27;38;16;96;57;10;9
chr19	31154040	31154330	8.0629	10.6811	3e-05	0			13;30
chr2	208003340	208003890	8.05686	6.49751	3e-05	0.00016	phastBias		116;95;52;63;13;39;94;30;58;89;9;78;125
chr10	123914220	123914600	8.00411	13.6836	3e-05	0	phastBias	19	8;71;72;94;75;58;34;9;6;62;36;66;54;64;83;48;70;87;28;65;72;92;67;68;52;89;80;81;45;88;61;78;53;18;91;47;41;38;76;46;106;11;16;96;82;10;15;108;125;97
chr4	16813760	16814170	7.98167	9.27382	3e-05	1e-05			127;27;90;42;59;93;60;32;74;93;69;50;40
chr18	62504900	62505110	7.9812	4.80949	3e-05	0.00096			14;19
chr5	4570760	4571010	7.9356	20.2931	3e-05	0			29;128;32;27
chr18	68137920	68138170	7.92901	5.79134	3e-05	0.00033	phastBias		115;102
chr6	11607620	11608050	7.91972	8.29282	3e-05	2e-05			11;80;16;62;50;71;61;18;43;10;90;8;36;1;69;59;40;92;39;58;42;55;28;35;63;34;93;60;74;9;65;30;66;83;73;68;38;52;19;16;41;89;46;76;17;94;32;15;45;57;70;127
chr7	154412000	154412150	7.91129	6.10499	3e-05	0.00024			38
chr1	107292620	107292910	7.90481	7.65388	4e-05	5e-05			82;81;37;44;118
chr4	85395340	85395570	7.87939	23.4235	4e-05	0			30;13;106
chr11	17786920	17787230	7.83507	10.8702	4e-05	0			88;41;25;46;57;24;96;103;126;38;23;27;117;129;130;21;9;16;119;32;101;121
chr6	46012640	46012930	7.83135	4.65864	4e-05	0.00114			76;30;53;95;96;70;93;39;75;35;57;17;101;60;50
chr1	101490800	101491270	7.83121	6.82833	4e-05	0.00011			3;87;111;39;49;98;7;8;6;60;28;93;57;59;13;19;20;22;67;9;51;49;120;79;21;116
chr3	193801080	193801330	7.81137	8.806	4e-05	1e-05			9;10;70;11;76;53
chr10	70010900	70011355	7.75879	51.2254	4e-05	0			25;122;129;21;128;118;24;23;32;130;103;127;27;126;101;104;125;122
chr5	117901160	117901310	7.75023	5.20538	4e-05	0.00063			38
chr14	40133125	40133715	7.73307	9.47614	4e-05	1e-05			122;16;46;57;101;116;79;101
chr18	44068825	44069010	7.72838	6.40099	4e-05	0.00017			117;16;38
chr7	138969080	138969270	7.69353	31.1456	4e-05	0			32;24;112;109;119;127;22;25
chr9	603160	603470	7.67708	9.51843	4e-05	1e-05	phastBias		81;8;1
chr16	17812480	17812630	7.66327	6.76044	5e-05	0.00012			97
chr1	203336280	203336530	7.64177	10.9681	5e-05	0			18;16;38;11
chr8	19613780	19614220	7.62523	10.9029	5e-05	0			87;85;68;116;78;52;50;43;12;90;20;123;106;33;119;105;60;74;42;69;38;55;40;5;3;35;44;98;108;110;126;103;77;26;17;24;128;49;124;129;130;19;51;21
chr18	22657985	22658150	7.61584	23.9339	5e-05	0			130;27
chr15	96952460	96953100	7.60359	4.44952	5e-05	0.00143	phastBias		50;127;130;105;108;18;7;1;8;22;17;21;27;28;12;6;30;74;115;64;35;59;76;25;26;60;104;70;80;24;38;103;127;23;129;9;126;130;100
chr1	238497460	238497710	7.59611	7.2316	5e-05	7e-05			79;18
chr1	183746320	183746470	7.59091	5.52819	5e-05	0.00044			84
chr11	113936620	113937250	7.58612	8.82828	5e-05	1e-05			9;4;55;3;102;5;119;33;69
chr11	131852600	131852790	7.56905	5.23425	5e-05	0.00061			26;22
chr16	78471280	78471570	7.56446	13.4814	5e-05	0			55;25;54;1;10;28;102;64;19;86;5;63;18;26;13;89;84;81;99;74;68;23;27;17;30;42;4;76;69;12;59;105;108;104;101;21;93;9;103;2;127;33;109;117;129;111;124;130;122;119;85
chr18	73257060	73257390	7.5167	8.62283	5e-05	2e-05			116;19;9;68;78
chr18	45735100	45735390	7.49692	19.9067	5e-05	0			106;38;16
chr17	42215400	42215995	7.49374	4.06484	5e-05	0.00218			22;109;126;28;98;25;21;23;89;84;79;120;67;48;63;70;116;124;88;54;87;37;118;12;73;94;56;15;115;123;103;52;47;92;75;6;53;81;72;66;78;1;95;68;62;91;57;83;80;71;65;26;34;76;41;85;36;14;4;58;82;64;45;3;39;16;50;19;10;77;22;99;61;93;112;55;90;44;9;5;30;17;32;100;110;29;11;121;43;102;42;127;60;107;20;27;59;125;46;101;122;109;31;18;113;105;128;40;74;7;96;38;35;69;126;130;117;129;13;24;86;51;8;114
chr7	15582640	15582790	7.48242	8.30386	5e-05	2e-05			88
chr10	122945740	122945950	7.46987	12.6224	6e-05	0			9;35;30;11
chr6	91190720	91190910	7.46445	4.21264	6e-05	0.00185			59;116;93
chr18	38430800	38430950	7.43318	4.54008	6e-05	0.00129			123
chr13	107001720	107002090	7.42956	20.6831	6e-05	0			124;44;128;30;122;100;8;29;103;22;32;101;107;23;81;86;54;78;126;82;15;18;104;1;95;37;59;83;63;50;56;42;48;74;39;41;53;60;40;31;36;87;96;85;57;75;46;79;93;43
chr4	54809800	54810210	7.41874	10.2618	6e-05	0			35;73;96;61;71;107;88;78;81;63;95;37;121;93;48;39;8;76;84;38;15;34;56;123;14;16;29;122;47;94;60;58;41;97;7;62;116;44;75;52;82;1;68;43;70;83;99;42;79;86;74;65;54;57;59;40;36;55;69;67;125;85;80;91;17;66;18;72;53;87;89;45;46;90;64;50;9
chr15	33306860	33307070	7.38567	5.52905	6e-05	0.00044	phastBias		119;20
chr2	64067160	64067310	7.34946	6.63902	6e-05	0.00013			81
chr5	128988040	128988310	7.34811	4.08359	6e-05	0.00213			96;38;16;122;28;6;29;37;44;56;11;86;10;82;81
chr8	26087760	26088020	7.34424	13.4929	6e-05	0			9;107;121;103;25;116;113;128;23;127;32;118;1;26;24;104
chr1	176663120	176663435	7.34015	14.1176	6e-05	0			18;64;8;35;28;66;105
chr1	2928620	2929080	7.33732	15.4797	6e-05	0			38;16;10;9;13;11;6;30;57;108;35
chr8	89128940	89129090	7.33218	24.2705	6e-05	0			79
chr7	11765940	11766250	7.31519	6.81804	7e-05	0.00011			14;81;89;95;44;63;11;75;39;72;35;82;65;67;34;37;9;56;97;125;6
chr14	33180340	33180630	7.28184	4.37031	7e-05	0.00156			1;113;82;63;91;73;41;69;116;50;112;61;39;53;67;103;68;80;55;42;124;98;120;79;71;62;45;125;99;121;74;83;34;10;111;85;8;95;16;89;25;64;65;87;43;57;66;106;76;118;48;17;21;59;6;35;122;119;9;75;32;15;88;13;11;27;123;81;14;127;93;96;52;38;19;37;30;90;107;72;18;12;92;109;105;126;104;101;60;23;46;128;28;24;115;26;40;84
chr7	26765820	26765970	7.27854	20.1015	7e-05	0			38
chr7	69944180	69944510	7.26717	6.85065	7e-05	0.00011			8;7;1;4
chr1	246230840	246231550	7.25262	4.754	7e-05	0.00102	phastBias		19;114;91;13;103;17;125;84;73;18;61;121;62;89;65;14;80;71;41;68;35;53;30;4;34;36;47;92;58;96;88;31;85;64;52;72;11;94;48;76;15;9;20;83;70;14;92;88
chr3	61268940	61269090	7.24787	6.90751	7e-05	0.0001			38
chr1	200438420	200438690	7.24403	15.7049	7e-05	0			106;44
chr16	80155720	80155870	7.23488	18.0639	7e-05	0			97
chr3	127168440	127168630	7.23142	17.424	7e-05	0			38;32;16
chr16	59587760	59587930	7.2306	8.30513	7e-05	2e-05			58;62
chr4	130202780	130202930	7.22606	7.26416	7e-05	7e-05			28
chr15	70306080	70306390	7.215	14.2858	7e-05	0			30;13;116;30
chr5	158229000	158229150	7.21157	21.1922	7e-05	0			125
chr14	99502300	99502660	7.20301	23.5905	7e-05	0			38;25;18;13;115;63;129;126;130;35;30;56;22;24;128;57;27;28;86;41;26;73;46;91;29;16;76;108;95;15;23;72;123;11;9;12;36;96;34;65;58;127;103;19;98;124;117;62;66;64;52;87;53;32;10;68;83;47;82;48;107;14;89;37;85;71;45;94;105;114;44;100;80;75;92;81;54;121;39;21;102;61;84;120;122;70;17;67
chr9	1743600	1743750	7.20055	14.8725	7e-05	0	phastBias		127
chr9	20804580	20804730	7.19762	11.0794	7e-05	0			16
chr15	38170560	38170950	7.19738	16.9966	7e-05	0			97;63;95;116;60;93;48;125;65;85;118;97
chr1	223059740	223060440	7.19615	14.5962	7e-05	0			79;20;30;119;9;116;35;64;89;91;88;52;84;121;71;72;61;92;73;36
chr3	65869200	65869630	7.18423	5.59107	8e-05	0.00041			13;109;101;40;82;112;83;116;125;105;55;60;59;30;74;81;13;120;95;122;108;36;106;54;68;57;93;121;50;18;43;48;69;71;42;35;73;1;16;70;39;10;62;76;88;58;9;66;65;19;90;92;8;61;11
chr12	43150800	43151235	7.14745	15.6877	8e-05	0			99;43;93;107;92;35;73;72;68;61;14;66;36;62;67;106;75;65;64;88;71;44;80;29;15;46;48;45;115;85;83;78;47;63;52;41;84;53;87;58;79;96;50;86;89;81;39;109;105;42;54;18;37;121;82;120;76;74;112;34;56;95;94;12;91;23;70;13;21;32;26;128;103;122;27;24;25;127;123;124;101;130;30;57;22;126;129
chrX	33152220	33152610	7.13501	11.1721	8e-05	0			11;6;123;78;81;37
chrX	17065460	17065630	7.13103	8.54149	8e-05	2e-05			25;127
chr8	77282900	77283130	7.12941	14.4694	8e-05	0			72;10;9;11;67;85;65;92;45
chr7	69187880	69188250	7.12031	6.37981	8e-05	0.00018			121;84;54;81;86;18;53;57;48;82;56;12;14;41;75;37;19;83;10;87;13;96;6;30;95;89;16
chr18	22714860	22715210	7.09872	17.7696	8e-05	0			9;42;60;59;83;96;30;93;10;6;68;17;85;66;13;11;79;19;28
chr15	75746245	75746770	7.09162	8.85071	8e-05	1e-05			98;130;114;124;105;108;44;51;100;97;77;30;20;11;21;110;72;103;127;56;34;122;101;129;18;7;9;126;68;52;31;47;36;125;60;35;53;71;0;107;45;6;118;99;66;113;78;41;3;50;38;128;80;91;64;111;115;81;102;65;89;40;75;86;73;88;94;48;83;42;4;74;1;96;121;10;82;39;25;123;90;43;84;5;17;61;19;95;2;58;79;76;85;37;116;112;16;49;120;59;87;32;14;93;8;13;92;27;62;63;70;46;55;29;21;22;20;54;106;69;119;23;26;28;57;15;12;…
chr8	72639380	72639530	7.07661	6.97782	8e-05	9e-05			9
chr6	90861800	90862070	7.07399	6.53653	8e-05	0.00015			16;97;56;37
chr12	99515380	99515710	7.0706	11.3903	8e-05	0			57;16;63;127
chrX	22410280	22410760	7.05818	16.723	9e-05	0			87;57;85;45;47;96;79;38;69;15;16;84
chr18	23259560	23259950	7.03998	15.8186	9e-05	0			38;16;127;21
chr8	130368840	130368990	7.03963	4.87359	9e-05	0.0009			102
chr1	49082760	49082910	7.03696	7.84365	9e-05	4e-05			17
chr6	98946600	98946750	7.03378	7.52245	9e-05	5e-05			13
chr7	138564200	138564350	7.03229	6.201	9e-05	0.00021			113
chr13	67009340	67009630	7.01356	9.63075	9e-05	1e-05			125;13;116
chrX	138284080	138284310	6.99982	5.75194	9e-05	0.00035			99;102;39;63;55;82;83;57;81
chr5	122812460	122812690	6.99694	4.62626	9e-05	0.00118			52;68;91;53;75;66;92;70;89;65;94;45;72;78;67
chr2	26792905	26793190	6.99527	17.0291	9e-05	0			130;103;126;16
chr11	103924820	103925070	6.99303	6.31144	9e-05	0.00019			66;72;89;54;123
chr3	175569100	175569890	6.96996	4.65922	9e-05	0.00113			12;118;104;97;97;125;96;104;6;118;1;97
chr14	98099540	98099730	6.96368	30.6756	0.0001	0			38;16;9;116;10
chr9	13755620	13755990	6.96162	15.7698	0.0001	0	phastBias		95;39;63;37;82;81;57
chr14	90040900	90041090	6.95291	5.99893	0.0001	0.00027			17;127;28;32
chr11	125063060	125063290	6.9353	18.3972	0.0001	0			116;16;38;30
chr9	126225240	126225430	6.92746	4.74366	0.0001	0.00103			32;127
chr8	96356960	96357130	6.92596	4.89145	0.0001	0.00088			116;9;18
chr5	28215200	28215750	6.91972	25.622	0.0001	0			38;122;35;106;112;13;123
chr5	157753260	157753530	6.89591	15.7861	0.0001	0			11;103;128;22;23;24;25;27;26;130;126;9;21;127;129;32
chr10	3324160	3324450	6.89517	7.42248	0.0001	6e-05			19;93
chr21	17443380	17443790	6.88296	51.0005	0.0001	0			45;9;96;80;58;64;18;72;30;97;94;76;92;35;26;87;124;79;54;48;85;65;125;10;121;91;38;47;62;57;34;52;127;89;1;53;71;75;16;46;116;19;106;11;15;9;18;68;83;73;14;41
chr14	48143340	48143880	6.86022	45.5556	0.00011	0			24;125;105;6;117;101;108;32;30;25;37;122;23;127;27;38;18;103;129;16;79;28;101;57;122;87;117;105
chr4	183128080	183128490	6.85904	25.6192	0.00011	0			70;64;66;78;54;76;46;32;127;85;9;96;41;126;95;35;75;48;91;53;17;27;12;123;11;79;8;84;7;47;19;13;30;83;1
chr4	17022180	17022330	6.85636	12.0283	0.00011	0			38
chr6	16431400	16431670	6.85318	22.9709	0.00011	0			116;11;38;16;9
chr11	86299520	86299880	6.84477	6.16557	0.00011	0.00022			67;43;46;62;26;59;99;129;42;56;32;65;41;90;13;126;93;48;63;24;83;60;74;105;25;127;57;35;18;39;95;23;50;101;122;9;79;16
chr12	65297600	65297870	6.84028	7.76565	0.00011	4e-05			91;14;88;89;93;81;75;46;80;48;85;53;34;59;47;37;9;83;56;60;54;10;67;36;82;121;11;79
chr2	208001560	208002050	6.83986	6.0199	0.00011	0.00026			115;34;64;51;91;125;110;35
chr10	4764160	4764570	6.8085	5.09574	0.00011	0.00071			9;99;44;63;106;120;81;56;112;109;95;80;12;84;34;78;62;71;65;75;39;70;89;82;73;64;61;46;72;66;91;88;36;68;87;67;85;94;53;58;54;79;92;37;121;45;41;52;47;29;14;48;10;116;11
chr1	19668300	19668935	6.80736	7.44345	0.00011	6e-05			97;130;10;71;9;16;11;100;72;97;94;62;45;89;75;73;70;10;91;34;76;117
chr13	101126060	101126210	6.80355	11.8689	0.00011	0	phastBias		97
chr9	3646960	3647110	6.79457	11.6306	0.00011	0			38
chr2	12061180	12061650	6.79043	21.2482	0.00011	0			119;30;84;113;102;126;23;130;103;21;25;127;24;26
chr12	78240800	78241080	6.78709	19.6218	0.00011	0			17;99;95;111;83;39;14;13;76;59;48;42;82;93;74;34;85;86;29;60;90;107;87;41;53;121;65;28;54;70;68;66
chr2	145868640	145868810	6.76842	6.32686	0.00012	0.00019			11;10;9
chr1	232170400	232170630	6.75444	8.55839	0.00012	2e-05			62;52;118;96;89;121;73;58;71;14
chr16	82661420	82661700	6.74521	16.6975	0.00012	0			66;130;40;97;74;27;21;61;53;60;90;16;87;129;34;9;11;76;69;28;23;18;103;10;37;6;128;25;98
chr12	97553225	97553530	6.74312	12.9683	0.00012	0			108;106;110;112;13;30
chr1	107291285	107291490	6.74136	4.2427	0.00012	0.00179			104;70;109;76;46;29
chr10	119354320	119354570	6.73242	5.11509	0.00012	0.00069			89;57;124;70;10;24;53;76;11
chr6	98990580	98990730	6.7283	7.89063	0.00012	4e-05			16
chr5	168313300	168313470	6.72558	11.1717	0.00012	0			28;35
chr3	12940580	12940875	6.72149	17.3563	0.00012	0			96;126;130;129
chrX	18050260	18050450	6.71955	7.12773	0.00012	8e-05			38;16
chr14	74600580	74600770	6.71889	13.5155	0.00012	0			39;13;8;63
chr12	128346080	128346410	6.71882	7.85558	0.00012	4e-05			11;10;9;6
chr6	40489120	40489330	6.71689	17.534	0.00012	0			38;16
chr1	209630840	209631070	6.7149	14.47	0.00012	0			13;95;39
chr7	31232560	31232875	6.70694	12.1486	0.00012	0			13;102;110;10;56;1;11;46;42;112;60;66;34;94;17;52;73;69;97;113;6;63;83;30;39;106;80;87;14;28;18;38;107;116;36;59;15;44;93;62;64;115;91;76;21;32;125;120;65;81;43;99;35;100;26;16;68;82;118;45;75;122;101;124;109;103;20;12;8;19;121;9;57;89;37;22;27;95;54;105;108;31;96;40;127;29;23;25;117;126;129;24;104;128;130
chr5	5539725	5540070	6.69344	7.00774	0.00013	9e-05			126;25;23;127;118;125
chr9	82394840	82395230	6.68891	21.3988	0.00013	0			10;16;11;38;118;12
chr1	216356780	216357170	6.67748	48.8454	0.00013	0			128;38;103;88;16;125;71;127;116;118;95;39;58;9;14;121;47;123;96;89;62;30;13;73
chr9	102495040	102495410	6.67642	28.5962	0.00013	0			28;42;19;54;75;48;78;58;96;85;67;65;60;74;10;43;62;35;31;71;93;116;66;50;72;89;6;17;68;94;90;111;59;69;70;64;52;40;55;18;11;13;9
chr5	134570320	134570750	6.66112	14.9261	0.00013	0			121;62;118;108;125;97;73;106;9;35
chr9	109622100	109622540	6.62697	19.2566	0.00014	0			13;20;7;24;108;32;10;19;22;16;21;26;42;38;11;34;68;91;126;12;60;28;120;127;9;25;128;23;17;117;30;40;103;99;129;14;107;8;18;27;97;95
chr10	108787280	108787430	6.62253	12.4163	0.00014	0			28
chrX	153220145	153220335	6.62028	8.01089	0.00014	3e-05			117;129
chr21	33220160	33220450	6.59476	4.05326	0.00014	0.00221			11;10;28;12;119
chr6	93472080	93472790	6.56107	50.3785	0.00015	0			116;127;38;26;16;35;84;53;11;57;70;19;13;18;96;10;30;28
chr3	2701980	2702310	6.56032	4.4762	0.00015	0.00139	phastBias		28;125;19
chr9	2623240	2623780	6.55366	4.05271	0.00015	0.00221	phastBias		44;20;51;9;27;32;118;18;97;110;100;24;93;30;94;71;60;69;91;127;26;17;6;9;22;64;90;23;128;130;129;25;40;99;55;70;122;68;21;65;75;59;66;126;117;27;18;74;62;125;42;57;28;16;101;89;12;38;10;11;52;45;92;121;48;43;73;83;102;96;35;46;80;54;88;53;61;41;36;87;14;120;79;58;85;34
chr7	31512940	31513090	6.53055	12.1156	0.00015	0			118
chr18	53359420	53359710	6.52864	24.1693	0.00015	0			35;38
chr4	145793560	145793990	6.52274	38.2726	0.00015	0			64;13;68;66;41;83;85;73;65;30;11;28;57;1;35;45;8
chr17	71800180	71800755	6.51875	23.8709	0.00015	0			16;38;13;117;27;24;23;21;32;30;26;127;130;126
chr2	8549680	8550270	6.49304	7.3796	0.00016	6e-05			79;47;75;91;57;39;64;68;45;63;6;18;28;16;9;38
chr2	106054240	106054550	6.47396	12.3983	0.00016	0			93;89;75;125;8;68;58;66;67;35;1;48;94;97;45;41;71;47;65;53;88;92;70;46;78;85;62;80;95;64;14;73;54;121;79;52;34;72;18;36;87;61;83;6;30;57;84;15;17;13;16;50
chr1	19688140	19688655	6.4688	16.759	0.00016	0			116;119;44;47;70;79;86;82;56;35;46;121;15;81;106;73;83;29;87;58;41;61;14;75;36;88;53;45;71;108;62;94;54;80;64;48;34;89;78;96;52;91;85;72;118;129
chrX	21816980	21817370	6.44854	5.75492	0.00016	0.00035			1;110;122;86;123;107;63;99;37;120;127;96;91;66;82;79;56;124;95;76;15;28;53;85;43;78;81;65;39;57;54;46;70;83;75;36;41;8;64;67;29;87;98;44;48;93
chr13	48224440	48224670	6.44691	5.08229	0.00016	0.00072			89;15;53;71;72;92
chr13	110900260	110900755	6.4322	11.406	0.00017	0	phastBias		79;17;30;35;8;18;14;13;75;93;46;76;15;45;16;40;67;52;73;92;47;87;84;54;81;19;55;28;58;80;43;11;64;91;62;53;71;116;70;6;69;36;78;94;121;66;85;95;96;83;90;65;72;34;61;41;42;38;74;48;12;68;57;1;10;32;9;117;124;126;127;100;129
chr18	64447520	64447670	6.43133	5.56192	0.00017	0.00043			96
chr14	60999240	60999450	6.4263	4.54208	0.00017	0.00129			86;82;81;29;56;25;37;107
chr2	225510500	225510790	6.42194	13.0615	0.00017	0			25;7;101;18;23;21;22;107;122;126;102;81;1;8
chr18	19402440	19402590	6.41675	4.78007	0.00017	0.00099			123
chr2	21980620	21981350	6.403	48.3414	0.00017	0			48;28;127;78;54;52;96;38;16;9;27;62;116;73;58;118;127;32
chr4	143114420	143114570	6.40249	5.8235	0.00017	0.00032			19
chr9	14531525	14531730	6.40195	19.1201	0.00017	0			126;103
chr12	130548545	130548710	6.39576	15.0685	0.00017	0			108;106
chr1	202251720	202251990	6.38367	6.01938	0.00018	0.00026			9;16;78
chr14	69172700	69173160	6.38063	7.17701	0.00018	8e-05			112;130;12;122;101;44;1;37;29;30;56;8;18;81;7;86;95;82;39;11;109;96;40;19;88
chr7	8418920	8419230	6.36997	14.6306	0.00018	0			13;18;125;101;122;126;38;16;27;6
chr8	50969280	50969870	6.3659	8.41177	0.00018	2e-05			18;127;118;24;26;23;128;32;84;71;120;48;47;87;52;72;54;15;67;88;70;42;73;58;44;66;37;85;65;91;94;75;6;29
chr6	1626280	1626610	6.36572	6.49008	0.00018	0.00016	phastBias		30;27;45;31;53;16;6;115;54;35;116;88
chrX	133309720	133309950	6.35656	6.74584	0.00018	0.00012			96;27
chr12	102864780	102865030	6.35529	7.01287	0.00018	9e-05			15;9;10;11;113;19
chr10	77809800	77810195	6.35415	23.366	0.00018	0			46;96;29;72;71;94;70;95;63;85;75;11;87;115;9;39;56;4;10;30;13;106;108
chr3	97454780	97454930	6.35269	20.766	0.00018	0			125
chr15	102010900	102011355	6.34955	4.95738	0.00018	0.00082			19;23;1;113;8;125;127;19;32;103;126
chr5	88753780	88754150	6.34801	22.4889	0.00018	0			2;0;113;99;65;79;63;49;50;44;122;40;31;29;37;67;98;91;55;47;83;66;96;87;62;72;56;54;107;81;95;38;64;41;53;52;57;121;46;75;39;45;58;70;86;82;123;48;89;92;10;101;124;15;76;35;34;74;71;94;69;73;11;28;18;16;17;9
chr2	22822540	22822770	6.34109	14.1653	0.00018	0			16;38;11
chr6	140783380	140783530	6.33662	4.56659	0.00019	0.00126			10
chr18	56578960	56579470	6.33601	4.46689	0.00019	0.0014			66;90;9;11;45;128;71;68;89;16;10;87;43;129;26;32;17;67;20;54;93;79;36;104;19;88;95;48;42;8;76;84;39;23;60;65;13;59;21;58;85;80;30;61;126;35;74;90;1;6;18;28;40;69;55;22;50
chr2	215442400	215442850	6.31618	23.2665	0.00019	0			38;57;86;81;87;56;37;82;83;41;96;54;15;116
chr7	152999040	152999310	6.31405	6.98168	0.00019	9e-05	phastBias		27;38;6;30;13
chr10	114345620	114346070	6.28283	29.1749	0.0002	0		31	78;6;17;16;46;35;79;70;121;47;92;72;58;83;66;71;68;91;45;94;38;62;73;89;14;76;15;52;41;57
chr20	11108780	11109390	6.275	20.197	0.0002	0			10;58;47;70;54;80;45;73;14;62;64;52;66;35;67;15;72;89;53;85;36;94;121;71;91;75;68;65;18;9;16;11;10;38;28;73;89
chr10	73113680	73113870	6.27092	10.6055	0.0002	0			12;119
chr11	87015480	87015850	6.26881	4.40699	0.0002	0.00149			113;28;10;35;17;30;18;9;1;13;64;71;46
chr4	128260880	128261070	6.26792	12.6718	0.0002	0			11;9
chr7	119916880	119917090	6.25303	6.05647	0.0002	0.00025			116;96
chr4	182728980	182729210	6.24889	5.2548	0.0002	0.00059			54;48;80;41;62;75;86;85;52;36;61;87;53;88;15;83
chr4	182271860	182272010	6.24793	15.2412	0.0002	0			96;30
chr7	69075265	69075610	6.24329	10.9894	0.0002	0			98;16;25;22;32;21;116;15
chr11	31893460	31893930	6.2249	4.59325	0.00021	0.00122			119;127;96;56;82;123;62;57;44;37;48;107;81;86;124;29
chr4	14771660	14771910	6.22427	29.3127	0.00021	0			16;35;38
chr3	41381360	41381510	6.20582	7.20889	0.00021	7e-05			17
chr1	57184940	57185130	6.205	14.7298	0.00021	0			16;38
chr8	92020860	92021350	6.2	12.7593	0.00021	0			102;116;85;54;69;48;90;64;40;93;60;67;59;74;66;87;43;74;55;36;40;84;64;35;69;85;67;54;79;65;116;106;93;53;13;112;90;19;50
chr8	25837740	25837890	6.19765	7.83672	0.00022	4e-05			116
chr6	45868860	45869175	6.19732	8.70022	0.00022	2e-05			21;126;26;128;127;24;103;25;22;23;129;130
chr4	105341940	105342490	6.19646	50.1217	0.00022	0			38;21;26;125;25;35;30;11;24;23;126;27;128;6;127;22;16;19;14;83;18;53;48;87;78;32;46;9;103;96;79
chr12	92788500	92788870	6.19578	6.96279	0.00022	0.0001			51;5;77;119;33;111;113
chr5	5582205	5582470	6.19302	8.61688	0.00022	2e-05			98;19;6;103;25;127;118
chr10	48557700	48558350	6.19004	7.16783	0.00022	8e-05			100;20;22;24;1;30;21;31;104;16;27;115;117;20
chr9	2159560	2160390	6.1869	88.1963	0.00022	0	phastBias		6;1;116;25;67;70;94;91;36;121;71;76;68;74;64;79;22;87;78;65;54;89;96;31;69;39;18;57;85;106;61;32;50;26;16;99;7;21;81;87;43;127;82;42;93;60;120;55;75;8;62;30;49;40;38;103;29;53;124;64;93;6;66;70;59;91;28;10;17;102;20;96;45;9;79;116;84;35;52;11;19;37;13;6
chr6	14431640	14431950	6.18352	19.7174	0.00022	0			25;24;73;9;11;18;28;16;35;10;82;32;38;37;118
chr10	8794120	8794270	6.17884	21.5862	0.00022	0			35
chr7	23146520	23147230	6.17637	3.97341	0.00022	0.00241			61;79;69;55;90;43;59;88;74;13;30;34;40;89;92;99;36;68;62;67;38;85;54;17;106;52;124;49;116;50;42;1;35;113;115;27;13;96;118
chr11	103151280	103151430	6.16621	7.5626	0.00022	5e-05			47
chr3	6969840	6970070	6.16382	7.71973	0.00022	4e-05			63;39;79;57;81;83;46;41;82;95;106;56;44;37
chr9	272805	273130	6.14444	8.10975	0.00023	3e-05	phastBias		114;12;9;17;11;4;5;18;31;0;2;3;115;33;102;10;111;113;77;49;20;51
chr10	116675140	116675470	6.13586	14.3648	0.00023	0			116;8;13;52;95;7;84;58;39;106;30;63;89;1;73;79
chr11	15561260	15561470	6.13551	7.53585	0.00023	5e-05			23;24;103
chr1	113811840	113811990	6.13197	7.15106	0.00023	8e-05			118
chr15	35814080	35814650	6.12692	32.6043	0.00023	0			96;17;69;36;48;61;50;43;26;85;66;40;60;64;78;54;80;93;121;55;84;13;74;42;71;6;88;90;30;17;35;59;18;116;34;65;92;62;125;57;87;97;52;9;24;23;25;68
chr3	143201620	143201790	6.12194	4.32063	0.00023	0.00164			17;2;49
chr14	33526920	33527130	6.10268	17.0248	0.00024	0			56;112;106
chr4	99567320	99567490	6.09322	4.65701	0.00024	0.00114	phastBias		86;60
chr10	109431580	109431970	6.09262	10.2106	0.00024	0			26;127;103;23;25;22;21;24
chr5	132803540	132803770	6.09	10.8992	0.00024	0			95;30;13
chr5	5374160	5374520	6.08973	11.4663	0.00024	0			56;47;70;54;87;53;75;36;41;48;124;89;85;76;10;83;45;46;95;52;11;73;14;15;121;37;78;79
chr6	73208800	73208950	6.08624	19.115	0.00024	0			38
chr2	119600160	119600580	6.08533	26.2257	0.00024	0	phastBias		19;79;65;59;87;24;9;23;67;25;44;51;129;100;32;130;8;126;41;77;97;103;117
chr8	10234780	10235030	6.08518	4.68835	0.00024	0.0011			9;97
chr7	134501240	134501650	6.08217	8.52102	0.00024	2e-05			88;46;59;81
chr7	18534740	18535050	6.07807	32.5156	0.00024	0			28;84;125;38;11;85;78;70;94;34;14;80;53;57;68;101;20;96;54;16;62;95;115;48;45;83;75;58;10;76;52;17;47;19;39;65;29;67;87;15;36;6;41;92;88;46;79
chr8	110650340	110650590	6.07723	12.9398	0.00024	0			128;9;39;63;107;12;101;86;37;82;30;95;96;99;110;122;105;117;32;56;1;81
chr1	245851420	245851950	6.06931	20.6884	0.00025	0	phastBias		129;57;130;6;114;104;21;31;9;97;105;103;117;25;22;18;127;26;24;23;32;129;27;109;126;130;114;128;20;23
chr18	57368400	57368850	6.06905	9.07093	0.00025	1e-05			96;64;8;104;1;7;18
chr4	179441860	179442010	6.06829	4.79847	0.00025	0.00097			38
chr3	35721780	35722050	6.06411	9.91103	0.00025	0			38;111;116;31
chr1	54725380	54725670	6.0606	22.5329	0.00025	0			18;16;38
chr7	127176020	127176170	6.0563	17.1158	0.00025	0			38
chr2	36654940	36655220	6.05288	5.6118	0.00025	0.0004			121;124;74;76;85;15;93;126;29;40;80;65;34;52;14;48;39;37;59;64;53;36;21;61;75;84;62;88;87;70;67;112;58
chr3	157212480	157213050	6.04976	7.46145	0.00025	6e-05			106;109;112;30;57;15;65;54;47;83;78;48;70;96;68;34;61;53;45;92;36;46;76;85;87;41;71;52;84;66;14;79;73;58
chr17	6063620	6063810	6.04395	7.95604	0.00025	3e-05			16;57;38;6;30
chr9	2241880	2242215	6.04278	5.67766	0.00025	0.00038	phastBias		104;22;37;25;26;43;51;8;15;64;90;23;28;70;4;88;21;54;60;81;63;84;87;30;106;9;120;83;61;44;48;127;59;107;32;66;128;92;24;41;113;126;130;39;40;72;46;103;68;45;16;31;80;75;1;19;52;47;65;42;94;34;100;96;97;110;14;74;116;89;73;71;118;93;11;55;82;6;78;101;124;108;117;122;109;77;56;57;12;0;36;20;91;69;53;27;62;17;49;102;35;125;18;119;3;58;38;10;33;86;115;2;121;85;111;5;7;76;13;112;95;114
chr15	67687200	67687490	6.03718	10.4988	0.00026	0			11;10;73;89
chr2	195351180	195351330	6.0324	5.61642	0.00026	0.0004			16;38
chr10	78874300	78874535	6.03135	11.4222	0.00026	0			22;129;24;103;26;23;128;127;25;126;21;130
chr3	34354220	34354450	6.02749	18.9169	0.00026	0			39;30;38;16;32;9;127;35
chr3	185957140	185957395	6.02326	21.2184	0.00026	0	phastBias		19;126;13;130;78;35;22;129;18;12;6;25;21;46;125;11;30;28;85;23;10;32;27;57;17;124;76;54;127;31;106;16;9;112;102;96;107;38;118;103;70;119;82;24;1;26;99;121;128;115;122;108
chr13	100395325	100395650	6.02158	31.4669	0.00026	0			126;21;116;27;103
chr15	94433300	94433450	6.01707	4.6842	0.00026	0.0011			19
chr12	18694240	18694390	6.0145	11.0403	0.00026	0			6
chr2	218770160	218770410	6.01304	9.69315	0.00026	1e-05			70;10;28;53;76;9;111;11;31;16;100
chr16	65043720	65043870	6.00717	8.37	0.00026	2e-05			35
chr4	155151360	155151550	6.00557	6.11433	0.00026	0.00024			71;58;94;89;73
chr3	19442100	19442350	5.99662	4.52394	0.00027	0.00132			118;96
chr5	11888460	11888650	5.98699	4.66801	0.00027	0.00112			96;57
chr1	87718160	87718430	5.97907	5.19454	0.00027	0.00063			9;76;70;80;47;64;48;83;73;94;62;71;121;52;46;41;87;92;68;67;88;45;89;61;14;102;53;58;39;84;95;75;85;36;91;34;72;12;63
chr5	124726000	124726350	5.96612	7.98792	0.00028	3e-05			73;97;121;9;89;50;11;19;17;31;91;35;45;28;13
chr4	20195240	20195950	5.96027	10.4778	0.00028	0			28;30;121;13;73;67;116;17;19;116;95;59;36;69;28;31;55;41;10;63;40;88;42;39;15;43;80;84;34;48;90;14;85;86;64;50;121;29;61;65;92;87;96;53;83;54;68;67;44;11;45;91;93;115;62;58;73;82;47;57;60;70;18;46;35;94;81;66;71;52;75;74;72;89;78
chr2	84461280	84461510	5.95386	8.72871	0.00028	1e-05			86;56;37;29;81
chr8	10981620	10981970	5.93776	6.00035	0.00028	0.00027			51;0;3;119;33;20;111;2;4;114;5;31;17;77;49
chr8	18438200	18438710	5.93752	7.23511	0.00028	7e-05			127;7;13;1;35;8;30;96;18;100;56;127;87;39;78;36;28;95;60;89;16;125;59;57;19;54;76;48;83;41;42;6;93
chr17	73686725	73686970	5.92761	9.32337	0.00029	1e-05			109;102
chr1	214549280	214549570	5.92437	7.44667	0.00029	6e-05			29;96;83;39;57
chr14	32346360	32346890	5.91992	7.71196	0.00029	4e-05	phastBias		99;55;69;34;46;75;118;41;73;10;89;12;66;53;9;92;67;36;85;43;70;52;74;48;30;116;42;65;11;84;62;58;121;59;88;93;60;94;61;80;35;40;87;18;54;17;14;28;90;68;6;79;50;13
chr10	77499545	77499875	5.91506	15.9497	0.00029	0			108;106;112;105
chr5	81518480	81518990	5.91298	17.5604	0.00029	0			116;121;91;72;92;62;71;34;95;46;14;58;53;29;52;48;45;81;37;87;93;56;70;65;12;67;57;96;44;79;78;83;47;54;86;41;35;106;84;97;32
chr10	24642360	24642590	5.9117	4.29826	0.00029	0.00168			54;118;35;96
chr4	48081980	48082790	5.90987	7.20808	0.00029	7e-05			60;93;13;42;18;35;79;43;1;50;100;97;127;60;112;74;65;106;73;42;57;35;12;123;58;83;32;107;62;59;41;53;98;120;93;95;84;121;45;48;78;54;34;70;39;96;85;29;56;13;63;81;37;17;116;71;87;30;86;82;43;58;45
chr10	123072640	123072930	5.90486	21.5276	0.00029	0			13;128;20;82;24;26;56;37;81;29;118;18;12;35;32;30;28;86;99;23;44
chr22	28145200	28145355	5.9024	6.64351	0.0003	0.00013			88;126
chr8	6366400	6366690	5.89776	15.8882	0.0003	0			74;40;69;106;90;108;55;88;60
chr6	100694180	100694410	5.89351	7.64273	0.0003	5e-05			10;46;7;14;8;83;1;113;13;41;53;121;62;58;94;73;34;122;101;39;65;89;57;63;52
chr19	31398500	31398650	5.89072	19.6062	0.0003	0			30
chr2	21676640	21676870	5.88006	14.2222	0.0003	0			38;84;67;64;61;88;36;54
chr2	53341860	53342050	5.87653	17.6954	0.0003	0			38;9;16
chr18	39998340	39998530	5.87439	5.37806	0.0003	0.00052			13;84
chr8	144561860	144562030	5.8738	23.967	0.0003	0			113;8;19;104;6
chr3	114378340	114378770	5.87325	7.53557	0.0003	5e-05			55;40;28;87;103;94;13;1;30;50;92;91;62;58;11;73;89
chr7	94051000	94051390	5.87276	4.25027	0.0003	0.00178			45;15;73;52;91;94;11;10;72;85;75;92;125;9;89;36
chr6	1385280	1386010	5.87257	10.077	0.00031	0	phastBias		21;104;32;117;26;24;16;103;34;18;64;115;22;72;88;35;85;8;73;49;117;27;9;23;54;119;61;92;88
chr7	126631180	126631530	5.87188	7.71638	0.00031	4e-05			19;6;118
chr9	119139565	119140010	5.86879	8.90089	0.00031	1e-05			124;36;46;56;79;120;107;44;53;92;83;128;94;45;32;63;84;127;81;103;88;59;34;67;86;41;70;14;95;96;64;82;52;29;91;57;36;93;39;121;65;75;87;48;90;98;124;99;37;89;85;15;46;78;117;50;73;58;68;62;76;123;47;56;61;72;71;54;80;66
chr2	22551960	22552550	5.86673	24.982	0.00031	0			127;10;22;16;38;28;125;19;9;10;11;35;16;38
chr6	46922380	46922900	5.86526	7.66083	0.00031	5e-05			59;21;17;23;24;30;128;59;90;93;55;40;60;74;10;69;42;6;50;13;11;43
chr4	93686580	93686730	5.86253	6.82773	0.00031	0.00011			13;30
chr10	117873800	117874030	5.85923	13.2587	0.00031	0			79;94;37;36;54;62;47;53;61;15;88;41;87;95;14;48;83
chr11	12351420	12351650	5.85525	6.2578	0.00031	0.0002			89;73;52;58;94;57;76;70;125
chr5	151462960	151463170	5.85344	7.28231	0.00031	7e-05			125;6;127
chr11	16191520	16191870	5.85149	20.1367	0.00031	0			92;25;21;89;125;27;97;70;10;11;58;94;14;15;9;116;53;73;52;47;79
chr20	9455560	9456030	5.8445	9.25426	0.00031	1e-05			88;6;57;92;58;29;62;121;94;47;52;125;89;56;46;83;54;41;75;15;36;72;34;38;87;14;73
chr18	22622580	22622930	5.83472	13.0164	0.00032	0			8;1;7;42;60;28;18;59;93;40;74;32;55;88;123;69;50;6;90;63;34;43;17;127
chr2	60280860	60281290	5.83384	4.94119	0.00032	0.00083			22;37;24;23;56;82;86;81;1;122;7;18;20;101;2;114;119
chr3	1237640	1237970	5.83338	6.60493	0.00032	0.00014			56;72;39;71;63;94;73;41;66;79;47;46;83;68;52;45;57;17;89;85;75;82;48;87;54;53;95;91;65;92;62;123;14;15;37;6;70;64;84;67;34;80;78;36;96
chr10	14144800	14145010	5.83307	4.31049	0.00032	0.00166			38;96;9
chr21	42059585	42059850	5.82907	4.02319	0.00032	0.00228			126;111;118;127;32;103
chr8	38237780	38238200	5.82643	9.30675	0.00032	1e-05			58;40;85;63;43;92;84;113;50;64;106;11;69;93;5;88;90;10;32;87;39;91;31;42;60;73;74;59;18;75;108;105;35;48;102;55;54;116;17;28;33;17
chrX	31850280	31850670	5.81778	9.55228	0.00032	1e-05			123;44;63;29;42;81;96;76;39;95;87;70;1;113;125;82
chr8	58779560	58779890	5.81635	5.12254	0.00032	0.00069			16;11;9;10;53;46;76;52;96;70;89
chr3	178785140	178785410	5.80596	5.20236	0.00033	0.00063			110;28
chr11	30952360	30952610	5.80389	8.98512	0.00033	1e-05			96;48
chr15	36587220	36587370	5.80316	9.23805	0.00033	1e-05			96
chr15	61591340	61591590	5.80129	10.0508	0.00033	0			30;10;17;18;89;35;9;13
chr19	34857520	34858080	5.80067	4.27275	0.00033	0.00173			3;17;102;115;37;6;61;81;78;121;47;71;70;72;92;46;19;56;113;67;85;28;36;41;34;10;89;94;52;96;73;53;64;84;68;15;35;62;76;116;9;87;45;14;18;58;91;65;112;54;12;106;124;109;80;83;75;30;66;48
chr7	25802220	25802490	5.79735	5.74454	0.00033	0.00035			37;9
chr9	74296120	74296600	5.78627	4.44737	0.00033	0.00143			17;114;31;2;0;49;67;48;45;53;54;73;84;62;58;71;79
chr16	73086940	73087560	5.77803	34.8889	0.00034	0	phastBias		9;11;55;69;40;130;22;103;26;25;129;126;21;27;127;118;24;23;112;7;81;52;124;98;74;93;56;70;85;61;66;117;120;54;43;67;78;87;42;48;95;39;90;76;82;40;37;80;109;96;41;60;15;1;57;69;34;79;50;83;59;55;88;47;63;123;65;128;8;27;9
chr9	98803060	98803360	5.77685	8.15385	0.00034	3e-05			1;88;30;9;11;73;89;46;61;35;71;57;80;13;92;64;121;36;91;18;112;10;120;8;106
chr10	123268680	123268930	5.7652	9.98692	0.00034	0			8;17;13;19;11;35;38;16;10;9;18;30
chr17	46222880	46223110	5.75896	15.4206	0.00034	0			127;104;118
chr12	1157465	1157770	5.75777	17.623	0.00035	0			104;130;29;10;16;101;31;17;62;34;118;58;97;55;38;121;19;102;94;73;89;11;125;52;115;122;43;42;60;40;59;70;116;76;90;74;93;50;69
chr5	74434620	74434870	5.75232	4.53447	0.00035	0.0013			24;21;38;116;16
chr14	78184040	78184190	5.75086	6.09491	0.00035	0.00024			102
chr6	152451620	152451870	5.74938	8.1691	0.00035	3e-05			36;58;44;56;123;73;67;76;81;37;12;93;60;45;78;89;29;34;82;70;62;54;11;84;86
chr4	38948180	38948430	5.74863	9.68613	0.00035	1e-05			16;9;11;10;38
chr15	37190760	37191210	5.74845	44.2418	0.00035	0			24;8;22;21;54;26;129;6;126;127;57;25;23;85;35;1;13;28;79;16
chr3	67458320	67458470	5.74515	7.87013	0.00035	4e-05			71
chr7	39447320	39447510	5.74468	13.6917	0.00035	0			1;8
chr16	77613220	77613560	5.74351	11.6811	0.00035	0			127;95;89;63;39;9;18;94;14;99;65;72;56;73;88;120;93;60;75;67;78;54;61;71;84;92;112;53;48;50;108;10;11;106;85;64;91
chr3	147239500	147239770	5.73663	6.68317	0.00035	0.00013			54;36;14;15;94;66;43;68;34;64;65;92;59;58;52;76;46;121;47;89;53;41;85;83;70;96;67;87;62;75;45;60;93;48;73;50;81;79
chr9	16830880	16831150	5.73563	13.663	0.00035	0			76;10;67;70;89;45;69;55;93;52;75;11;9;59;60
chr1	79659180	79659440	5.73273	9.80635	0.00035	0			27;24;95;26;128;127;60;23;18;22;10;91;59;74;25;122;101;57;17;120;129;126;20;37;31;29;32;28;80;90;21;107;56;42;46;119;93;121;14;53;64;83;87;48;36;81;68;73;61;66;82;123;65;85;45;89;75;67;78;44;41;71;124;6;88;54;47;72;34;94;35;15;43;84;62;12;58;52;76;13;70
chr4	23979680	23979930	5.72649	6.99298	0.00036	9e-05			9;103;41;62;92;127;35;46;14;83;57;10;36;39;73;61;34;47;11;58;52
chr5	54752080	54752400	5.71787	6.27182	0.00036	0.0002			76;86;36;53;109;75;41;47;57;88;58;52;95;83;67;61;64;93;65;87;82;124;34;68;70;89;85;96;84;107;81;54;56;121;80;99;29;91;92;15;48;14;37;44;99;79
chr7	33483600	33483750	5.71203	7.83977	0.00036	4e-05			12
chr9	16964160	16964530	5.71092	5.68389	0.00036	0.00037	phastBias		128;23;103;24;57;78;32;127;46;87;76;68;66;48;85;124;123;37;96;15;117;81;65;107;79;88;56;82;67;41;70;75;73;94;95;29;84;83;36;64;34;121;61;71;47;89;91;62;86;52;54;14;53;72;80;58;92;98;45
chr9	129200200	129200350	5.7106	16.1068	0.00036	0			19
chr4	138683860	138684010	5.7058	7.2848	0.00036	7e-05			38;16
chr11	31623260	31623710	5.70046	49.9177	0.00037	0			24;32;22;21;127;27;103;128;26;25;21;23
chr7	39018140	39018550	5.69836	27.9152	0.00037	0			18;118;26;27;23;24;25;21;103;128;22
chr1	237207560	237207935	5.68625	7.72336	0.00037	4e-05			24;104;118;25;126;21;27;23;127;32;103;125;28;26;22;129
chr3	7961680	7961930	5.68434	4.42005	0.00037	0.00147			38;16
chr15	96389100	96389790	5.68375	28.8499	0.00037	0			19;17;13;18;30;9;28;16;11;27;10;87;79;88;6;65;67;95;64;84;53;92;48;80;72;61;35;85;36;78;54;121;34;73;91;79;19;13;71
chr6	98946320	98946550	5.681	26.4023	0.00037	0			17;30
chr12	102029520	102029750	5.67838	7.34222	0.00038	6e-05			49;116;31;38
chr7	13563400	13563650	5.67296	7.24688	0.00038	7e-05			16;69;55;57
chr18	43142480	43143030	5.67177	30.7119	0.00038	0			18;89;84;62;35;13;11;58;9;1;121;91;73;30;84;116;13
chr3	114137840	114138090	5.66986	16.7123	0.00038	0			70;35;38;68;58;69;16;85;10;55;84;64;46;54;11;91;121;40;62;59;88;90;72;89;71;52;34;73;75;94
chr2	161453020	161453410	5.66778	8.18752	0.00038	3e-05			19;71;41;46;83;47;92;14;64;94;73;52;88;53;70;78;57;14
chr2	119036605	119036870	5.66685	4.12129	0.00038	0.00205			105;47;76;82;15;37;81
chr18	2240380	2240610	5.66416	6.26486	0.00038	0.0002			92;72;88;87;54;75;121;73;61;71;80;48;84
chr4	105345660	105346230	5.65984	72.1267	0.00038	0			27;125;18;19;11;28;57;30;6;9;16;10;35;38;87;79;19;16;27
chr16	82816280	82817030	5.65837	13.5027	0.00038	0			27;25;38;16;26;130;28;30;53;9;11;23;7;66;128;96;65;22;24;10;32;103;127;43;59;90;21;129;126;25;42;70;40;76;50;74;1;18;69;60;55;8;7;109;118
chr4	95855420	95855810	5.65761	14.4291	0.00038	0			13;52;62;32;54;66;50;29;95;85;87;78;46;61;36;64;70;120;53;83;79;91;92;15;80;41;45;14;81;96;48;57;79
chr3	67637740	67638010	5.65732	13.3593	0.00038	0			79;38;16
chr6	155988260	155988410	5.65716	10.0473	0.00038	0			16
chr9	18448240	18448410	5.6537	6.48793	0.00039	0.00016			70;28
chr3	29482120	29482455	5.65109	25.6218	0.00039	0			26;46;79;82;122;89;116;9;84;81;69;83;59;18;27;94;35;125;16;28;13;37;74;78;57;41;127;39;93;95;38;30;87;10;101
chr1	175173420	175173770	5.64911	8.43545	0.00039	2e-05			37;44;9;56;11;6;29;16;30;18;2;39;63;10;38;35
chr14	78365365	78365515	5.64193	6.935	0.00039	0.0001			109
chr8	116714600	116715110	5.64029	37.6073	0.00039	0			116;89;14;94;34;84;9;10;11;62;71;72;121;116
chr1	209989200	209989690	5.63995	24.8285	0.00039	0			96;118;44;29;37;9;44;81;18;86;82;56;12;40;103;69;55;90;24
chr6	5167780	5168070	5.6337	5.98228	0.00039	0.00027	phastBias		88;54;40;74;43;36;58;116;121;48;46;50;93;62;66;53;60;64;67;85;108;61;59;106;42;34;80;65;79;35;17
chr2	227362040	227362190	5.632	6.30885	0.0004	0.00019			38;96
chr3	60787840	60787990	5.62918	6.39765	0.0004	0.00017			125
chr5	110456700	110456890	5.62593	9.82798	0.0004	0			63;95;39
chr2	108602605	108603115	5.61576	12.0596	0.0004	0			117;24;127;126;32;23;128;97;100;25;8;26;126;21;129;130
chr13	105442800	105442950	5.6143	11.9277	0.0004	0			11
chr18	27836740	27836890	5.60644	7.01153	0.00041	9e-05			38
chr9	134891940	134892170	5.60494	14.7787	0.00041	0			10;9;38;11;16
chr1	108225700	108226070	5.60412	4.75986	0.00041	0.00102			123;106;127;37;39;110;86;52;13;29;44;101;56;116;81;112;89;12;122;46;30;63;95;82;109;1;7;120;18;8
chr9	18496700	18497010	5.5988	8.24914	0.00041	2e-05			34;75;94;73;92;89;59;47;9;121;45;10;11;69
chr5	102276780	102277170	5.59869	5.6554	0.00041	0.00039			69;55;27;6
chr6	11228800	11229030	5.59782	4.24771	0.00041	0.00178			12;48
chr10	78010380	78010950	5.59614	39.8355	0.00041	0			83;41;30;78;14;18;79;12;35
chr2	151478040	151478710	5.59397	5.73174	0.00041	0.00035			11;10;19;35;13;71;73;121;64;9;42;66;79;80;53;92;40;85;50;41;98;88;56;34;83;60;59;82;47;54;107;29;62;72;67;36;74;58;96;70;15;78;123;76;91;46;63;75;14;61;39;48;95;120;93;94;43;89;65;87;84;45;81;6;57;52;124;68;37;86;99;44
chr8	94090760	94091090	5.59287	19.8664	0.00041	0			14;38;73;80;35;19;36;64;61;88;121
chr3	63953580	63953820	5.59202	14.2017	0.00041	0			30;46;37;7;57;16;19;27;9;20;8;113;1;11;18;38;25;103
chr14	70102660	70103430	5.59184	4.73817	0.00041	0.00104			77;51;33;88;16;114;35;42;41;79;9;111;32;113;60;28;90;49;43;127;17;31;20;93;74;59;6;119;68;5;33;11;10;18
chr16	27811380	27811550	5.59052	5.33722	0.00041	0.00054			16;38
chr11	113985980	113986695	5.58923	21.2743	0.00041	0			27;100;32;85;30;127;21;23;103;65;78;18;28;9;130
chr11	88908980	88909310	5.5836	15.021	0.00042	0			73;52;68;53;115;94;103;89;118;116;96;27;71;127;24;23;25
chr21	36341100	36341590	5.57646	4.38096	0.00042	0.00154			64;77;51;34;48;78;102;115;114;20;33;88;5;3;110;30;51;119
chr1	88261640	88261890	5.57563	6.83069	0.00042	0.00011			107;1;30;63;35;18;7;39;95;110;120;13;8
chr8	40068200	40068610	5.57503	8.04841	0.00042	3e-05			27;79;46;26;60;78;32;41;43;106;97;66;125;48;13;68;120;30;90;39;6;22;103;18;25;67;55;93;83;74;69;35;7;87;59;63;54;85;9;24;65;17;40;127;42;8;57;1;96
chr16	87098800	87099370	5.5737	9.13728	0.00042	1e-05			17;19;30;40;55;50;69;90;59;93;42;30;18;13;28;9;87;129;20;102;43;54;35;115;85;17;31;79
chr1	183820000	183820490	5.56956	8.49409	0.00042	2e-05			36;88;87;79;59;60;74;93;50;65;69;43;42;67;90;15;11;10;71;9;6
chr9	82283020	82283350	5.5682	27.19	0.00042	0			30;27;25;127;23;11;10;16;82;120;38;112;9;108;35;18;57;106
chr9	125043820	125044490	5.56463	26.2246	0.00042	0			54;28;69;50;43;59;40;74
chr8	93115000	93115270	5.56262	13.3518	0.00043	0			64;125;42;40;97;12;122;129;27;19;18;74;100
chr20	51759220	51759370	5.55841	5.03357	0.00043	0.00075			11
chr6	140887760	140888180	5.5506	5.57062	0.00043	0.00042			79;6;81;71;39;80;66;29;107;62;54;91;61;58;47;56;82;45;87;64;68;73;52;89;101;95;42;78;94;18;76;74;15;14;46;37;92;34;69;65;11;53;121;41;75;96;90;98;83;88;60;40;72;28;44;70;57;9;59;85;13;67;17;113;36;55;48;84;93;63;43;1;57;50
chr2	105489020	105489380	5.54952	5.03477	0.00043	0.00075			100;117;16;38;25;105;128;22;21;103;23;104;24;26;57;49;129;101;67;43
chr8	135421560	135421710	5.54927	10.9815	0.00043	0			38
chr4	55948740	55948890	5.54779	7.41379	0.00043	6e-05			84
chr12	108066120	108066350	5.54402	8.32031	0.00043	2e-05			38;16
chr7	127295120	127295330	5.53866	5.84444	0.00044	0.00031			113;31;115;17
chr4	16758780	16759210	5.53601	22.7288	0.00044	0			16;38;50;74;59;93;42;62;88;78;91;125;54;71;55;40;66;68;94;80;69;61;72;45;60;37;65;47;41;36;90;75;48;58;83;14;84;67;9
chrX	41510360	41510510	5.53302	4.03715	0.00044	0.00224			96
chr8	145693700	145694130	5.52326	25.3498	0.00044	0			3;130;126;31;129;119;20;102;104;26;128;32;23;117;24;9
chr6	33692040	33692330	5.52176	7.91759	0.00044	3e-05			38;9;33;119
chr4	72188240	72188450	5.51702	9.73126	0.00045	1e-05			92;14;41;52;78;45;36;83;53;46;71;47;63;48;96;87;61;58;88;62
chr11	115915700	115915910	5.51019	25.6847	0.00045	0			13;126;127;30
chr4	183228820	183229250	5.50769	4.60664	0.00045	0.0012			125;30;18;16;9;123;34;29;79;57;44;67;46;39;63;81;64;82;48;92;96;71;52;47;53;94;87;91;80;86;36;95;75;62;41;61;85;107;68;84;124;65;78;37;45;66;14;54;56;76;15;88;121;72;58;70;83
chr9	8784020	8784350	5.50202	31.8005	0.00045	0			11;13;9;122;95;73;30;39;64;52;96;45;10;63;6
chr1	81011420	81011570	5.50039	4.27683	0.00046	0.00172			79
chr11	42103800	42104190	5.49201	7.23318	0.00046	7e-05			25;103;127;27
chr21	45502400	45502940	5.48498	8.37157	0.00046	2e-05			77;4;5;28;13;33;18;111;113;1;8;17
chr3	107724960	107725555	5.48251	6.83176	0.00046	0.00011			90;109;118;49;107;2;46;83;95;31;98;111;127;113;41;123;28;8;57;54;1;76;48;84;45;122;96;70;7;18;125;101;78;35;112;43;108;39;91;30;50;56;37;86;19;12;82;52;17;29;65;13;55;59;44;69;81;66;40;63;60;120;74;42;105;124;6;90;68;93;11;32;104
chr15	94988820	94989050	5.48223	9.77964	0.00046	0			8;78;18
chr14	64705360	64705795	5.47917	4.94137	0.00047	0.00083			92;61;57;85;65;60;68;6;59;19;119;20;31;104
chr2	169630245	169630560	5.47689	4.72066	0.00047	0.00106			124;110;128;58;29;127;72;18;53;73;39;82;87;51;112;21;111;125;48;62;31;126;129;130;98;15;70;115;11;30;107;75;14;95;99;119;80;42;121;64;102;36;106;103;56;90;76;10;12;65;86;46;40;9;63;105;117;109;108;122;101;47;24;23;92;54;81;45;83;32;60;26;37;6;66;52;116;89;13;8;94;59;22;34;96;71;17;74;93;1;43;84;69;78;44;25;120;55;67;19;91;28;50;57;85;68
chr2	108677920	108678150	5.47092	7.65536	0.00047	5e-05			97;6
chr7	146351220	146351510	5.46985	17.6316	0.00047	0			106;30;16;108;85;128;127;46;57;9;79;32;14;23;48;95
chr3	71577620	71577830	5.46939	4.71356	0.00047	0.00107			30;13
chr18	53999705	53999890	5.46753	23.8123	0.00047	0			104;16;38
chr20	21922580	21922890	5.46638	12.5293	0.00047	0			10;127;46;11
chr3	168594220	168594500	5.46289	14.5006	0.00047	0			28;32;17;13;90;30;50;10;60;43;59;42;93;74;40;31;9;79
chr5	33616100	33616250	5.46062	6.43562	0.00048	0.00017			106
chr12	97752840	97752990	5.45377	9.69628	0.00048	1e-05			13
chr10	132615380	132615630	5.45148	4.93645	0.00048	0.00084			16;119;115
chr17	9877400	9877710	5.45119	6.08079	0.00048	0.00024			66;18;30;84;1;96;9;87;16;57;78;95;68;76
chr18	31165125	31165670	5.45015	38.7734	0.00048	0			126;22;35;16;129;128;26;23;24;19;103;21;127;27;38;28;25;9;126;27;82;12
chr2	217728640	217729030	5.44919	10.8216	0.00048	0			81;29;18;46;37;82;88;8;7;1;100
chr8	57125060	57125410	5.44735	9.41833	0.00048	1e-05			66;17;20;87;50;43;35;113;85;116;54;64;65;93;67
chr17	28004700	28004850	5.44521	4.09121	0.00048	0.00211			17
chr2	124996400	124996550	5.44479	9.83856	0.00048	0			11
chr20	51981200	51981370	5.44452	10.4955	0.00048	0			9;16;38
chr8	62006300	62006670	5.4415	7.85534	0.00049	4e-05			27;28;118;30;22;38;21;16;128
chr10	28552440	28552755	5.43854	11.4642	0.00049	0			1;18;13;16;100;38;81;95;82;56;126;122;25;106;30;112;108;101;109
chr6	51504840	51505250	5.43725	35.315	0.00049	0			106;16;38
chr14	55113560	55113750	5.4351	8.43798	0.00049	2e-05			35;40;69;9;11;55;10
chr6	70980385	70980615	5.43408	6.17329	0.00049	0.00022			101;39;27;122
chr7	18332260	18332410	5.43098	6.83724	0.00049	0.00011			17
chr6	77595560	77595820	5.4291	22.7516	0.00049	0			48;61;29;54;36;13;85;84;81;44;56;96;88;37;15;39;87;82;34;70;53;67;89;76;65;14;75;9
chr2	114647840	114648480	5.42496	18.418	0.00049	0	phastBias		40;18;7;101;108;109;117;130;19;129;30;110;27;103;97;100;44;16;102;51;22;21;76;109;124;101;122;32;115;8;29;108;88;28;99
chr4	102082560	102082810	5.42295	12.0218	0.0005	0			106;50;38;16;40
chr12	79559080	79559230	5.42288	5.08174	0.0005	0.00072			38
chr9	16138580	16139590	5.41997	12.3069	0.0005	0			22;53;41;83;23;128;29;35;16;79;43;57;46;61;124;85;91;9;19;11;65;48;13;39;10;88;64;36;62;52;18;95;89;71;68;45;66;76;58;92;81;41;96;80;121;34;67;94;72;15;8;54;30;73;78;123;83;53;87;47;84;75;14;70;17;1;76;120;98;13
chr12	110977600	110977870	5.41714	4.74677	0.0005	0.00103			118;6
chr1	109260560	109260850	5.41429	24.1185	0.0005	0			25;38
chr13	67462900	67463330	5.41268	12.6813	0.0005	0			19;92;54;38;79;11;85;48;53;70;81;76;67;1;8
chr3	39136440	39136870	5.41093	9.58441	0.0005	1e-05			111;113;19;52;78
chr5	142005180	142005550	5.40763	7.00887	0.0005	9e-05			18;9;28;16;19;125;104;35;127;46;38;45;10;92;65;94;75;15;34;71;89;53;73;12;70;58;66;68;52;54;47;72;14;57;6;84;78;85;80
chr2	23264260	23264470	5.40714	10.4147	0.0005	0			17;13
chr4	137813360	137813630	5.40638	13.8264	0.0005	0			116;12;27;24;127
chr11	19902800	19902990	5.39467	5.43409	0.00051	0.00049			38;16;76
chr18	35249100	35249370	5.39399	19.7997	0.00051	0			68;30;65;35;38;18;22;25;66;26;23;104;27;13;128;32;16;1;21;119
chr8	145698180	145698795	5.39106	12.7732	0.00051	0			23;22;1;9;102;129;108;40;69;32;34;16;126;100;24;60;18;6;107;28;30;127;109;74;86;59;8;26;130;8;129;22;130
chr4	183717100	183717635	5.39045	6.36991	0.00051	0.00018	phastBias		30;119;35;101;96;105;129;122;126
chr5	24623160	24623450	5.3874	16.0002	0.00051	0			94;16;28;10;11;14;21;127;125;35;13;17;30;38;18;9;116
chr3	114304600	114305350	5.38675	52.7836	0.00051	0			28;66;38;6;57;61;36;46;62;83;73;52;94;70;121;58;34;88;107;79;13;9;30;6
