# Supplementary material for: Comprehensive identification and analysis of human accelerated regulatory DNA
Source: HighWire-hosted journal article supplement (doi:10.1101/gr.192591.115), 2015-06-23
Supplement: Supplemental_Table_3.xlsx [file Supplemental_Table_3.xlsx]

## Sheet: Sheet1
chromosome	start	stop	PMID if published	results
chr1	209989050	209989824	PMID:18836445	Human_element932_positive_limb[9/9]:branchialarch[9/9]:eye[6/9]:nose[7/9]
chr2	236773458	236774696	PMID:18772437	Human_element521_positive_limb[6/6]:branchialarch[6/6]:eye[4/6]:ear[6/6]
chr2	238221820	238225273	PMID: 22138689	Human_element1951_positive_somite[9/11]:heart[11/11]
chr4	105345575	105346895	PMID: 23253453	Human_element260_positive_midbrain(mesencephalon)[6/8]
chr5	157752608	157754317		Human_element1735_negative
chr5	158227696	158229500	PMID:23375746	Human_element1137_negative
chr7	127174386	127177546		Human_element1308_positive_midbrain(mesencephalon)[7/7]:forebrain[7/7]
chr8	27752440	27753351		Human_element1741_positive_hindbrain(rhombencephalon)[4/6]:limb[6/6]:eye[5/6]:nose[5/6]:facialmesenchyme[5/6]
chr8	32063683	32067187	PMID:23375746	Human_element1719_negative
chr8	32064662	32066126		Human_element1742_negative
chr9	2240936	2242833		Human_element1743_positive_neuraltube[4/4]:hindbrain(rhombencephalon)[4/4]:midbrain(mesencephalon)[4/4]:forebrain[4/4]:trigeminalV(ganglion,cranial)[4/4]:cranialnerve[4/4]
chr9	82224085	82226757	PMID:23375746	Human_element1078_positive_neuraltube[7/8]:hindbrain(rhombencephalon)[7/8]:midbrain(mesencephalon)[7/8]:forebrain[7/8]:cranialnerve[7/8]
chr9	129198400	129200739		Human_element186_positive_midbrain(mesencephalon)[6/8]
chr11	16190865	16192453		Human_element1720_positive_branchialarch[5/8]
chr11	31622822	31624118		Human_element565_positive_midbrain(mesencephalon)[8/10]:forebrain[8/10]
chr12	102863674	102866150	PIMD:24159046	Mouse_element694_positive_limb[6/10]:branchialarch[6/10]:nose[7/10]:tail[7/10]:facialmesenchyme[7/10]:other[7/10]
chr15	37240805	37242498		Human_element181_positive_midbrain(mesencephalon)[4/4]
chr18	22657391	22658788	PMID:23375746	Human_element1104_negative
