# Supplementary material for: Comprehensive identification and analysis of human accelerated regulatory DNA
Source: HighWire-hosted journal article supplement (doi:10.1101/gr.192591.115), 2015-06-23
Supplement: Supplemental_Table_4.xlsx [file Supplemental_Table_4.xlsx]

## Sheet: Sheet1
number	cell_type	date	rep1_H	rep2_H	rep3_H	rep4_H	rep5_H	rep6_H	rep7_H	rep8_H	rep1_C	rep2_C	rep3_C	rep4_C	rep5_C	rep6_C	rep7_C	rep8_C	pGL3-rep1	pGL3-rep2	pGL3-rep3	pGL3-rep4	pGL3-rep5	pGL3-rep6	allele difference (two sided), t test	Human greater than negative (one sided), t test, norm	Chimp greater than negative (one sided), t test, norm
1	imr90	1_08_14	0.152499	NA	NA	0.190746	0.188269	NA	NA	NA	0.0920221	0.0839911	0.136513	0.104853	0.105648	NA	NA	NA	0.0666836	0.0808755	0.118832	0.132126	NA	NA	0.00847051	0.00376885	0.337996
2	sknmc	4_18_14	0.831245	0.807362	0.969939	0.445756	0.654202	NA	NA	NA	0.358246	0.462191	0.618584	0.750391	0.620647	NA	NA	NA	0.704139	0.593067	0.465656	0.54058	0.523884	NA	0.151543	0.060152	0.518026
3	imr90	1_08_14	0.0522688	0.0952256	0.0825057	0.0821603	0.102125	NA	NA	NA	0.0487175	0.0645417	0.060039	0.0386121	0.0375611	NA	NA	NA	0.0666836	0.0808755	0.118832	0.132126	NA	NA	0.0146402	0.917847	0.999988
3	sknmc	12_12_13	0.769989	1.09237	0.792239	1.47713	0.705331	NA	NA	NA	0.898527	0.599826	0.605508	0.694127	0.716573	NA	NA	NA	0.979903	0.788305	0.720152	1.01896	NA	NA	0.144598	0.283334	0.986209
4	sknmc	4_18_14	0.635463	0.562882	0.517151	0.793745	0.684965	NA	NA	NA	0.61278	0.806566	0.73452	0.425317	0.746589	NA	NA	NA	0.704139	0.593067	0.465656	0.54058	0.523884	NA	0.760709	0.111523	0.111985
5	sknmc	2_21_14	0.637443	0.98365	0.972754	0.853416	0.684678	NA	NA	NA	0.911452	0.626437	0.462301	0.761424	0.844938	NA	NA	NA	0.649539	0.610195	0.5923	0.40781	NA	NA	0.357991	0.00911902	0.0623016
6	sknmc	2_21_14	0.451939	0.719425	0.598491	0.673229	0.569936	NA	NA	NA	0.78496	0.641143	0.586233	0.486509	0.812122	NA	NA	NA	0.649539	0.610195	0.5923	0.40781	NA	NA	0.460079	0.248226	0.0979747
7	imr90	1_08_14	0.0957777	0.0666871	0.140555	0.074264	0.0580205	NA	NA	NA	0.0449084	0.104659	0.0629553	0.144813	0.0909357	NA	NA	NA	0.0666836	0.0808755	0.118832	0.132126	NA	NA	0.912083	0.762974	0.691946
8	imr90	1_17_14	0.295529	0.0889623	0.16886	0.149839	0.0786927	NA	NA	NA	0.235261	0.231414	0.139239	0.352488	0.0909883	NA	NA	NA	0.0801974	0.100614	0.0858704	0.11541	NA	NA	0.395071	0.0967888	0.0315958
8	sknmc	12_12_13	1.12677	0.754893	0.802633	0.866768	0.953282	NA	NA	NA	1.17053	0.979415	1.42419	1.06672	0.789118	NA	NA	NA	0.979903	0.788305	0.720152	1.01896	NA	NA	0.180841	0.372476	0.058903
9	sknmc	12_05_13	0.981319	1.28761	0.759033	NA	NA	NA	NA	NA	0.478324	0.899261	1.13609	NA	NA	NA	NA	NA	0.819566	0.649715	NA	NA	NA	NA	0.525926	0.106224	0.323078
10	imr90	3_14_14	0.131289	NA	0.202412	0.361477	0.131672	NA	NA	NA	0.177815	0.178908	0.232642	NA	0.090184	NA	NA	NA	0.156198	0.109072	0.159458	0.0954996	0.103224	NA	0.578749	0.113859	0.111816
10	sknmc	3_14_14	0.491978	0.867926	0.576964	0.878981	0.530957	NA	NA	NA	1.03714	0.893802	0.699603	0.921455	0.791365	NA	NA	NA	0.600517	0.705283	0.851136	0.844372	0.608278	NA	0.0917725	0.798963	0.0558022
11	sknmc	12_18_13	0.307088	0.924889	0.654413	0.924453	0.648469	NA	NA	NA	0.649171	0.599144	0.985452	0.971742	0.484881	NA	NA	NA	0.979903	0.788305	0.720152	1.01896	NA	NA	0.770087	0.909169	0.87565
12	imr90	3_14_14	0.152577	NA	0.108614	0.127121	NA	NA	NA	NA	0.144765	0.129083	0.154295	0.236905	0.175389	NA	NA	NA	0.156198	0.109072	0.159458	0.0954996	0.103224	NA	0.139394	0.382555	0.0403983
12	sknmc	3_14_14	0.946072	0.819369	0.913847	0.857751	0.748346	NA	NA	NA	1.70971	1.84616	1.72093	1.19033	2.13906	NA	NA	NA	0.600517	0.705283	0.851136	0.844372	0.608278	NA	0.00402974	0.0174701	0.00141563
13	sknmc	2_21_14	0.68221	0.677245	0.590597	0.438779	0.595055	NA	NA	NA	0.56804	0.427421	0.511362	0.489661	0.459514	NA	NA	NA	0.649539	0.610195	0.5923	0.40781	NA	NA	0.0783635	0.274681	0.975596
14	imr90	1_08_14	0.096472	0.142579	0.0997152	0.0736864	0.183336	NA	NA	NA	0.0419836	0.123936	0.11972	0.102051	0.0859721	NA	NA	NA	0.0666836	0.0808755	0.118832	0.132126	NA	NA	0.350271	0.195349	0.611571
14	sknmc	12_12_13	0.653051	0.869619	0.840502	0.745786	0.815057	NA	NA	NA	1.01387	0.823795	1.20835	0.805563	1.22852	NA	NA	NA	0.979903	0.788305	0.720152	1.01896	NA	NA	0.0614857	0.95915	0.101153
15	sknmc	12_12_13	0.543327	0.764005	0.804519	0.879357	0.884582	NA	NA	NA	0.824267	0.943835	0.987077	1.31079	0.853693	NA	NA	NA	0.979903	0.788305	0.720152	1.01896	NA	NA	0.0902757	0.907016	0.14626
16	imr90	3_14_14	0.0821671	NA	0.142648	0.14866	0.168931	NA	NA	NA	0.168584	0.103105	0.195364	0.129237	0.138894	NA	NA	NA	0.156198	0.109072	0.159458	0.0954996	0.103224	NA	0.657217	0.307807	0.126206
16	sknmc	3_14_14	1.45369	1.71934	1.41691	1.41935	0.872985	NA	NA	NA	1.37323	1.06502	0.861065	1.18639	0.97136	NA	NA	NA	0.600517	0.705283	0.851136	0.844372	0.608278	NA	0.126677	0.00479454	0.00788461
17	sknmc	12_12_13	1.00741	0.827447	0.680797	1.03436	0.831412	NA	NA	NA	0.47808	0.591196	0.746872	0.649843	0.619019	NA	NA	NA	0.979903	0.788305	0.720152	1.01896	NA	NA	0.0129892	0.502983	0.999341
18	imr90	3_20_14	NA	0.174346	NA	0.112503	0.237467	NA	NA	NA	0.130746	0.0770377	0.303829	0.15881	0.180059	NA	NA	NA	0.13653	0.211221	0.148	0.145725	0.201411	NA	0.931721	0.44039	0.485084
18	sknmc	3_20_14	0.850685	0.771572	0.993161	0.966588	1.05642	NA	NA	NA	0.972778	1.00585	1.00567	0.87547	1.04405	NA	NA	NA	1.16961	0.937606	1.09988	0.951959	1.04721	NA	0.399814	0.953479	0.931204
19	sknmc	2_21_14	0.791255	1.00153	0.94794	0.836423	0.968197	NA	NA	NA	0.829867	0.97171	0.97051	0.620296	0.72532	NA	NA	NA	0.649539	0.610195	0.5923	0.40781	NA	NA	0.321977	6.31177e-05	0.00803942
20	sknmc	12_05_13	0.46688	0.555606	0.512015	NA	NA	NA	NA	NA	0.667767	0.767769	0.693372	NA	NA	NA	NA	NA	0.819566	0.649715	NA	NA	NA	NA	0.00784873	0.999802	0.726842
21	sknmc	12_05_13	0.331953	0.449369	0.422117	NA	NA	NA	NA	NA	0.619011	0.496043	0.448168	NA	NA	NA	NA	NA	0.819566	0.649715	NA	NA	NA	NA	0.133779	0.999467	0.984176
22	imr90	3_06_14	0.107477	0.143607	0.167777	0.0935293	0.120463	NA	NA	NA	0.182948	0.119627	0.125984	0.129134	0.224683	NA	NA	NA	0.0934819	NA	0.171959	0.293909	NA	NA	0.260238	0.997087	0.887073
22	sknmc	3_06_14	1.10938	0.460801	0.869798	0.953412	0.801652	NA	NA	NA	0.623656	0.805206	1.5212	1.16289	0.821507	NA	NA	NA	1.06964	0.759744	1.23453	0.500274	NA	NA	0.467189	0.670146	0.291596
23	sknmc	2_21_14	0.43809	0.591301	0.368274	0.590815	0.461345	NA	NA	NA	0.543627	0.578814	0.532021	0.58431	0.345289	NA	NA	NA	0.649539	0.610195	0.5923	0.40781	NA	NA	0.677708	0.908901	0.813474
24	sknmc	12_18_13	1.25728	1.56241	1.26516	0.673739	1.06736	1.66371	1.7988	1.32772	0.983915	1.73381	1.17479	0.846689	1.13989	0.901264	1.28913	0.848646	0.819566	0.649715	0.979903	0.788305	0.720152	1.01896	0.2188	0.00445587	0.0301486
25	imr90	1_08_14	0.091175	0.149365	0.0876206	0.120481	0.174113	NA	NA	NA	0.124909	0.162341	0.108261	0.186806	0.141593	NA	NA	NA	0.0666836	0.0808755	0.118832	0.132126	NA	NA	0.378459	0.111638	0.0127046
25	sknmc	12_05_13	0.892736	1.07937	0.857842	NA	NA	NA	NA	NA	0.775302	0.841463	0.735386	NA	NA	NA	NA	NA	0.819566	0.649715	NA	NA	NA	NA	0.132336	0.039247	0.132649
26	sknmc	3_06_14	1.20634	1.8066	1.08051	1.9243	1.6352	NA	NA	NA	1.03148	0.85728	1.02429	0.990173	1.0378	NA	NA	NA	1.06964	0.759744	1.23453	0.500274	NA	NA	0.0292365	0.00869246	0.0225329
26	imr90	3_20_14	NA	0.228414	0.282599	0.258949	0.181286	NA	NA	NA	NA	0.177561	NA	0.0697943	0.329745	NA	NA	NA	0.13653	0.211221	0.148	0.145725	0.201411	NA	0.613608	0.0219566	0.391377
26	sknmc	3_20_14	1.18816	1.69164	1.62102	1.43407	1.98315	NA	NA	NA	1.4996	1.68483	1.21252	1.33984	1.54371	NA	NA	NA	1.16961	0.937606	1.09988	0.951959	1.04721	NA	0.441676	0.00690796	0.00269096
27	imr90	3_06_14	0.108565	0.107653	0.215631	0.137865	0.110901	NA	NA	NA	0.154085	0.0640681	0.0857515	0.165529	0.0854057	NA	NA	NA	0.0934819	NA	0.171959	0.293909	NA	NA	0.411448	0.965262	0.991431
28	sknmc	3_20_14	0.674326	1.16886	0.785925	0.972157	0.82462	NA	NA	NA	1.33871	0.897408	0.865642	1.16652	1.03172	NA	NA	NA	1.16961	0.937606	1.09988	0.951959	1.04721	NA	0.191373	0.928241	0.422904
29	imr90	12_18_13	NA	0.167091	NA	NA	0.145811	NA	NA	NA	0.109952	0.121672	0.200754	0.181873	0.188401	NA	NA	NA	0.124188	NA	0.139277	0.15162	NA	NA	0.856602	0.144034	0.157551
29	sknmc	12_12_13	0.670377	0.914072	1.14424	0.95083	1.05325	0.692277	0.635671	0.842727	1.26676	1.38117	1.10961	1.54954	0.944322	1.17703	1.42398	0.892641	0.819566	0.649715	0.979903	0.788305	0.720152	1.01896	0.00476984	0.575971	0.00184956
30	imr90	3_14_14	NA	NA	0.106181	0.15816	0.15535	NA	NA	NA	0.0489832	0.131269	0.104207	0.122457	0.116592	NA	NA	NA	0.156198	0.109072	0.159458	0.0954996	0.103224	NA	0.178351	0.236369	0.86712
30	sknmc	3_14_14	0.787032	0.971479	1.31399	1.1139	0.718397	NA	NA	NA	1.2567	1.2505	1.16361	1.30256	1.18257	NA	NA	NA	0.600517	0.705283	0.851136	0.844372	0.608278	NA	0.081365	0.0500525	1.52733e-09
31	imr90	1_08_14	0.15316	0.0846356	0.0734539	0.123488	0.251696	NA	NA	NA	0.0811401	0.157592	0.110351	NA	0.0993147	NA	NA	NA	0.0666836	0.0808755	0.118832	0.132126	NA	NA	0.509365	0.154245	0.260758
31	sknmc	12_18_13	1.03694	0.799994	1.07339	1.09752	0.826527	NA	NA	NA	1.05949	1.76462	1.42453	0.971014	0.912467	NA	NA	NA	0.979903	0.788305	0.720152	1.01896	NA	NA	0.192378	0.120629	0.0478808
32	imr90	1_08_14	0.123336	0.0685169	0.12027	0.111539	NA	NA	NA	NA	0.0862597	0.0709209	0.0899544	0.0653768	0.0502535	NA	NA	NA	0.0666836	0.0808755	0.118832	0.132126	NA	NA	0.0728137	0.342727	0.990173
32	sknmc	12_05_13	0.195822	0.95402	0.260697	NA	NA	NA	NA	NA	0.739034	0.769341	0.383753	NA	NA	NA	NA	NA	0.819566	0.649715	NA	NA	NA	NA	0.597401	0.805217	0.754401
33	sknmc	12_12_13	0.893536	0.800921	0.999394	0.961273	0.688034	NA	NA	NA	0.846737	0.920491	0.970199	0.861568	0.784124	NA	NA	NA	0.979903	0.788305	0.720152	1.01896	NA	NA	0.905599	0.550678	0.501993
34	sknmc	12_18_13	0.685504	0.990488	1.02764	1.52969	1.02932	NA	NA	NA	0.893779	1.01212	0.695517	0.617772	0.931236	NA	NA	NA	0.979903	0.788305	0.720152	1.01896	NA	NA	0.198638	0.133598	0.711356
35	sknmc	12_12_13	0.605956	0.414835	0.640947	0.631173	0.635743	NA	NA	NA	0.468306	0.660564	0.261038	0.573998	0.402648	NA	NA	NA	0.979903	0.788305	0.720152	1.01896	NA	NA	0.211467	0.999681	0.998717
36	imr90	3_06_14	0.214707	0.177066	0.259736	0.126586	0.144819	NA	NA	NA	0.0927402	0.130653	0.135228	0.192005	0.0781664	NA	NA	NA	0.0934819	NA	0.171959	0.293909	NA	NA	0.0970487	0.528099	0.983143
36	sknmc	3_06_14	1.47922	0.798575	0.847314	1.02613	0.807265	NA	NA	NA	0.790648	0.866731	0.891042	0.965454	0.466828	NA	NA	NA	1.06964	0.759744	1.23453	0.500274	NA	NA	0.248092	0.241179	0.827505
37	imr90	3_06_14	0.0963279	0.176509	0.200049	0.167427	0.0827221	NA	NA	NA	0.135392	0.251561	0.152231	0.10349	0.167186	NA	NA	NA	0.0934819	NA	0.171959	0.293909	NA	NA	0.622854	0.925859	0.805339
37	sknmc	3_06_14	0.835393	1.10756	1.00934	1.08092	0.949568	NA	NA	NA	1.13874	0.978632	0.925553	1.28268	0.885479	NA	NA	NA	1.06964	0.759744	1.23453	0.500274	NA	NA	0.622486	0.0502302	0.0554968
38	imr90	3_20_14	NA	0.204973	0.187122	0.124805	0.354632	NA	NA	NA	0.251866	0.204861	0.148518	0.143968	0.231205	NA	NA	NA	0.13653	0.211221	0.148	0.145725	0.201411	NA	0.702729	0.193856	0.141848
38	sknmc	3_20_14	1.02882	1.38602	0.7525	1.562	1.52442	NA	NA	NA	2.54132	1.71586	1.73916	1.41097	1.9825	NA	NA	NA	1.16961	0.937606	1.09988	0.951959	1.04721	NA	0.0347047	0.126277	0.00546378
39	sknmc	2_21_14	0.442322	0.419875	0.30208	0.468753	0.630431	NA	NA	NA	0.617687	0.537721	0.644963	0.733073	0.692591	NA	NA	NA	0.649539	0.610195	0.5923	0.40781	NA	NA	0.018548	0.948424	0.042356
	renilla	firefly	date	type	cell
	1661	708	3_27_14	exp	imr90
	7382	816	3_27_14	exp	imr90
	1650	644	3_27_14	exp	imr90
	2786	527	3_27_14	exp	imr90
	2805	1081	3_27_14	exp	imr90
	2247	700	3_27_14	exp	imr90
	695	714	3_27_14	exp	imr90
	2698	3245	3_27_14	exp	imr90
	1093	1307	3_27_14	exp	imr90
	1720	666	3_27_14	exp	imr90
	763	365	3_27_14	exp	imr90
	949	614	3_27_14	exp	imr90
	1569	564	3_27_14	exp	imr90
	10118	3136	3_27_14	exp	imr90
	2017	701	3_27_14	exp	imr90
	3692	562	3_27_14	exp	imr90
	754	583	3_27_14	exp	imr90
	541	390	3_27_14	exp	imr90
	1908	383	3_27_14	exp	imr90
	1276	414	3_27_14	exp	imr90
	2991	651	3_27_14	exp	imr90
	3263	377	3_27_14	exp	imr90
	1882	569	3_27_14	exp	imr90
	3228	889	3_27_14	exp	imr90
	1743	471	3_27_14	exp	imr90
	645	445	3_27_14	exp	imr90
	1198	615	3_27_14	exp	imr90
	1542	575	3_27_14	exp	imr90
	1072	579	3_27_14	exp	imr90
	9958	971	3_27_14	exp	imr90
	1044	597	3_27_14	exp	imr90
	756	513	3_27_14	exp	imr90
	655	536	3_27_14	exp	imr90
	675	458	3_27_14	exp	imr90
	849	451	3_27_14	exp	imr90
	693	474	3_27_14	exp	imr90
	1501	783	3_27_14	exp	imr90
	1545	586	3_27_14	exp	imr90
	4283	699	3_27_14	exp	imr90
	1466	1046	3_27_14	exp	imr90
	1099	662	3_27_14	exp	imr90
	2032	675	3_27_14	exp	imr90
	1272	655	3_27_14	exp	imr90
	2079	594	3_27_14	exp	imr90
	1067	691	3_27_14	exp	imr90
	435	431	3_27_14	exp	imr90
	376	365	3_27_14	exp	imr90
	535	418	3_27_14	exp	imr90
	813	361	3_27_14	exp	imr90
	2298	483	3_27_14	exp	imr90
	729	424	3_27_14	exp	imr90
	901	494	3_27_14	exp	imr90
	664	463	3_27_14	exp	imr90
	1681	416	3_27_14	exp	imr90
	952	479	3_27_14	exp	imr90
	1023	563	3_27_14	exp	imr90
	1714	465	3_27_14	exp	imr90
	882	426	3_27_14	exp	imr90
	1412	757	3_27_14	exp	imr90
	2462	1001	3_27_14	exp	imr90
	644	811	3_27_14	exp	imr90
	3123	801	3_27_14	exp	imr90
	2130	393	3_27_14	exp	imr90
	1502	543	3_27_14	exp	imr90
	570	407	3_27_14	exp	imr90
	6437	606	3_27_14	exp	imr90
	2214	445	3_27_14	exp	imr90
	3229	764	3_27_14	exp	imr90
	831	403	3_27_14	exp	imr90
	1337	497	3_27_14	exp	imr90
	1274	404	3_27_14	exp	imr90
	415	435	3_27_14	exp	imr90
	744	715	3_27_14	exp	imr90
	4780	480	3_27_14	exp	imr90
	415	377	3_27_14	exp	imr90
	1424	413	3_27_14	exp	imr90
	695	476	3_27_14	exp	imr90
	3777	500	3_27_14	exp	imr90
	439	389	3_27_14	exp	imr90
	1744	434	3_27_14	exp	imr90
	2336	364	3_27_14	ctl	imr90
	2747	496	3_27_14	ctl	imr90
	1835	408	3_27_14	ctl	imr90
	4656	548	3_27_14	ctl	imr90
	959	409	3_20_14	exp	imr90
	2380	494	3_20_14	exp	imr90
	576	425	3_20_14	exp	imr90
	2252	426	3_20_14	exp	imr90
	4360	612	3_20_14	exp	imr90
	919	605	3_20_14	exp	imr90
	458	357	3_20_14	exp	imr90
	1258	560	3_20_14	exp	imr90
	860	415	3_20_14	exp	imr90
	888	477	3_20_14	exp	imr90
	1899	420	3_20_14	exp	imr90
	3397	776	3_20_14	exp	imr90
	5209	1472	3_20_14	exp	imr90
	9107	2358	3_20_14	exp	imr90
	7161	1298	3_20_14	exp	imr90
	1683	509	3_20_14	exp	imr90
	5166	917	3_20_14	exp	imr90
	2159	612	3_20_14	exp	imr90
	12732	889	3_20_14	exp	imr90
	2740	904	3_20_14	exp	imr90
	863	537	3_20_14	exp	imr90
	4637	950	3_20_14	exp	imr90
	4877	913	3_20_14	exp	imr90
	3788	473	3_20_14	exp	imr90
	3329	1181	3_20_14	exp	imr90
	5666	1427	3_20_14	exp	imr90
	4024	824	3_20_14	exp	imr90
	8210	1219	3_20_14	exp	imr90
	18269	2630	3_20_14	exp	imr90
	10052	2324	3_20_14	exp	imr90
	2346	579	3_20_14	exp	imr90
	2865	500	3_20_14	exp	imr90
	2102	751	3_20_14	exp	imr90
	5909	665	3_20_14	exp	imr90
	3814	906	3_20_14	exp	imr90
	7199	941	3_20_14	exp	imr90
	7851	605	3_20_14	exp	imr90
	3500	1063	3_20_14	exp	imr90
	7090	1126	3_20_14	exp	imr90
	5216	939	3_20_14	exp	imr90
	6295	860	3_20_14	ctl	imr90
	7912	1671	3_20_14	ctl	imr90
	10867	1608	3_20_14	ctl	imr90
	5739	836	3_20_14	ctl	imr90
	3430	691	3_20_14	ctl	imr90
	1306	880	3_20_14	exp	sknmc
	1283	1499	3_20_14	exp	sknmc
	1016	799	3_20_14	exp	sknmc
	1925	1872	3_20_14	exp	sknmc
	1316	1085	3_20_14	exp	sknmc
	861	1153	3_20_14	exp	sknmc
	548	492	3_20_14	exp	sknmc
	793	687	3_20_14	exp	sknmc
	787	918	3_20_14	exp	sknmc
	738	761	3_20_14	exp	sknmc
	3738	4441	3_20_14	exp	sknmc
	3902	6601	3_20_14	exp	sknmc
	2448	3968	3_20_14	exp	sknmc
	1862	2670	3_20_14	exp	sknmc
	2932	5814	3_20_14	exp	sknmc
	1012	1517	3_20_14	exp	sknmc
	2345	3951	3_20_14	exp	sknmc
	2604	3157	3_20_14	exp	sknmc
	2307	3091	3_20_14	exp	sknmc
	1584	2446	3_20_14	exp	sknmc
	1506	1549	3_20_14	exp	sknmc
	4382	6074	3_20_14	exp	sknmc
	5379	4048	3_20_14	exp	sknmc
	4190	6545	3_20_14	exp	sknmc
	3864	5890	3_20_14	exp	sknmc
	3960	10063	3_20_14	exp	sknmc
	3700	6348	3_20_14	exp	sknmc
	4048	7041	3_20_14	exp	sknmc
	5128	7236	3_20_14	exp	sknmc
	3338	6617	3_20_14	exp	sknmc
	460	391	3_20_14	exp	sknmc
	539	416	3_20_14	exp	sknmc
	380	378	3_20_14	exp	sknmc
	380	367	3_20_14	exp	sknmc
	353	373	3_20_14	exp	sknmc
	430	418	3_20_14	exp	sknmc
	393	395	3_20_14	exp	sknmc
	388	391	3_20_14	exp	sknmc
	452	396	3_20_14	exp	sknmc
	388	405	3_20_14	exp	sknmc
	2243	2624	3_20_14	ctl	sknmc
	3356	3147	3_20_14	ctl	sknmc
	2606	2866	3_20_14	ctl	sknmc
	1782	1696	3_20_14	ctl	sknmc
	2290	2398	3_20_14	ctl	sknmc
	1748	366	3_14_14	exp	imr90
	2452	374	3_14_14	exp	imr90
	3577	380	3_14_14	exp	imr90
	2596	411	3_14_14	exp	imr90
	2921	454	3_14_14	exp	imr90
	11020	540	3_14_14	exp	imr90
	3404	447	3_14_14	exp	imr90
	4115	429	3_14_14	exp	imr90
	6726	824	3_14_14	exp	imr90
	4659	543	3_14_14	exp	imr90
	5613	737	3_14_14	exp	imr90
	1861	632	3_14_14	exp	imr90
	3176	643	3_14_14	exp	imr90
	3039	1099	3_14_14	exp	imr90
	7494	987	3_14_14	exp	imr90
	3667	652	3_14_14	exp	imr90
	3349	599	3_14_14	exp	imr90
	4010	933	3_14_14	exp	imr90
	2309	689	3_14_14	exp	imr90
	7059	637	3_14_14	exp	imr90
	3820	583	3_14_14	exp	imr90
	1972	457	3_14_14	exp	imr90
	5304	576	3_14_14	exp	imr90
	5480	697	3_14_14	exp	imr90
	1650	469	3_14_14	exp	imr90
	5414	784	3_14_14	exp	imr90
	4301	555	3_14_14	exp	imr90
	4520	697	3_14_14	exp	imr90
	2553	605	3_14_14	exp	imr90
	2969	521	3_14_14	exp	imr90
	7546	620	3_14_14	exp	imr90
	1802	423	3_14_14	exp	imr90
	5066	723	3_14_14	exp	imr90
	5165	768	3_14_14	exp	imr90
	3497	591	3_14_14	exp	imr90
	4215	711	3_14_14	exp	imr90
	5452	562	3_14_14	exp	imr90
	5738	1121	3_14_14	exp	imr90
	3269	423	3_14_14	exp	imr90
	6193	860	3_14_14	exp	imr90
	3245	507	3_14_14	ctl	imr90
	7270	793	3_14_14	ctl	imr90
	3760	600	3_14_14	ctl	imr90
	6064	579	3_14_14	ctl	imr90
	5666	585	3_14_14	ctl	imr90
	2044	1608	3_14_14	exp	sknmc
	2602	2527	3_14_14	exp	sknmc
	2676	3516	3_14_14	exp	sknmc
	1738	1936	3_14_14	exp	sknmc
	3805	2734	3_14_14	exp	sknmc
	2483	3121	3_14_14	exp	sknmc
	1937	2422	3_14_14	exp	sknmc
	1795	2089	3_14_14	exp	sknmc
	1701	2215	3_14_14	exp	sknmc
	1670	1974	3_14_14	exp	sknmc
	2742	1349	3_14_14	exp	sknmc
	1578	1370	3_14_14	exp	sknmc
	1709	986	3_14_14	exp	sknmc
	1991	1750	3_14_14	exp	sknmc
	1919	1019	3_14_14	exp	sknmc
	2867	2974	3_14_14	exp	sknmc
	1780	1591	3_14_14	exp	sknmc
	1839	1287	3_14_14	exp	sknmc
	1650	1520	3_14_14	exp	sknmc
	857	678	3_14_14	exp	sknmc
	1526	1444	3_14_14	exp	sknmc
	2534	2076	3_14_14	exp	sknmc
	2424	2215	3_14_14	exp	sknmc
	2420	2076	3_14_14	exp	sknmc
	1995	1493	3_14_14	exp	sknmc
	2353	4022	3_14_14	exp	sknmc
	1660	3064	3_14_14	exp	sknmc
	1917	3299	3_14_14	exp	sknmc
	2780	3309	3_14_14	exp	sknmc
	1841	3938	3_14_14	exp	sknmc
	1635	2376	3_14_14	exp	sknmc
	1787	3073	3_14_14	exp	sknmc
	2328	3299	3_14_14	exp	sknmc
	2048	2907	3_14_14	exp	sknmc
	2885	2518	3_14_14	exp	sknmc
	1787	2454	3_14_14	exp	sknmc
	2126	2264	3_14_14	exp	sknmc
	2484	2139	3_14_14	exp	sknmc
	2222	2636	3_14_14	exp	sknmc
	2703	2625	3_14_14	exp	sknmc
	6770	4065	3_14_14	ctl	sknmc
	3512	2477	3_14_14	ctl	sknmc
	4913	4182	3_14_14	ctl	sknmc
	553	467	3_14_14	ctl	sknmc
	2897	1762	3_14_14	ctl	sknmc
	5103	492	3_6_14	exp	imr90
	3532	624	3_6_14	exp	imr90
	4467	894	3_6_14	exp	imr90
	2807	470	3_6_14	exp	imr90
	6804	563	3_6_14	exp	imr90
	4541	615	3_6_14	exp	imr90
	2836	713	3_6_14	exp	imr90
	3491	532	3_6_14	exp	imr90
	5132	531	3_6_14	exp	imr90
	3180	532	3_6_14	exp	imr90
	5975	649	3_6_14	exp	imr90
	9932	1069	3_6_14	exp	imr90
	6350	1369	3_6_14	exp	imr90
	5783	797	3_6_14	exp	imr90
	7155	794	3_6_14	exp	imr90
	6798	1048	3_6_14	exp	imr90
	9072	581	3_6_14	exp	imr90
	8901	763	3_6_14	exp	imr90
	6286	1041	3_6_14	exp	imr90
	16563	1415	3_6_14	exp	imr90
	8186	880	3_6_14	exp	imr90
	7484	1075	3_6_14	exp	imr90
	5239	879	3_6_14	exp	imr90
	10183	952	3_6_14	exp	imr90
	8831	1064	3_6_14	exp	imr90
	6250	1144	3_6_14	exp	imr90
	16423	1965	3_6_14	exp	imr90
	6492	818	3_6_14	exp	imr90
	7412	957	3_6_14	exp	imr90
	7007	1574	3_6_14	exp	imr90
	9102	851	3_6_14	ctl	imr90
	1531	542	3_6_14	ctl	imr90
	6862	1473	3_6_14	exp	imr90
	12548	2222	3_6_14	exp	imr90
	5585	1451	3_6_14	exp	imr90
	9112	1153	3_6_14	exp	imr90
	7491	1085	3_6_14	exp	imr90
	10336	959	3_6_14	exp	imr90
	11874	1551	3_6_14	exp	imr90
	6990	945	3_6_14	exp	imr90
	5156	990	3_6_14	exp	imr90
	10945	856	3_6_14	exp	imr90
	5061	870	3_6_14	ctl	imr90
	3072	903	3_6_14	ctl	imr90
	899	1085	3_6_14	exp	sknmc
	2092	3779	3_6_14	exp	sknmc
	5811	6279	3_6_14	exp	sknmc
	2036	3918	3_6_14	exp	sknmc
	1253	2049	3_6_14	exp	sknmc
	1642	1694	3_6_14	exp	sknmc
	1453	1246	3_6_14	exp	sknmc
	1186	1214	3_6_14	exp	sknmc
	3765	3728	3_6_14	exp	sknmc
	2323	2411	3_6_14	exp	sknmc
	2161	1805	3_6_14	exp	sknmc
	3354	3715	3_6_14	exp	sknmc
	2943	2970	3_6_14	exp	sknmc
	3648	3943	3_6_14	exp	sknmc
	2431	2308	3_6_14	exp	sknmc
	3761	4283	3_6_14	exp	sknmc
	3753	3673	3_6_14	exp	sknmc
	2411	2232	3_6_14	exp	sknmc
	2969	3808	3_6_14	exp	sknmc
	2085	1846	3_6_14	exp	sknmc
	3428	3802	3_6_14	exp	sknmc
	7818	3603	3_6_14	exp	sknmc
	2131	1854	3_6_14	exp	sknmc
	2398	2286	3_6_14	exp	sknmc
	896	718	3_6_14	exp	sknmc
	949	592	3_6_14	exp	sknmc
	930	749	3_6_14	exp	sknmc
	1604	2440	3_6_14	exp	sknmc
	2136	2484	3_6_14	exp	sknmc
	910	748	3_6_14	exp	sknmc
	536	573	3_6_14	ctl	sknmc
	921	700	3_6_14	ctl	sknmc
	1461	2161	3_6_14	exp	sknmc
	2218	1771	3_6_14	exp	sknmc
	3514	2978	3_6_14	exp	sknmc
	3560	3653	3_6_14	exp	sknmc
	3171	2560	3_6_14	exp	sknmc
	2827	2235	3_6_14	exp	sknmc
	2391	2073	3_6_14	exp	sknmc
	2152	1918	3_6_14	exp	sknmc
	2776	2680	3_6_14	exp	sknmc
	4124	1925	3_6_14	exp	sknmc
	765	944	3_6_14	ctl	sknmc
	1822	911	3_6_14	ctl	sknmc
	995	365	12_18_13	exp	imr90
	1477	428	12_18_13	exp	imr90
	1351	446	12_18_13	exp	imr90
	2571	467	12_18_13	exp	imr90
	2642	582	12_18_13	exp	imr90
	1316	398	12_18_13	exp	imr90
	1035	459	12_18_13	exp	imr90
	2364	725	12_18_13	exp	imr90
	467	371	12_18_13	exp	imr90
	564	387	12_18_13	exp	imr90
	605	414	12_18_13	exp	imr90
	795	433	12_18_13	exp	imr90
	1433	666	12_18_13	exp	imr90
	6532	1241	12_18_13	exp	imr90
	1743	535	12_18_13	exp	imr90
	2178	806	12_18_13	exp	imr90
	1417	427	12_18_13	exp	imr90
	3637	641	12_18_13	exp	imr90
	917	451	12_18_13	exp	imr90
	708	482	12_18_13	exp	imr90
	1870	427	12_18_13	exp	imr90
	4238	708	12_18_13	exp	imr90
	1518	435	12_18_13	exp	imr90
	993	396	12_18_13	exp	imr90
	4106	599	12_18_13	exp	imr90
	8310	914	12_18_13	exp	imr90
	6247	760	12_18_13	exp	imr90
	3741	751	12_18_13	exp	imr90
	3651	664	12_18_13	exp	imr90
	5099	961	12_18_13	exp	imr90
	6278	780	12_18_13	ctl	imr90
	1601	401	12_18_13	ctl	imr90
	9671	2569	12_18_13	exp	imr90
	1163	1805	12_18_13	exp	imr90
	5329	1429	12_18_13	exp	imr90
	2203	1226	12_18_13	exp	imr90
	2484	1423	12_18_13	exp	imr90
	6959	765	12_18_13	exp	imr90
	2654	591	12_18_13	exp	imr90
	4957	741	12_18_13	exp	imr90
	6852	687	12_18_13	exp	imr90
	11029	1064	12_18_13	exp	imr90
	7278	1014	12_18_13	ctl	imr90
	5196	788	12_18_13	ctl	imr90
	3108	954	12_18_13	exp	sknmc
	3142	2906	12_18_13	exp	sknmc
	1540	1008	12_18_13	exp	sknmc
	1370	1267	12_18_13	exp	sknmc
	2629	1705	12_18_13	exp	sknmc
	1351	877	12_18_13	exp	sknmc
	1705	1022	12_18_13	exp	sknmc
	1471	1450	12_18_13	exp	sknmc
	1086	1056	12_18_13	exp	sknmc
	1677	813	12_18_13	exp	sknmc
	382	362	12_18_13	exp	sknmc
	1879	1288	12_18_13	exp	sknmc
	4058	4019	12_18_13	exp	sknmc
	2938	3019	12_18_13	exp	sknmc
	4601	7038	12_18_13	exp	sknmc
	1218	1253	12_18_13	exp	sknmc
	2681	2396	12_18_13	exp	sknmc
	1864	1887	12_18_13	exp	sknmc
	2860	1989	12_18_13	exp	sknmc
	989	611	12_18_13	exp	sknmc
	394	367	12_18_13	exp	sknmc
	5646	3804	12_18_13	exp	sknmc
	4960	5294	12_18_13	exp	sknmc
	3716	6183	12_18_13	exp	sknmc
	4114	7400	12_18_13	exp	sknmc
	3203	4253	12_18_13	exp	sknmc
	3777	3198	12_18_13	exp	sknmc
	3245	3699	12_18_13	exp	sknmc
	5664	5104	12_18_13	exp	sknmc
	4365	5627	12_18_13	exp	sknmc
	2682	2276	12_18_13	exp	sknmc
	2699	2799	12_18_13	exp	sknmc
	7116	5693	12_18_13	exp	sknmc
	6579	7062	12_18_13	exp	sknmc
	4616	5066	12_18_13	exp	sknmc
	514	425	12_18_13	exp	sknmc
	931	987	12_18_13	exp	sknmc
	1867	3295	12_18_13	exp	sknmc
	1057	1505	12_18_13	exp	sknmc
	531	516	12_18_13	exp	sknmc
	415	378	12_18_13	exp	sknmc
	12673	1214	1_08_14	exp	imr90
	20254	1351	1_08_14	exp	imr90
	6100	857	1_08_14	exp	imr90
	16787	1247	1_08_14	exp	imr90
	13749	798	1_08_14	exp	imr90
	20940	940	1_08_14	exp	imr90
	15438	1616	1_08_14	exp	imr90
	18958	1194	1_08_14	exp	imr90
	15863	2297	1_08_14	exp	imr90
	11609	1056	1_08_14	exp	imr90
	3049	376	1_08_14	exp	imr90
	5880	403	1_08_14	exp	imr90
	3171	381	1_08_14	exp	imr90
	3789	423	1_08_14	exp	imr90
	2356	375	1_08_14	exp	imr90
	14819	1278	1_08_14	exp	imr90
	18571	1317	1_08_14	exp	imr90
	10027	902	1_08_14	exp	imr90
	19914	1302	1_08_14	exp	imr90
	31401	1578	1_08_14	exp	imr90
	15698	821	1_08_14	exp	imr90
	18997	1809	1_08_14	exp	imr90
	11710	966	1_08_14	exp	imr90
	10713	880	1_08_14	exp	imr90
	8727	891	1_08_14	exp	imr90
	25734	1254	1_08_14	exp	imr90
	24336	1571	1_08_14	exp	imr90
	18869	1133	1_08_14	exp	imr90
	21203	819	1_08_14	exp	imr90
	32603	1225	1_08_14	exp	imr90
	15385	1026	1_08_14	ctl	imr90
	13291	1075	1_08_14	ctl	imr90
	14392	1312	1_08_14	exp	imr90
	10255	1532	1_08_14	exp	imr90
	8570	751	1_08_14	exp	imr90
	12936	1559	1_08_14	exp	imr90
	5307	924	1_08_14	exp	imr90
	48251	6027	1_08_14	exp	imr90
	11404	1851	1_08_14	exp	imr90
	11217	1214	1_08_14	exp	imr90
	17085	3192	1_08_14	exp	imr90
	9778	1385	1_08_14	exp	imr90
	10096	1200	1_08_14	ctl	imr90
	8974	1186	1_08_14	ctl	imr90
	9367	1429	1_08_14	exp	imr90
	1532	488	1_08_14	exp	imr90
	1494	504	1_08_14	exp	imr90
	5457	1041	1_08_14	exp	imr90
	3737	704	1_08_14	exp	imr90
	20305	1869	1_08_14	exp	imr90
	30989	2603	1_08_14	exp	imr90
	15887	2169	1_08_14	exp	imr90
	17627	1848	1_08_14	exp	imr90
	11700	1236	1_08_14	exp	imr90
	5405	828	1_08_14	exp	imr90
	8543	723	1_08_14	exp	imr90
	10249	753	1_08_14	exp	imr90
	5736	708	1_08_14	exp	imr90
	3185	802	1_08_14	exp	imr90
	7557	613	1_08_14	exp	imr90
	10616	1673	1_08_14	exp	imr90
	5216	576	1_08_14	exp	imr90
	1576	501	1_08_14	exp	imr90
	5165	513	1_08_14	exp	imr90
	24521	2366	1_08_14	exp	imr90
	13456	1919	1_08_14	exp	imr90
	10357	1033	1_08_14	exp	imr90
	22098	1628	1_08_14	exp	imr90
	9982	1830	1_08_14	exp	imr90
	20051	842	1_08_14	exp	imr90
	14005	1736	1_08_14	exp	imr90
	8571	1026	1_08_14	exp	imr90
	23264	2374	1_08_14	exp	imr90
	11978	1030	1_08_14	exp	imr90
