# Supplementary material for: Comprehensive identification and analysis of human accelerated regulatory DNA
Source: HighWire-hosted journal article supplement (doi:10.1101/gr.192591.115), 2015-06-23
Supplement: Supplemental_Table_5.xlsx [file Supplemental_Table_5.xlsx]

## Sheet: Sheet1
conserved DHS or haDHS?	category	term	ID	number of reference genes in category	number of genes in foreground set in category	expected number of genes in category	ratio of enrichment	raw P value	adjusted P value
consDHS	biological process	single-organism process	GO:0044699	7682	4937	4699.51	1.05	4.13e-16	1.59e-12
consDHS	biological process	single-multicellular organism process	GO:0044707	5612	3643	3433.18	1.06	1.22e-13	2.35e-10
consDHS	biological process	multicellular organismal process	GO:0032501	5644	3656	3452.75	1.06	7.04e-13	9.03e-10
consDHS	biological process	anatomical structure development	GO:0048856	4030	2650	2465.38	1.07	1.06e-12	1.02e-09
consDHS	biological process	anatomical structure morphogenesis	GO:0009653	2055	1390	1257.16	1.11	3.41e-11	2.19e-08
consDHS	biological process	system development	GO:0048731	3521	2318	2154	1.08	3.41e-11	2.19e-08
consDHS	biological process	signaling	GO:0023052	4646	3019	2842.22	1.06	5.72e-11	2.75e-08
consDHS	biological process	single organism signaling	GO:0044700	4646	3019	2842.22	1.06	5.72e-11	2.75e-08
consDHS	biological process	cell communication	GO:0007154	4770	3092	2918.08	1.06	1.52e-10	6.5e-08
consDHS	biological process	multicellular organismal development	GO:0007275	4077	2657	2494.13	1.07	3.42e-10	1.32e-07
consDHS	biological process	organ morphogenesis	GO:0009887	802	572	490.63	1.17	4.11e-10	1.44e-07
consDHS	biological process	anatomical structure formation involved in morphogenesis	GO:0048646	1594	1085	975.14	1.11	8.74e-10	2.8e-07
consDHS	biological process	developmental process	GO:0032502	4572	2960	2796.95	1.06	1.19e-09	3.52e-07
consDHS	biological process	cellular component organization or biogenesis	GO:0071840	4222	2736	2582.84	1.06	4.82e-09	1.32e-06
consDHS	biological process	cellular component organization	GO:0016043	4105	2661	2511.26	1.06	7.73e-09	1.98e-06
consDHS	biological process	cell development	GO:0048468	1461	990	893.78	1.11	2.21e-08	5.31e-06
consDHS	biological process	organ development	GO:0048513	2552	1681	1561.2	1.08	4.01e-08	9.07e-06
consDHS	biological process	neuron differentiation	GO:0030182	990	683	605.64	1.13	7.19e-08	1.54e-05
consDHS	biological process	cellular component organization or biogenesis at cellular level	GO:0071841	3420	2223	2092.21	1.06	7.77e-08	1.57e-05
consDHS	biological process	cellular component organization at cellular level	GO:0071842	3317	2158	2029.2	1.06	8.84e-08	1.66e-05
consDHS	biological process	system process	GO:0003008	1695	1135	1036.93	1.09	9.08e-08	1.66e-05
consDHS	biological process	cellular component morphogenesis	GO:0032989	1000	688	611.76	1.12	1.25e-07	2.19e-05
consDHS	biological process	generation of neurons	GO:0048699	1073	733	656.41	1.12	2.73e-07	4.57e-05
consDHS	biological process	cell morphogenesis	GO:0000902	945	650	578.11	1.12	3.01e-07	4.82e-05
consDHS	biological process	heart development	GO:0007507	375	275	229.41	1.2	3.59e-07	5.3e-05
consDHS	biological process	neuron development	GO:0048666	798	554	488.18	1.13	3.72e-07	5.3e-05
consDHS	biological process	regulation of multicellular organismal process	GO:0051239	1772	1179	1084.03	1.09	3.69e-07	5.3e-05
consDHS	biological process	signal transduction	GO:0007165	4139	2663	2532.06	1.05	4.14e-07	5.69e-05
consDHS	biological process	cellular response to stimulus	GO:0051716	5034	3216	3079.58	1.04	5.75e-07	7.37e-05
consDHS	biological process	regulation of multicellular organismal development	GO:2000026	1098	747	671.71	1.11	5.59e-07	7.37e-05
consDHS	biological process	cellular protein modification process	GO:0006464	2472	1619	1512.26	1.07	6.58e-07	7.91e-05
consDHS	biological process	protein modification process	GO:0036211	2472	1619	1512.26	1.07	6.58e-07	7.91e-05
consDHS	biological process	cell projection organization	GO:0030030	934	640	571.38	1.12	8.54e-07	9.95e-05
consDHS	biological process	neuron projection development	GO:0031175	704	490	430.68	1.14	1.11e-06	0.0001
consDHS	biological process	cell part morphogenesis	GO:0032990	691	480	422.72	1.14	2.05e-06	0.0002
consDHS	biological process	cell projection morphogenesis	GO:0048858	679	472	415.38	1.14	2.21e-06	0.0002
consDHS	biological process	cellular component assembly	GO:0022607	1547	1031	946.39	1.09	1.44e-06	0.0002
consDHS	biological process	macromolecule modification	GO:0043412	2566	1673	1569.77	1.07	2.05e-06	0.0002
consDHS	biological process	nervous system development	GO:0007399	1724	1142	1054.67	1.08	2.08e-06	0.0002
consDHS	biological process	neurogenesis	GO:0022008	1140	769	697.4	1.1	2.75e-06	0.0002
consDHS	biological process	neurological system process	GO:0050877	1237	831	756.74	1.1	2.82e-06	0.0002
consDHS	biological process	response to stimulus	GO:0050896	6636	4194	4059.62	1.03	2.5e-06	0.0002
consDHS	biological process	tissue development	GO:0009888	1449	968	886.44	1.09	1.71e-06	0.0002
consDHS	biological process	tissue morphogenesis	GO:0048729	472	336	288.75	1.16	2.42e-06	0.0002
consDHS	biological process	cellular component biogenesis	GO:0044085	1690	1117	1033.87	1.08	5e-06	0.0004
consDHS	biological process	urogenital system development	GO:0001655	292	215	178.63	1.2	4.15e-06	0.0004
consDHS	biological process	cellular protein metabolic process	GO:0044267	3263	2103	1996.16	1.05	6.81e-06	0.0005
consDHS	biological process	regulation of anatomical structure morphogenesis	GO:0022603	591	412	361.55	1.14	6.26e-06	0.0005
consDHS	biological process	cell morphogenesis involved in differentiation	GO:0000904	704	485	430.68	1.13	7.72e-06	0.0006
consDHS	biological process	negative regulation of biological process	GO:0048519	3110	2005	1902.56	1.05	1.1e-05	0.0008
consDHS	biological process	sensory organ development	GO:0007423	436	309	266.73	1.16	1.11e-05	0.0008
consDHS	biological process	cardiovascular system development	GO:0072358	754	516	461.26	1.12	1.27e-05	0.0009
consDHS	biological process	circulatory system development	GO:0072359	754	516	461.26	1.12	1.27e-05	0.0009
consDHS	biological process	neuron projection morphogenesis	GO:0048812	583	405	356.65	1.14	1.28e-05	0.0009
consDHS	biological process	renal system development	GO:0072001	252	186	154.16	1.21	1.41e-05	0.001
consDHS	biological process	cellular component assembly at cellular level	GO:0071844	1129	756	690.67	1.09	1.6e-05	0.0011
consDHS	biological process	sensory perception	GO:0007600	495	347	302.82	1.15	1.57e-05	0.0011
consDHS	biological process	sensory perception of light stimulus	GO:0050953	205	154	125.41	1.23	1.53e-05	0.0011
consDHS	biological process	visual perception	GO:0007601	204	153	124.8	1.23	1.89e-05	0.0012
consDHS	biological process	cellular process	GO:0009987	12899	7970	7891.05	1.01	2.07e-05	0.0013
consDHS	biological process	heart morphogenesis	GO:0003007	172	131	105.22	1.24	2.04e-05	0.0013
consDHS	biological process	intracellular signal transduction	GO:0035556	1902	1245	1163.56	1.07	2e-05	0.0013
consDHS	biological process	response to inorganic substance	GO:0010035	423	299	258.77	1.16	2.15e-05	0.0013
consDHS	biological process	phosphorylation	GO:0016310	1268	843	775.71	1.09	2.46e-05	0.0015
consDHS	biological process	kidney development	GO:0001822	208	155	127.25	1.22	3.04e-05	0.0018
consDHS	biological process	cell morphogenesis involved in neuron differentiation	GO:0048667	575	397	351.76	1.13	3.77e-05	0.0022
consDHS	biological process	cellular developmental process	GO:0048869	2829	1823	1730.66	1.05	3.74e-05	0.0022
consDHS	biological process	cardiac muscle tissue development	GO:0048738	130	101	79.53	1.27	4.32e-05	0.0024
consDHS	biological process	cell-cell signaling	GO:0007267	1099	733	672.32	1.09	4.69e-05	0.0026
consDHS	biological process	regulation of developmental process	GO:0050793	1436	947	878.48	1.08	4.7e-05	0.0026
consDHS	biological process	response to chemical stimulus	GO:0042221	2746	1769	1679.88	1.05	5.55e-05	0.003
consDHS	biological process	cell-cell adhesion	GO:0016337	404	284	247.15	1.15	6.57e-05	0.0035
consDHS	biological process	phosphorus metabolic process	GO:0006793	2501	1615	1530	1.06	6.57e-05	0.0035
consDHS	biological process	positive regulation of molecular function	GO:0044093	1087	724	664.98	1.09	6.76e-05	0.0035
consDHS	biological process	protein phosphorylation	GO:0006468	1120	745	685.17	1.09	6.77e-05	0.0035
consDHS	biological process	regulation of biomineral tissue development	GO:0070167	66	55	40.38	1.36	8.17e-05	0.0041
consDHS	biological process	response to wounding	GO:0009611	1109	737	678.44	1.09	8.8e-05	0.0044
consDHS	biological process	cardiac chamber development	GO:0003205	110	86	67.29	1.28	0.0001	0.0046
consDHS	biological process	cardiac muscle cell differentiation	GO:0055007	65	54	39.76	1.36	0.0001	0.0046
consDHS	biological process	central nervous system development	GO:0007417	688	467	420.89	1.11	0.0001	0.0046
consDHS	biological process	phosphate-containing compound metabolic process	GO:0006796	2438	1572	1491.46	1.05	0.0001	0.0046
consDHS	biological process	positive regulation of macromolecule metabolic process	GO:0010604	1842	1198	1126.86	1.06	0.0001	0.0046
consDHS	biological process	regulation of molecular function	GO:0065009	1799	1172	1100.55	1.06	0.0001	0.0046
consDHS	biological process	axonogenesis	GO:0007409	526	361	321.78	1.12	0.0002	0.0083
consDHS	biological process	cardiac chamber morphogenesis	GO:0003206	97	76	59.34	1.28	0.0002	0.0083
consDHS	biological process	cell differentiation	GO:0030154	2665	1711	1630.33	1.05	0.0002	0.0083
consDHS	biological process	cellular response to stress	GO:0033554	1193	788	729.83	1.08	0.0002	0.0083
consDHS	biological process	embryonic digit morphogenesis	GO:0042733	45	39	27.53	1.42	0.0002	0.0083
consDHS	biological process	morphogenesis of an epithelium	GO:0002009	370	259	226.35	1.14	0.0002	0.0083
consDHS	biological process	negative regulation of cellular process	GO:0048523	2840	1819	1737.39	1.05	0.0002	0.0083
consDHS	biological process	positive regulation of cellular process	GO:0048522	3113	1991	1904.4	1.05	0.0002	0.0083
consDHS	biological process	regulation of cell development	GO:0060284	495	341	302.82	1.13	0.0002	0.0083
consDHS	biological process	response to external stimulus	GO:0009605	1323	869	809.35	1.07	0.0002	0.0083
consDHS	biological process	forebrain development	GO:0030900	281	200	171.9	1.16	0.0003	0.0111
consDHS	biological process	muscle organ morphogenesis	GO:0048644	65	53	39.76	1.33	0.0003	0.0111
consDHS	biological process	positive regulation of catalytic activity	GO:0043085	895	596	547.52	1.09	0.0003	0.0111
consDHS	biological process	positive regulation of inflammatory response	GO:0050729	72	58	44.05	1.32	0.0003	0.0111
consDHS	biological process	positive regulation of phosphorylation	GO:0042327	568	387	347.48	1.11	0.0003	0.0111
consDHS	biological process	positive regulation of protein metabolic process	GO:0051247	865	577	529.17	1.09	0.0003	0.0111
consDHS	biological process	positive regulation of protein modification process	GO:0031401	711	479	434.96	1.1	0.0003	0.0111
consDHS	biological process	positive regulation of protein phosphorylation	GO:0001934	554	378	338.91	1.12	0.0003	0.0111
consDHS	biological process	regulation of organ morphogenesis	GO:2000027	147	110	89.93	1.22	0.0003	0.0111
consDHS	biological process	response to cadmium ion	GO:0046686	35	31	21.41	1.45	0.0003	0.0111
consDHS	biological process	tube development	GO:0035295	436	301	266.73	1.13	0.0003	0.0111
consDHS	biological process	cell cycle process	GO:0022402	1062	701	649.69	1.08	0.0004	0.0135
consDHS	biological process	central nervous system neuron differentiation	GO:0021953	124	94	75.86	1.24	0.0004	0.0135
consDHS	biological process	ear development	GO:0043583	183	134	111.95	1.2	0.0004	0.0135
consDHS	biological process	epithelium development	GO:0060429	604	409	369.5	1.11	0.0004	0.0135
consDHS	biological process	homophilic cell adhesion	GO:0007156	140	105	85.65	1.23	0.0004	0.0135
consDHS	biological process	pattern specification process	GO:0007389	432	298	264.28	1.13	0.0004	0.0135
consDHS	biological process	regulation of catalytic activity	GO:0050790	1425	930	871.75	1.07	0.0004	0.0135
consDHS	biological process	regulation of nervous system development	GO:0051960	440	303	269.17	1.13	0.0004	0.0135
consDHS	biological process	regulation of neurogenesis	GO:0050767	397	275	242.87	1.13	0.0004	0.0135
consDHS	biological process	regulation of neuron differentiation	GO:0045664	331	232	202.49	1.15	0.0004	0.0135
consDHS	biological process	digestive tract development	GO:0048565	110	84	67.29	1.25	0.0005	0.0154
consDHS	biological process	gastrulation with mouth forming second	GO:0001702	30	27	18.35	1.47	0.0005	0.0154
consDHS	biological process	localization	GO:0051179	4167	2637	2549.19	1.03	0.0005	0.0154
consDHS	biological process	positive regulation of metabolic process	GO:0009893	1981	1278	1211.89	1.05	0.0005	0.0154
consDHS	biological process	protein complex biogenesis	GO:0070271	776	518	474.72	1.09	0.0005	0.0154
consDHS	biological process	regionalization	GO:0003002	309	217	189.03	1.15	0.0005	0.0154
consDHS	biological process	regulation of bone mineralization	GO:0030500	60	49	36.71	1.33	0.0005	0.0154
consDHS	biological process	regulation of cellular response to growth factor stimulus	GO:0090287	53	44	32.42	1.36	0.0005	0.0154
consDHS	biological process	regulation of heart contraction	GO:0008016	113	86	69.13	1.24	0.0005	0.0154
consDHS	biological process	regulation of protein modification process	GO:0031399	1004	663	614.2	1.08	0.0005	0.0154
consDHS	biological process	response to metal ion	GO:0010038	259	184	158.44	1.16	0.0005	0.0154
consDHS	biological process	biological adhesion	GO:0022610	956	632	584.84	1.08	0.0006	0.0168
consDHS	biological process	brain development	GO:0007420	502	342	307.1	1.11	0.0006	0.0168
consDHS	biological process	cell adhesion	GO:0007155	954	631	583.62	1.08	0.0006	0.0168
consDHS	biological process	cell surface receptor signaling pathway	GO:0007166	2325	1492	1422.33	1.05	0.0006	0.0168
consDHS	biological process	heart contraction	GO:0060047	135	101	82.59	1.22	0.0006	0.0168
consDHS	biological process	heart process	GO:0003015	135	101	82.59	1.22	0.0006	0.0168
consDHS	biological process	kidney morphogenesis	GO:0060993	49	41	29.98	1.37	0.0006	0.0168
consDHS	biological process	muscle tissue development	GO:0060537	311	218	190.26	1.15	0.0006	0.0168
consDHS	biological process	protein complex assembly	GO:0006461	773	516	472.89	1.09	0.0006	0.0168
consDHS	biological process	regulation of biological quality	GO:0065008	2511	1608	1536.12	1.05	0.0006	0.0168
consDHS	biological process	regulation of cell death	GO:0010941	1196	784	731.66	1.07	0.0006	0.0168
consDHS	biological process	regulation of protein metabolic process	GO:0051246	1413	921	864.41	1.07	0.0006	0.0168
consDHS	biological process	death	GO:0016265	1706	1104	1043.66	1.06	0.0007	0.0187
consDHS	biological process	embryonic morphogenesis	GO:0048598	495	337	302.82	1.11	0.0007	0.0187
consDHS	biological process	intracellular protein kinase cascade	GO:0007243	867	575	530.39	1.08	0.0007	0.0187
consDHS	biological process	protein metabolic process	GO:0019538	3896	2467	2383.4	1.04	0.0007	0.0187
consDHS	biological process	regeneration	GO:0031099	131	98	80.14	1.22	0.0007	0.0187
consDHS	biological process	regulation of apoptotic process	GO:0042981	1153	756	705.36	1.07	0.0007	0.0187
consDHS	biological process	regulation of programmed cell death	GO:0043067	1167	765	713.92	1.07	0.0007	0.0187
consDHS	biological process	cation transport	GO:0006812	634	426	387.85	1.1	0.0008	0.0208
consDHS	biological process	muscle organ development	GO:0007517	340	236	208	1.13	0.0008	0.0208
consDHS	biological process	positive regulation of phosphate metabolic process	GO:0045937	636	427	389.08	1.1	0.0008	0.0208
consDHS	biological process	positive regulation of phosphorus metabolic process	GO:0010562	636	427	389.08	1.1	0.0008	0.0208
consDHS	biological process	apoptotic process	GO:0006915	1528	991	934.76	1.06	0.0009	0.0222
consDHS	biological process	cell death	GO:0008219	1704	1102	1042.43	1.06	0.0009	0.0222
consDHS	biological process	eye development	GO:0001654	276	194	168.84	1.15	0.0009	0.0222
consDHS	biological process	inner ear development	GO:0048839	157	115	96.05	1.2	0.0009	0.0222
consDHS	biological process	positive regulation of biological process	GO:0048518	3439	2182	2103.83	1.04	0.0009	0.0222
consDHS	biological process	regulation of ossification	GO:0030278	157	115	96.05	1.2	0.0009	0.0222
consDHS	biological process	response to reactive oxygen species	GO:0000302	136	101	83.2	1.21	0.0009	0.0222
consDHS	biological process	striated muscle tissue development	GO:0014706	299	209	182.92	1.14	0.0009	0.0222
consDHS	biological process	positive regulation of cell differentiation	GO:0045597	498	338	304.65	1.11	0.001	0.024
consDHS	biological process	positive regulation of cellular protein metabolic process	GO:0032270	794	527	485.73	1.08	0.001	0.024
consDHS	biological process	regulation of cell-matrix adhesion	GO:0001952	58	47	35.48	1.32	0.001	0.024
consDHS	biological process	regulation of signal transduction	GO:0009966	1777	1147	1087.09	1.06	0.001	0.024
consDHS	biological process	behavior	GO:0007610	508	344	310.77	1.11	0.0011	0.0255
consDHS	biological process	programmed cell death	GO:0012501	1545	1001	945.16	1.06	0.0011	0.0255
consDHS	biological process	regulation of cell communication	GO:0010646	2034	1307	1244.31	1.05	0.0011	0.0255
consDHS	biological process	regulation of localization	GO:0032879	1327	864	811.8	1.06	0.0011	0.0255
consDHS	biological process	regulation of phosphorus metabolic process	GO:0051174	1216	794	743.9	1.07	0.0011	0.0255
consDHS	biological process	synapse organization	GO:0050808	135	100	82.59	1.21	0.0011	0.0255
consDHS	biological process	cellular calcium ion homeostasis	GO:0006874	251	177	153.55	1.15	0.0012	0.0268
consDHS	biological process	lung development	GO:0030324	156	114	95.43	1.19	0.0012	0.0268
consDHS	biological process	multicellular organismal signaling	GO:0035637	751	499	459.43	1.09	0.0012	0.0268
consDHS	biological process	positive regulation of developmental process	GO:0051094	682	455	417.22	1.09	0.0012	0.0268
consDHS	biological process	regulation of cellular protein metabolic process	GO:0032268	1250	815	764.7	1.07	0.0012	0.0268
consDHS	biological process	respiratory tube development	GO:0030323	159	116	97.27	1.19	0.0012	0.0268
consDHS	biological process	calcium ion homeostasis	GO:0055074	262	184	160.28	1.15	0.0013	0.0278
consDHS	biological process	embryonic appendage morphogenesis	GO:0035113	109	82	66.68	1.23	0.0013	0.0278
consDHS	biological process	embryonic limb morphogenesis	GO:0030326	109	82	66.68	1.23	0.0013	0.0278
consDHS	biological process	embryonic skeletal system development	GO:0048706	109	82	66.68	1.23	0.0013	0.0278
consDHS	biological process	muscle structure development	GO:0061061	450	306	275.29	1.11	0.0013	0.0278
consDHS	biological process	odontogenesis	GO:0042476	103	78	63.01	1.24	0.0013	0.0278
consDHS	biological process	regulation of cell projection organization	GO:0031344	256	180	156.61	1.15	0.0013	0.0278
consDHS	biological process	synaptic transmission	GO:0007268	651	435	398.25	1.09	0.0013	0.0278
consDHS	biological process	axon guidance	GO:0007411	359	247	219.62	1.12	0.0014	0.0289
consDHS	biological process	cell cycle	GO:0007049	1393	904	852.18	1.06	0.0014	0.0289
consDHS	biological process	regulation of epithelial cell differentiation	GO:0030856	67	53	40.99	1.29	0.0014	0.0289
consDHS	biological process	regulation of signaling	GO:0023051	2028	1302	1240.64	1.05	0.0014	0.0289
consDHS	biological process	respiratory system development	GO:0060541	179	129	109.5	1.18	0.0014	0.0289
consDHS	biological process	response to nutrient	GO:0007584	244	172	149.27	1.15	0.0014	0.0289
consDHS	biological process	cardiac muscle contraction	GO:0060048	53	43	32.42	1.33	0.0015	0.0304
consDHS	biological process	cell cycle cytokinesis	GO:0033205	31	27	18.96	1.42	0.0015	0.0304
consDHS	biological process	palate development	GO:0060021	70	55	42.82	1.28	0.0015	0.0304
consDHS	biological process	regulation of phosphate metabolic process	GO:0019220	1204	785	736.56	1.07	0.0015	0.0304
consDHS	biological process	cell cycle checkpoint	GO:0000075	246	173	150.49	1.15	0.0016	0.0317
consDHS	biological process	morphogenesis of a branching structure	GO:0001763	196	140	119.9	1.17	0.0016	0.0317
consDHS	biological process	response to organic cyclic compound	GO:0014070	580	389	354.82	1.1	0.0016	0.0317
consDHS	biological process	Wnt receptor signaling pathway	GO:0016055	304	211	185.97	1.13	0.0016	0.0317
consDHS	biological process	dendrite morphogenesis	GO:0048813	76	59	46.49	1.27	0.0017	0.0334
consDHS	biological process	regulation of morphogenesis of a branching structure	GO:0060688	49	40	29.98	1.33	0.0017	0.0334
consDHS	biological process	cation homeostasis	GO:0055080	428	291	261.83	1.11	0.0018	0.0346
consDHS	biological process	regulation of cell differentiation	GO:0045595	1012	663	619.1	1.07	0.0018	0.0346
consDHS	biological process	response to stress	GO:0006950	2952	1875	1805.91	1.04	0.0018	0.0346
consDHS	biological process	retinal ganglion cell axon guidance	GO:0031290	18	17	11.01	1.54	0.0018	0.0346
consDHS	biological process	dendrite development	GO:0016358	126	93	77.08	1.21	0.0019	0.0356
consDHS	biological process	embryonic organ development	GO:0048568	331	228	202.49	1.13	0.0019	0.0356
consDHS	biological process	macromolecular complex assembly	GO:0065003	995	652	608.7	1.07	0.0019	0.0356
consDHS	biological process	muscle tissue morphogenesis	GO:0060415	59	47	36.09	1.3	0.0019	0.0356
consDHS	biological process	regulation of phosphorylation	GO:0042325	853	562	521.83	1.08	0.0019	0.0356
consDHS	biological process	regulation of cell-substrate adhesion	GO:0010810	101	76	61.79	1.23	0.002	0.0373
consDHS	biological process	ion transport	GO:0006811	969	635	592.79	1.07	0.0021	0.039
consDHS	biological process	biomineral tissue development	GO:0031214	113	84	69.13	1.22	0.0022	0.0405
consDHS	biological process	response to endogenous stimulus	GO:0009719	1004	657	614.2	1.07	0.0022	0.0405
consDHS	biological process	anterior/posterior axis specification	GO:0009948	41	34	25.08	1.36	0.0023	0.0411
consDHS	biological process	cytoskeleton organization	GO:0007010	796	525	486.96	1.08	0.0023	0.0411
consDHS	biological process	embryo development	GO:0009790	900	591	550.58	1.07	0.0023	0.0411
consDHS	biological process	polyol metabolic process	GO:0019751	65	51	39.76	1.28	0.0023	0.0411
consDHS	biological process	positive regulation of transferase activity	GO:0051347	437	296	267.34	1.11	0.0023	0.0411
consDHS	biological process	response to toxin	GO:0009636	226	159	138.26	1.15	0.0023	0.0411
consDHS	biological process	appendage development	GO:0048736	140	102	85.65	1.19	0.0024	0.0421
consDHS	biological process	chemotaxis	GO:0006935	595	397	364	1.09	0.0024	0.0421
consDHS	biological process	limb development	GO:0060173	140	102	85.65	1.19	0.0024	0.0421
consDHS	biological process	taxis	GO:0042330	595	397	364	1.09	0.0024	0.0421
consDHS	biological process	positive regulation of cell death	GO:0010942	442	299	270.4	1.11	0.0025	0.0435
consDHS	biological process	response to oxidative stress	GO:0006979	269	187	164.56	1.14	0.0025	0.0435
consDHS	biological process	positive regulation of transcription from RNA polymerase II promoter	GO:0045944	688	456	420.89	1.08	0.0026	0.0448
consDHS	biological process	regulation of hydrolase activity	GO:0051336	743	491	454.54	1.08	0.0026	0.0448
consDHS	biological process	execution phase of apoptosis	GO:0097194	228	160	139.48	1.15	0.0027	0.0455
consDHS	biological process	heart trabecula formation	GO:0060347	12	12	7.34	1.63	0.0027	0.0455
consDHS	biological process	regulation of cell morphogenesis	GO:0022604	300	207	183.53	1.13	0.0027	0.0455
consDHS	biological process	regulation of keratinocyte proliferation	GO:0010837	12	12	7.34	1.63	0.0027	0.0455
consDHS	biological process	wound healing	GO:0042060	627	417	383.57	1.09	0.0027	0.0455
consDHS	biological process	cardiac ventricle development	GO:0003231	90	68	55.06	1.24	0.0028	0.0466
consDHS	biological process	cellular component disassembly involved in execution phase of apoptosis	GO:0006921	74	57	45.27	1.26	0.0028	0.0466
consDHS	biological process	inositol phosphate biosynthetic process	GO:0032958	17	16	10.4	1.54	0.0028	0.0466
consDHS	biological process	appendage morphogenesis	GO:0035107	130	95	79.53	1.19	0.0029	0.0471
consDHS	biological process	cardiac muscle cell development	GO:0055013	33	28	20.19	1.39	0.0029	0.0471
consDHS	biological process	limb morphogenesis	GO:0035108	130	95	79.53	1.19	0.0029	0.0471
consDHS	biological process	positive regulation of protein kinase activity	GO:0045860	404	274	247.15	1.11	0.0029	0.0471
consDHS	biological process	regulation of heart growth	GO:0060420	33	28	20.19	1.39	0.0029	0.0471
consDHS	biological process	response to abiotic stimulus	GO:0009628	807	531	493.69	1.08	0.0029	0.0471
consDHS	biological process	epithelial cell proliferation	GO:0050673	233	163	142.54	1.14	0.003	0.0483
consDHS	biological process	skeletal system development	GO:0001501	387	263	236.75	1.11	0.003	0.0483
consDHS	biological process	microtubule-based process	GO:0007017	423	286	258.77	1.11	0.0031	0.0491
consDHS	biological process	positive regulation of hydrolase activity	GO:0051345	440	297	269.17	1.1	0.0031	0.0491
consDHS	biological process	positive regulation of kinase activity	GO:0033674	426	288	260.61	1.11	0.0031	0.0491
consDHS	biological process	regulation of protein phosphorylation	GO:0001932	801	527	490.02	1.08	0.0031	0.0491
haDHS	biological process	anatomical structure development	GO:0048856	2650	41	24.58	1.67	0.0001	0.0023
haDHS	biological process	multicellular organismal process	GO:0032501	3656	52	33.9	1.53	4.67e-05	0.0023
haDHS	biological process	organ morphogenesis	GO:0009887	572	16	5.3	3.02	5.88e-05	0.0023
haDHS	biological process	regulation of multicellular organismal development	GO:2000026	747	18	6.93	2.6	0.0001	0.0023
haDHS	biological process	regulation of multicellular organismal process	GO:0051239	1179	24	10.93	2.2	0.0001	0.0023
haDHS	biological process	single-multicellular organism process	GO:0044707	3643	52	33.78	1.54	4.17e-05	0.0023
haDHS	biological process	single-organism process	GO:0044699	4937	64	45.78	1.4	2.55e-05	0.0023
haDHS	biological process	system development	GO:0048731	2318	38	21.5	1.77	6.74e-05	0.0023
haDHS	biological process	cell development	GO:0048468	990	21	9.18	2.29	0.0002	0.0041
haDHS	biological process	multicellular organismal development	GO:0007275	2657	40	24.64	1.62	0.0003	0.0051
haDHS	biological process	organ development	GO:0048513	1681	29	15.59	1.86	0.0003	0.0051
haDHS	biological process	anatomical structure morphogenesis	GO:0009653	1390	25	12.89	1.94	0.0006	0.0074
haDHS	biological process	positive regulation of biological process	GO:0048518	2182	34	20.24	1.68	0.0006	0.0074
haDHS	biological process	positive regulation of cellular process	GO:0048522	1991	32	18.46	1.73	0.0006	0.0074
haDHS	biological process	system process	GO:0003008	1135	22	10.53	2.09	0.0005	0.0074
haDHS	biological process	developmental process	GO:0032502	2960	42	27.45	1.53	0.0007	0.0077
haDHS	biological process	enzyme linked receptor protein signaling pathway	GO:0007167	571	14	5.3	2.64	0.0007	0.0077
haDHS	biological process	positive regulation of transcription from RNA polymerase II promoter	GO:0045944	456	12	4.23	2.84	0.0009	0.0088
haDHS	biological process	regulation of developmental process	GO:0050793	947	19	8.78	2.16	0.0009	0.0088
haDHS	biological process	embryo development	GO:0009790	591	14	5.48	2.55	0.001	0.0089
haDHS	biological process	generation of neurons	GO:0048699	733	16	6.8	2.35	0.001	0.0089
haDHS	biological process	negative regulation of biosynthetic process	GO:0009890	605	14	5.61	2.5	0.0012	0.01
haDHS	biological process	negative regulation of gene expression	GO:0010629	546	13	5.06	2.57	0.0014	0.01
haDHS	biological process	nervous system development	GO:0007399	1142	21	10.59	1.98	0.0014	0.01
haDHS	biological process	neuron differentiation	GO:0030182	683	15	6.33	2.37	0.0014	0.01
haDHS	biological process	regulation of cell communication	GO:0010646	1307	23	12.12	1.9	0.0014	0.01
haDHS	biological process	negative regulation of cellular macromolecule biosynthetic process	GO:2000113	553	13	5.13	2.53	0.0016	0.0103
haDHS	biological process	negative regulation of transcription, DNA-dependent	GO:0045892	486	12	4.51	2.66	0.0016	0.0103
haDHS	biological process	neurogenesis	GO:0022008	769	16	7.13	2.24	0.0016	0.0103
haDHS	biological process	cell communication	GO:0007154	3092	42	28.67	1.46	0.0018	0.0105
haDHS	biological process	positive regulation of gene expression	GO:0010628	701	15	6.5	2.31	0.0018	0.0105
haDHS	biological process	regulation of transcription from RNA polymerase II promoter	GO:0006357	771	16	7.15	2.24	0.0017	0.0105
haDHS	biological process	negative regulation of macromolecule biosynthetic process	GO:0010558	573	13	5.31	2.45	0.0022	0.0114
haDHS	biological process	negative regulation of RNA metabolic process	GO:0051253	503	12	4.66	2.57	0.0022	0.0114
haDHS	biological process	signaling	GO:0023052	3019	41	28	1.46	0.0022	0.0114
haDHS	biological process	single organism signaling	GO:0044700	3019	41	28	1.46	0.0022	0.0114
haDHS	biological process	biological regulation	GO:0065007	5304	62	49.19	1.26	0.0023	0.0116
haDHS	biological process	positive regulation of transcription, DNA-dependent	GO:0045893	649	14	6.02	2.33	0.0024	0.0117
haDHS	biological process	cell differentiation	GO:0030154	1711	27	15.87	1.7	0.0025	0.0119
haDHS	biological process	positive regulation of cellular biosynthetic process	GO:0031328	805	16	7.47	2.14	0.0026	0.0121
haDHS	biological process	cellular developmental process	GO:0048869	1823	28	16.91	1.66	0.003	0.0125
haDHS	biological process	negative regulation of cellular biosynthetic process	GO:0031327	595	13	5.52	2.36	0.0031	0.0125
haDHS	biological process	positive regulation of biosynthetic process	GO:0009891	824	16	7.64	2.09	0.0033	0.0125
haDHS	biological process	positive regulation of developmental process	GO:0051094	455	11	4.22	2.61	0.003	0.0125
haDHS	biological process	positive regulation of RNA metabolic process	GO:0051254	673	14	6.24	2.24	0.0033	0.0125
haDHS	biological process	regulation of cell differentiation	GO:0045595	663	14	6.15	2.28	0.0029	0.0125
haDHS	biological process	regulation of cell proliferation	GO:0042127	746	15	6.92	2.17	0.0032	0.0125
haDHS	biological process	regulation of signaling	GO:0023051	1302	22	12.07	1.82	0.0031	0.0125
haDHS	biological process	transcription from RNA polymerase II promoter	GO:0006366	897	17	8.32	2.04	0.0031	0.0125
haDHS	biological process	neurological system process	GO:0050877	831	16	7.71	2.08	0.0036	0.0134
haDHS	biological process	positive regulation of macromolecule biosynthetic process	GO:0010557	760	15	7.05	2.13	0.0039	0.0142
haDHS	biological process	cellular component morphogenesis	GO:0032989	688	14	6.38	2.19	0.004	0.0143
haDHS	biological process	anatomical structure formation involved in morphogenesis	GO:0048646	1085	19	10.06	1.89	0.0042	0.0147
haDHS	biological process	positive regulation of nitrogen compound metabolic process	GO:0051173	772	15	7.16	2.1	0.0045	0.0155
haDHS	biological process	negative regulation of nucleobase-containing compound metabolic process	GO:0045934	557	12	5.17	2.32	0.005	0.0169
haDHS	biological process	cellular component assembly	GO:0022607	1031	18	9.56	1.88	0.0056	0.0183
haDHS	biological process	negative regulation of nitrogen compound metabolic process	GO:0051172	564	12	5.23	2.29	0.0055	0.0183
haDHS	biological process	negative regulation of response to stimulus	GO:0048585	494	11	4.58	2.4	0.0057	0.0183
haDHS	biological process	negative regulation of metabolic process	GO:0009892	886	16	8.22	1.95	0.0067	0.0211
haDHS	biological process	cardiovascular system development	GO:0072358	516	11	4.79	2.3	0.0078	0.0234
haDHS	biological process	circulatory system development	GO:0072359	516	11	4.79	2.3	0.0078	0.0234
haDHS	biological process	protein complex assembly	GO:0006461	516	11	4.79	2.3	0.0078	0.0234
haDHS	biological process	protein complex biogenesis	GO:0070271	518	11	4.8	2.29	0.008	0.0236
haDHS	biological process	negative regulation of macromolecule metabolic process	GO:0010605	826	15	7.66	1.96	0.0083	0.0241
haDHS	biological process	positive regulation of nucleobase-containing compound metabolic process	GO:0045935	750	14	6.96	2.01	0.0086	0.0246
haDHS	biological process	positive regulation of metabolic process	GO:0009893	1278	20	11.85	1.69	0.0114	0.0316
haDHS	biological process	regulation of biological process	GO:0050789	5001	57	46.38	1.23	0.0114	0.0316
haDHS	biological process	cellular component biogenesis	GO:0044085	1117	18	10.36	1.74	0.0126	0.034
haDHS	biological process	positive regulation of cellular metabolic process	GO:0031325	1203	19	11.16	1.7	0.0126	0.034
haDHS	biological process	cell morphogenesis involved in differentiation	GO:0000904	485	10	4.5	2.22	0.0138	0.0352
haDHS	biological process	cellular response to organic substance	GO:0071310	712	13	6.6	1.97	0.0135	0.0352
haDHS	biological process	ion transport	GO:0006811	635	12	5.89	2.04	0.0136	0.0352
haDHS	biological process	transmission of nerve impulse	GO:0019226	484	10	4.49	2.23	0.0137	0.0352
haDHS	biological process	cell surface receptor signaling pathway	GO:0007166	1492	22	13.84	1.59	0.0153	0.0379
haDHS	biological process	tissue development	GO:0009888	968	16	8.98	1.78	0.0151	0.0379
haDHS	biological process	cell morphogenesis	GO:0000902	650	12	6.03	1.99	0.0162	0.0383
haDHS	biological process	cell proliferation	GO:0008283	974	16	9.03	1.77	0.0159	0.0383
haDHS	biological process	multicellular organismal signaling	GO:0035637	499	10	4.63	2.16	0.0166	0.0383
haDHS	biological process	negative regulation of cellular metabolic process	GO:0031324	811	14	7.52	1.86	0.0163	0.0383
haDHS	biological process	protein complex subunit organization	GO:0071822	576	11	5.34	2.06	0.0168	0.0383
haDHS	biological process	regulation of signal transduction	GO:0009966	1147	18	10.64	1.69	0.0163	0.0383
haDHS	biological process	response to stimulus	GO:0050896	4194	49	38.89	1.26	0.0169	0.0383
haDHS	biological process	regulation of biological quality	GO:0065008	1608	23	14.91	1.54	0.0183	0.041
haDHS	biological process	regulation of apoptotic process	GO:0042981	756	13	7.01	1.85	0.0212	0.0469
haDHS	biological process	cytoskeleton organization	GO:0007010	525	10	4.87	2.05	0.0228	0.0499
