# Supplementary material for: Comprehensive identification and analysis of human accelerated regulatory DNA
Source: HighWire-hosted journal article supplement (doi:10.1101/gr.192591.115), 2015-06-23
Supplement: Supplemental_Table_6.xlsx [file Supplemental_Table_6.xlsx]

## Sheet: Sheet1
chr	start	stop	cell types	lnL human acceleration	lnL primate conservation	p value human acceleration	p value primate conservation	luciferase number
chr3	11642000	11642350	NHLF;PENIS_FORESKIN_KERATINOCYTE_PRIMARY_CELLS;H1_BMP4_DERIVED_MESENDODERM_CULTURED_CELLS;IMR90;HEPG2;HSMM;FETAL_KIDNEY;NHA;H1HESC;HUVEC;FETAL_LUNG;NHEK;BREAST_VHMEC;PENIS_FORESKIN_FIBROBLAST_PRIMARY_CELLS;FETAL_HEART;HMEC	24.3084	14.841	0	0
chr15	34030420	34030570	PENIS_FORESKIN_FIBROBLAST_PRIMARY_CELLS	14.4259	5.99008	0	0.00027
chr2	237776620	237776830	NHLF;PENIS_FORESKIN_KERATINOCYTE_PRIMARY_CELLS;H1_BMP4_DERIVED_MESENDODERM_CULTURED_CELLS;NHA;NHEK;PENIS_FORESKIN_FIBROBLAST_PRIMARY_CELLS	14.1933	12.1966	0	0	3
chr10	80423620	80423770	FETAL_BRAIN	12.9438	14.679	0	0	4
chr9	2622740	2623190	IMR90;HEPG2;FETAL_KIDNEY;HUVEC;FETAL_LUNG;FETAL_HEART	12.862	5.23353	0	0.00061
chr2	147187020	147187170	H1_BMP4_DERIVED_MESENDODERM_CULTURED_CELLS	12.4959	14.8278	0	0
chr9	101866180	101866470	NHLF;FETAL_BRAIN;IMR90;HSMM;K562;NHA;CD3_PRIMARY_CELLS;NHEK;PENIS_FORESKIN_FIBROBLAST_PRIMARY_CELLS	12.1623	15.2248	0	0
chr9	3968980	3969210	NHLF;IMR90;NHA;NHEK;BREAST_VHMEC;HMEC	11.4357	8.60616	0	2e-05
chr1	116854460	116854950	PENIS_FORESKIN_KERATINOCYTE_PRIMARY_CELLS;FETAL_KIDNEY;FETAL_LUNG;FETAL_HEART	11.3687	6.41801	0	0.00017	7
chr6	1287420	1287850	NHLF;PENIS_FORESKIN_KERATINOCYTE_PRIMARY_CELLS;IMR90;FETAL_KIDNEY;NHA;FETAL_LUNG;NHEK;BREAST_VHMEC;PENIS_FORESKIN_FIBROBLAST_PRIMARY_CELLS;HMEC	11.3035	13.7275	0	0	8
chr12	12735920	12736170	PENIS_FORESKIN_KERATINOCYTE_PRIMARY_CELLS;IMR90;FETAL_KIDNEY;FETAL_LUNG;BREAST_VHMEC;PENIS_FORESKIN_FIBROBLAST_PRIMARY_CELLS;HMEC	11.1454	4.84065	0	0.00093
chr10	33735040	33735190	FETAL_BRAIN	10.9297	16.4973	0	0
chr15	37242100	37242250	NHLF	10.8208	8.11558	0	3e-05
chr12	68286920	68287070	HSMM	10.4601	12.7984	0	0
chr13	109926560	109926830	NHLF;PENIS_FORESKIN_KERATINOCYTE_PRIMARY_CELLS;H1_BMP4_DERIVED_MESENDODERM_CULTURED_CELLS;IMR90;HSMM;NHA;H1HESC;FETAL_LUNG;NHEK;PENIS_FORESKIN_FIBROBLAST_PRIMARY_CELLS;FETAL_HEART	10.3645	4.40847	0	0.00149
chr14	37608260	37608410	HSMM	10.2917	5.40972	0	0.0005
chrX	133703420	133703570	K562	10.2741	4.93573	0	0.00084
chr7	134380100	134380290	NHLF;HSMM;NHA;PENIS_FORESKIN_FIBROBLAST_PRIMARY_CELLS	10.1225	4.14886	0	0.00198
chr10	4320440	4320650	FETAL_LUNG;PENIS_FORESKIN_FIBROBLAST_PRIMARY_CELLS;FETAL_HEART	9.97598	7.87197	0	4e-05
chr1	5409720	5409870	FETAL_BRAIN	9.93022	4.71312	0	0.00107	11
chr10	3628700	3628850	FETAL_BRAIN	9.89106	5.85455	0	0.00031
chr3	193662120	193662350	H1_BMP4_DERIVED_MESENDODERM_CULTURED_CELLS;FETAL_KIDNEY;H1HESC;FETAL_LUNG	9.86452	5.96396	0	0.00028
chr15	81822500	81822650	FETAL_KIDNEY	9.69953	4.24982	1e-05	0.00178
chr8	37378320	37378610	FETAL_BRAIN;FETAL_KIDNEY;NHA	9.5391	28.4999	1e-05	0
chr6	11607660	11608030	NHLF;H1_BMP4_DERIVED_MESENDODERM_CULTURED_CELLS;FETAL_BRAIN;IMR90;HSMM;FETAL_KIDNEY;NHA;HUVEC;FETAL_LUNG;PENIS_FORESKIN_FIBROBLAST_PRIMARY_CELLS;FETAL_HEART	9.52703	9.07266	1e-05	1e-05
chr2	238224280	238224470	FETAL_BRAIN;IMR90;FETAL_KIDNEY;FETAL_LUNG	9.49018	4.50125	1e-05	0.00135
chr12	97553320	97553530	HEPG2;FETAL_KIDNEY	8.96517	12.1494	1e-05	0
chr6	46012660	46012930	HSMM;FETAL_KIDNEY;HUVEC;FETAL_LUNG	8.83843	5.83469	1e-05	0.00032	13
chr4	154347700	154347930	PENIS_FORESKIN_KERATINOCYTE_PRIMARY_CELLS;IMR90;CD3_PRIMARY_CELLS;MOBILIZED_CD34_PRIMARY_CELLS;BREAST_VHMEC;HMEC	8.81391	6.35395	1e-05	0.00018
chr6	139184540	139184690	FETAL_HEART	8.78172	7.72135	1e-05	4e-05
chr5	77287045	77287210	FETAL_KIDNEY;H1HESC	8.73636	5.2085	1e-05	0.00062
chr10	114345820	114346070	FETAL_BRAIN;HSMM;NHA	8.54588	16.048	2e-05	0
chr11	31893720	31893930	PENIS_FORESKIN_KERATINOCYTE_PRIMARY_CELLS;NHEK;BREAST_VHMEC;HMEC	8.48951	3.95819	2e-05	0.00245
chr2	135118340	135118530	FETAL_BRAIN;FETAL_LUNG;FETAL_HEART	8.24279	10.5295	2e-05	0
chr6	22363400	22363710	PENIS_FORESKIN_KERATINOCYTE_PRIMARY_CELLS;HUVEC;NHEK;BREAST_VHMEC;HMEC	8.23948	7.89663	2e-05	4e-05
chr6	38428060	38428230	NHLF;IMR90;HSMM;NHA;FETAL_LUNG;BREAST_VHMEC;PENIS_FORESKIN_FIBROBLAST_PRIMARY_CELLS;HMEC	8.21109	6.94749	3e-05	0.0001
chr10	14144800	14144950	FETAL_BRAIN	8.15501	4.87244	3e-05	0.0009
chr2	79152960	79153110	FETAL_KIDNEY	8.10795	3.93897	3e-05	0.0025
chr5	4570760	4570970	H1_BMP4_DERIVED_MESENDODERM_CULTURED_CELLS;BREAST_VHMEC;HMEC	8.04697	15.2736	3e-05	0
chr11	48098900	48099110	IMR90;NHA;PENIS_FORESKIN_FIBROBLAST_PRIMARY_CELLS	8.02147	9.7893	3e-05	0
chr9	25311020	25311170	FETAL_BRAIN	7.8399	13.0114	4e-05	0
chr20	60204500	60204670	HSMM;FETAL_LUNG	7.82551	16.3044	4e-05	0
chr7	154412000	154412150	FETAL_BRAIN	7.80664	6.115	4e-05	0.00024
chr2	53341860	53342010	FETAL_BRAIN	7.7528	18.3411	4e-05	0	20
chr1	180313080	180313230	FETAL_LUNG	7.70431	5.53684	4e-05	0.00044
chr18	3262880	3263110	NHLF;PENIS_FORESKIN_KERATINOCYTE_PRIMARY_CELLS;H1_BMP4_DERIVED_MESENDODERM_CULTURED_CELLS;IMR90;HSMM;K562;NHA;CD3_PRIMARY_CELLS;HUVEC;PENIS_FORESKIN_FIBROBLAST_PRIMARY_CELLS	7.7027	3.99091	4e-05	0.00236
chr4	54809800	54810190	NHLF;FETAL_BRAIN;IMR90;HSMM;NHA;HUVEC;FETAL_LUNG;NHEK;BREAST_VHMEC;PENIS_FORESKIN_FIBROBLAST_PRIMARY_CELLS;HMEC	7.66395	10.1427	5e-05	0	21
chr3	67652720	67652970	NHLF;CD3_PRIMARY_CELLS	7.64351	6.89885	5e-05	0.0001
chr4	13145100	13145330	FETAL_BRAIN;FETAL_LUNG	7.63646	26.2028	5e-05	0
chr5	117901160	117901310	FETAL_BRAIN	7.58411	5.07918	5e-05	0.00072
chr1	107291300	107291490	HSMM;BREAST_VHMEC;HMEC	7.57172	5.25504	5e-05	0.00059
chr14	33180380	33180590	NHLF;H1_BMP4_DERIVED_MESENDODERM_CULTURED_CELLS;FETAL_BRAIN;FETAL_KIDNEY;NHA;FETAL_LUNG;PENIS_FORESKIN_FIBROBLAST_PRIMARY_CELLS;FETAL_HEART	7.54552	5.22703	5e-05	0.00061	22
chr12	97931360	97931510	FETAL_BRAIN	7.53316	20.7587	5e-05	0
chr1	2828020	2828170	FETAL_BRAIN	7.47038	19.5558	6e-05	0
chr17	31866200	31866350	FETAL_BRAIN	7.45474	4.29204	6e-05	0.0017	23
chr9	27599200	27599370	MOBILIZED_CD34_PRIMARY_CELLS;BREAST_VHMEC;HMEC	7.33141	9.89794	6e-05	0
chr8	92901340	92901490	PENIS_FORESKIN_FIBROBLAST_PRIMARY_CELLS	7.30157	5.60384	7e-05	0.00041
chr7	26765820	26765970	FETAL_BRAIN	7.30083	20.135	7e-05	0
chr3	61268940	61269090	FETAL_BRAIN	7.29822	6.86409	7e-05	0.00011	24
chr1	68925000	68925150	FETAL_LUNG	7.25755	5.50758	7e-05	0.00045
chr4	130202780	130202930	FETAL_HEART	7.24356	7.23708	7e-05	7e-05
chr10	78874325	78874475	H1HESC	7.19569	6.48941	7e-05	0.00016
chr6	1626280	1626550	FETAL_KIDNEY;MOBILIZED_CD34_PRIMARY_CELLS;FETAL_LUNG	7.16484	5.87361	8e-05	0.0003
chr1	19688220	19688655	NHLF;IMR90;HSMM;H1HESC;NHEK;BREAST_VHMEC;PENIS_FORESKIN_FIBROBLAST_PRIMARY_CELLS;HMEC	7.15007	12.4944	8e-05	0
chr11	121666020	121666190	FETAL_BRAIN;FETAL_KIDNEY	7.12819	22.6185	8e-05	0
chr5	88753800	88754130	PENIS_FORESKIN_KERATINOCYTE_PRIMARY_CELLS;FETAL_BRAIN;HSMM;K562;NHA;MOBILIZED_CD34_PRIMARY_CELLS;HUVEC;NHEK;BREAST_VHMEC;PENIS_FORESKIN_FIBROBLAST_PRIMARY_CELLS;FETAL_HEART;HMEC	7.12002	22.3764	8e-05	0	25
chr18	42879020	42879190	FETAL_BRAIN;FETAL_KIDNEY	7.07281	7.2288	8e-05	7e-05
chr10	77357520	77357810	FETAL_BRAIN;FETAL_KIDNEY	7.04549	39.3822	9e-05	0
chr3	2141600	2141930	H1_BMP4_DERIVED_MESENDODERM_CULTURED_CELLS;FETAL_BRAIN;FETAL_KIDNEY;H1HESC;FETAL_HEART	6.9342	5.4099	0.0001	0.0005
chr5	5374200	5374430	PENIS_FORESKIN_KERATINOCYTE_PRIMARY_CELLS;IMR90;HSMM;NHA	6.89755	17.9622	0.0001	0
chr2	84461280	84461490	NHEK;BREAST_VHMEC;HMEC	6.84945	10.3298	0.00011	0
chr5	91951880	91952030	H1_BMP4_DERIVED_MESENDODERM_CULTURED_CELLS	6.84944	6.46503	0.00011	0.00016
chr4	17022180	17022330	FETAL_BRAIN	6.83512	12.0181	0.00011	0
chr5	40502940	40503090	MOBILIZED_CD34_PRIMARY_CELLS	6.80483	11.9343	0.00011	0
chr8	109280460	109280650	PENIS_FORESKIN_KERATINOCYTE_PRIMARY_CELLS;H1_BMP4_DERIVED_MESENDODERM_CULTURED_CELLS;FETAL_LUNG;FETAL_HEART	6.78643	6.18171	0.00011	0.00022
chr20	19255320	19255530	FETAL_KIDNEY;FETAL_LUNG;PENIS_FORESKIN_FIBROBLAST_PRIMARY_CELLS;FETAL_HEART	6.78008	7.59925	0.00012	5e-05
chr3	114304940	114305350	IMR90;HSMM;FETAL_KIDNEY;PENIS_FORESKIN_FIBROBLAST_PRIMARY_CELLS	6.77086	25.4028	0.00012	0
chr8	110650400	110650570	H1_BMP4_DERIVED_MESENDODERM_CULTURED_CELLS;HEPG2;FETAL_KIDNEY;NHEK	6.77071	8.42827	0.00012	2e-05
chr4	105345800	105346050	FETAL_BRAIN;FETAL_KIDNEY;FETAL_LUNG;FETAL_HEART	6.75726	27.6506	0.00012	0	26
chr9	3646960	3647110	FETAL_BRAIN	6.75678	11.6713	0.00012	0
chr22	27554060	27554210	FETAL_BRAIN	6.74166	15.813	0.00012	0
chr8	62006300	62006610	FETAL_BRAIN;FETAL_KIDNEY;FETAL_HEART	6.7277	8.86859	0.00012	1e-05
chr14	60999240	60999450	PENIS_FORESKIN_KERATINOCYTE_PRIMARY_CELLS;NHEK;BREAST_VHMEC;HMEC	6.7132	4.3934	0.00012	0.00152
chr5	168313300	168313450	FETAL_HEART	6.67911	8.78195	0.00013	1e-05
chr10	128956040	128956250	PENIS_FORESKIN_FIBROBLAST_PRIMARY_CELLS;FETAL_HEART	6.66906	10.3567	0.00013	0
chr11	20047000	20047310	H1_BMP4_DERIVED_MESENDODERM_CULTURED_CELLS;FETAL_KIDNEY;FETAL_HEART	6.66147	6.95847	0.00013	0.0001
chr7	152999080	152999310	FETAL_BRAIN;FETAL_KIDNEY	6.65303	4.93916	0.00013	0.00084
chr12	80081620	80081995	NHLF;IMR90;HSMM;NHA;H1HESC;HUVEC;FETAL_HEART	6.64893	10.5651	0.00013	0	27
chr14	51750080	51750370	NHLF;H1_BMP4_DERIVED_MESENDODERM_CULTURED_CELLS;FETAL_BRAIN;IMR90;HSMM;FETAL_KIDNEY;NHA;CD3_PRIMARY_CELLS;MOBILIZED_CD34_PRIMARY_CELLS;NHEK;BREAST_VHMEC;PENIS_FORESKIN_FIBROBLAST_PRIMARY_CELLS;FETAL_HEART;HMEC	6.63283	4.2104	0.00014	0.00185
chr10	108787280	108787430	FETAL_HEART	6.62117	12.3135	0.00014	0
chr17	77967320	77967690	NHLF;PENIS_FORESKIN_KERATINOCYTE_PRIMARY_CELLS;H1_BMP4_DERIVED_MESENDODERM_CULTURED_CELLS;IMR90;HEPG2;HSMM;FETAL_KIDNEY;NHA;H1HESC;CD3_PRIMARY_CELLS;MOBILIZED_CD34_PRIMARY_CELLS;PENIS_FORESKIN_FIBROBLAST_PRIMARY_CELLS;FETAL_HEART	6.61526	11.2166	0.00014	0
chr18	38919080	38919230	FETAL_KIDNEY	6.60155	5.45349	0.00014	0.00048
chr10	34264660	34264810	FETAL_BRAIN	6.59703	11.5127	0.00014	0
chr9	14516800	14516950	FETAL_BRAIN	6.58451	20.2833	0.00014	0
chr2	111880700	111881130	NHLF;PENIS_FORESKIN_KERATINOCYTE_PRIMARY_CELLS;H1_BMP4_DERIVED_MESENDODERM_CULTURED_CELLS;FETAL_BRAIN;IMR90;HEPG2;HSMM;K562;NHA;H1HESC;CD3_PRIMARY_CELLS;HUVEC;FETAL_LUNG;NHEK;BREAST_VHMEC;PENIS_FORESKIN_FIBROBLAST_PRIMARY_CELLS;FETAL_HEART;HMEC	6.58173	5.41499	0.00014	0.0005
chr3	34354240	34354450	H1_BMP4_DERIVED_MESENDODERM_CULTURED_CELLS;FETAL_BRAIN;FETAL_KIDNEY;FETAL_LUNG	6.55512	18.1793	0.00015	0
chr4	58631220	58631370	FETAL_BRAIN	6.54384	5.87925	0.00015	0.0003
chr1	232060000	232060250	FETAL_BRAIN;HSMM;FETAL_KIDNEY;NHA;FETAL_LUNG;FETAL_HEART	6.54048	14.1611	0.00015	0
chr18	53359420	53359710	FETAL_BRAIN;FETAL_LUNG	6.51429	23.9664	0.00015	0
chr8	25372580	25372730	NHLF;FETAL_KIDNEY;NHA;FETAL_HEART	6.50688	18.6348	0.00015	0
chr14	85124260	85124410	FETAL_KIDNEY	6.5025	10.814	0.00016	0
chr13	107592900	107593050	FETAL_BRAIN	6.49239	9.56453	0.00016	1e-05
chr2	23777040	23777310	FETAL_BRAIN;PENIS_FORESKIN_FIBROBLAST_PRIMARY_CELLS	6.48864	21.4528	0.00016	0
chr1	223060080	223060230	FETAL_LUNG	6.46392	4.42215	0.00016	0.00147
chr3	56002380	56002590	FETAL_KIDNEY;NHA	6.45463	4.10994	0.00016	0.00207
chr5	73943020	73943270	PENIS_FORESKIN_KERATINOCYTE_PRIMARY_CELLS;FETAL_BRAIN;HUVEC;NHEK;BREAST_VHMEC;HMEC	6.45011	19.039	0.00016	0
chr8	108080960	108081190	NHLF;H1_BMP4_DERIVED_MESENDODERM_CULTURED_CELLS;FETAL_BRAIN;IMR90;HSMM;FETAL_KIDNEY;K562;MOBILIZED_CD34_PRIMARY_CELLS;FETAL_LUNG;PENIS_FORESKIN_FIBROBLAST_PRIMARY_CELLS;FETAL_HEART	6.43384	7.83087	0.00017	4e-05
chr14	37374900	37375090	FETAL_KIDNEY;FETAL_HEART	6.43187	11.6618	0.00017	0
chrX	31850460	31850610	BREAST_VHMEC;HMEC	6.42825	9.64093	0.00017	1e-05
chr2	215442560	215442790	PENIS_FORESKIN_KERATINOCYTE_PRIMARY_CELLS;NHA;NHEK	6.39627	12.2599	0.00017	0	28
chr3	44151640	44151790	FETAL_BRAIN	6.36092	14.3349	0.00018	0
chr2	60729340	60729490	FETAL_KIDNEY	6.3577	7.02964	0.00018	9e-05
chr5	57423280	57423670	FETAL_BRAIN;HSMM;HUVEC;FETAL_LUNG;FETAL_HEART	6.35241	21.1744	0.00018	0	29
chr13	39224700	39224850	FETAL_LUNG	6.30636	11.5216	0.00019	0
chr20	20077260	20077410	FETAL_BRAIN;FETAL_LUNG	6.29055	16.6536	0.00019	0	30
chr3	21314860	21315070	NHLF;FETAL_BRAIN;FETAL_KIDNEY;NHA;FETAL_LUNG;PENIS_FORESKIN_FIBROBLAST_PRIMARY_CELLS	6.26529	5.56443	0.0002	0.00042
chr5	167014840	167015075	PENIS_FORESKIN_KERATINOCYTE_PRIMARY_CELLS;H1_BMP4_DERIVED_MESENDODERM_CULTURED_CELLS;IMR90;FETAL_KIDNEY;NHA;H1HESC;FETAL_LUNG;BREAST_VHMEC;PENIS_FORESKIN_FIBROBLAST_PRIMARY_CELLS;HMEC	6.23073	21.9123	0.00021	0
chr2	152631660	152631890	NHLF;IMR90;K562;NHA	6.20418	4.08674	0.00021	0.00213
chr4	182271860	182272010	FETAL_KIDNEY	6.19343	15.7342	0.00022	0
chr10	25101280	25101430	FETAL_BRAIN	6.18006	10.0336	0.00022	0
chr5	164651480	164651630	FETAL_HEART	6.1759	4.06152	0.00022	0.00219
chr8	19613860	19614390	FETAL_BRAIN;IMR90;HEPG2;FETAL_KIDNEY;H1HESC;CD3_PRIMARY_CELLS;MOBILIZED_CD34_PRIMARY_CELLS;HUVEC;FETAL_LUNG	6.16883	13.3021	0.00022	0	32
chr2	31298360	31298570	FETAL_BRAIN;FETAL_KIDNEY;H1HESC;FETAL_LUNG;PENIS_FORESKIN_FIBROBLAST_PRIMARY_CELLS	6.14783	7.44714	0.00023	6e-05
chr4	85395340	85395490	FETAL_KIDNEY	6.14722	17.7362	0.00023	0
chr2	119067540	119068370	NHLF;PENIS_FORESKIN_KERATINOCYTE_PRIMARY_CELLS;H1_BMP4_DERIVED_MESENDODERM_CULTURED_CELLS;FETAL_BRAIN;HSMM;FETAL_KIDNEY;K562;NHA;H1HESC;CD3_PRIMARY_CELLS;MOBILIZED_CD34_PRIMARY_CELLS;HUVEC;PENIS_FORESKIN_FIBROBLAST_PRIMARY_CELLS;FETAL_HEART	6.13463	43.8398	0.00023	0
chr4	17070740	17070890	FETAL_BRAIN	6.10607	4.04955	0.00024	0.00221	33
chr16	82816280	82816690	H1_BMP4_DERIVED_MESENDODERM_CULTURED_CELLS;FETAL_BRAIN;HSMM;FETAL_KIDNEY;H1HESC;FETAL_HEART	6.09751	12.4904	0.00024	0
chr2	195351180	195351330	FETAL_BRAIN	6.09747	5.57971	0.00024	0.00042	34
chr11	19902800	19902950	FETAL_BRAIN	6.08322	4.56041	0.00024	0.00126
chr4	179441860	179442010	FETAL_BRAIN	6.06725	4.80797	0.00025	0.00096
chr4	93686580	93686730	FETAL_KIDNEY	6.03487	6.7327	0.00026	0.00012
chr20	9237220	9237370	FETAL_BRAIN	6.03436	8.76524	0.00026	1e-05
chr12	43150860	43151235	NHLF;PENIS_FORESKIN_KERATINOCYTE_PRIMARY_CELLS;H1_BMP4_DERIVED_MESENDODERM_CULTURED_CELLS;IMR90;HSMM;NHA;H1HESC;HUVEC;FETAL_LUNG;NHEK;BREAST_VHMEC;PENIS_FORESKIN_FIBROBLAST_PRIMARY_CELLS;HMEC	6.00962	16.305	0.00026	0
chr11	14075760	14076030	FETAL_BRAIN;FETAL_HEART	6.0095	8.22563	0.00026	2e-05
chr7	127176020	127176170	FETAL_BRAIN	6.00681	17.1493	0.00026	0
chr5	4848000	4848150	FETAL_LUNG	6.00183	21.5699	0.00027	0
chr1	97463380	97463530	FETAL_HEART	5.99481	9.60902	0.00027	1e-05
chr2	21676640	21676870	FETAL_BRAIN;IMR90	5.98741	14.2682	0.00027	0	35
chr2	12061220	12061450	FETAL_KIDNEY;K562	5.98212	13.226	0.00027	0
chr14	49440220	49440470	IMR90;NHA;PENIS_FORESKIN_FIBROBLAST_PRIMARY_CELLS	5.96738	4.35346	0.00028	0.00159	36
chrX	139438160	139438310	FETAL_HEART	5.96515	14.4343	0.00028	0
chr13	81415700	81415850	FETAL_HEART	5.94231	19.8594	0.00028	0
chr13	34611920	34612250	FETAL_BRAIN;NHA;PENIS_FORESKIN_FIBROBLAST_PRIMARY_CELLS	5.94077	12.7244	0.00028	0
chr10	125538300	125538450	PENIS_FORESKIN_KERATINOCYTE_PRIMARY_CELLS	5.9392	9.9867	0.00028	0
chr2	10111320	10111530	NHLF;PENIS_FORESKIN_KERATINOCYTE_PRIMARY_CELLS;IMR90;NHEK;BREAST_VHMEC;PENIS_FORESKIN_FIBROBLAST_PRIMARY_CELLS;HMEC	5.92847	5.73903	0.00029	0.00035
chr11	15695040	15695430	H1_BMP4_DERIVED_MESENDODERM_CULTURED_CELLS;FETAL_BRAIN;FETAL_LUNG;BREAST_VHMEC;FETAL_HEART;HMEC	5.90422	8.38267	0.00029	2e-05	37
chr4	72188260	72188410	NHLF;IMR90	5.8993	5.48547	0.0003	0.00046
chr1	72750080	72750290	H1_BMP4_DERIVED_MESENDODERM_CULTURED_CELLS;FETAL_BRAIN;FETAL_KIDNEY;CD3_PRIMARY_CELLS;MOBILIZED_CD34_PRIMARY_CELLS;HUVEC;FETAL_LUNG;PENIS_FORESKIN_FIBROBLAST_PRIMARY_CELLS;FETAL_HEART	5.88993	13.2161	0.0003	0
chr5	81518500	81518990	NHLF;PENIS_FORESKIN_KERATINOCYTE_PRIMARY_CELLS;H1_BMP4_DERIVED_MESENDODERM_CULTURED_CELLS;NHA;FETAL_LUNG;NHEK;BREAST_VHMEC;PENIS_FORESKIN_FIBROBLAST_PRIMARY_CELLS;HMEC	5.88905	16.7979	0.0003	0	38
chr8	38238020	38238350	CD3_PRIMARY_CELLS;HUVEC;FETAL_HEART	5.88312	4.80881	0.0003	0.00096
chr2	205569560	205569710	FETAL_LUNG	5.87761	19.15	0.0003	0
chr16	65043720	65043870	FETAL_LUNG	5.8631	8.40992	0.00031	2e-05	39
chr18	72842940	72843090	FETAL_LUNG	5.86292	7.54175	0.00031	5e-05
chr6	73208800	73208950	FETAL_BRAIN	5.85589	18.3516	0.00031	0
chr6	170031565	170031715	H1HESC	5.84437	5.5457	0.00031	0.00043
chr20	11176580	11176890	PENIS_FORESKIN_KERATINOCYTE_PRIMARY_CELLS;FETAL_KIDNEY;HUVEC;FETAL_LUNG;NHEK	5.83295	7.80525	0.00032	4e-05
chr6	77595580	77595790	PENIS_FORESKIN_KERATINOCYTE_PRIMARY_CELLS;IMR90;BREAST_VHMEC;PENIS_FORESKIN_FIBROBLAST_PRIMARY_CELLS;HMEC	5.82274	18.0739	0.00032	0
chr7	17572760	17573050	NHLF;PENIS_FORESKIN_KERATINOCYTE_PRIMARY_CELLS;IMR90;HSMM;NHA;MOBILIZED_CD34_PRIMARY_CELLS;NHEK;BREAST_VHMEC;PENIS_FORESKIN_FIBROBLAST_PRIMARY_CELLS;HMEC	5.81946	5.6345	0.00032	0.00039
