# Supplementary material for: Comprehensive identification and analysis of human accelerated regulatory DNA
Source: HighWire-hosted journal article supplement (doi:10.1101/gr.192591.115), 2015-06-23
Supplement: Supplemental_Table_7.xlsx [file Supplemental_Table_7.xlsx]

## Sheet: Sheet1
chr	start	stop	publication #	lnL human acc	human forward	human reverse	chimp forward	chimp reverse
9	3968920	3969210	1	19.6876	GATGCTAGGGAATTCGATCCACTGGGGTTTAGACTGGA	ATCCGAGCTCTGCAGGATTTTCAGCCTTCTGAATCTTCA	GATGCTAGGGAATTCGATCCACTGGGGTTCAGACTG
2	236773805	236774115	2	15.4092	GATGCTAGGGAATTCGATAGTGTGTCGGTCACAAAGCA	ATCCGAGCTCTGCAGGATTCTTTAACCAGCTCCCCAAA
2	237776620	237776830	3	14.1933	GATGCTAGGGAATTCGATGCCAGAATGGCACAAGAGA	ATCCGAGCTCTGCAGGATGCAAACAATTTGATCTTTGAAGG
10	80423620	80423770	4	12.9438	GATGCTAGGGAATTCGATCCAGCTTCTTCAACAGCTTG	ATCCGAGCTCTGCAGGATTCAGTGCCCTTCAAGAGACA
9	98811345	98812075	5	12.6218	GATGCTAGGGAATTCGATGAAAGCTCTCTGATGGCAGC	ATCCGAGCTCTGCAGGATTGAGATGTCAATGCCCACAT
9	101866180	101866525	6	12.0075	GATGCTAGGGAATTCGATCTTCACAGGTGGGGAAAATG	ATCCGAGCTCTGCAGGATGAGGGGTTCCCCCTTCTTAG
1	116854460	116854950	7	11.3687	GATGCTAGGGAATTCGATCTCAGTAAGGGAGAAGGGGG	ATCCGAGCTCTGCAGGATCAACCATGACACACACAAAGC		ATCCGAGCTCTGCAGGATCCAACTATGACACACACAAAGC
6	1287420	1287850	8	11.3035	GATGCTAGGGAATTCGATGGCAGTCTCCCAGTTCTCC	ATCCGAGCTCTGCAGGATTTGTCCTTTAGCAGCAAAACC	GATGCTAGGGAATTCGATAGCAGTCTCCCAGTTCTCC	ATCCGAGCTCTGCAGGATTTGTCCTTTAGTAGCAAACCCT
18	42879000	42879290	9	10.2365	GATGCTAGGGAATTCGATCCATTGGTTGAAAAGCCATT	ATCCGAGCTCTGCAGGATTGTGTCGAAGGACAACCAAA
9	82225960	82226320	10	10.0921	GATGCTAGGGAATTCGATCTGCCCCAAAGTGTCTCATT	ATCCGAGCTCTGCAGGATGCAATCTTTTAAATGCCAGCA
1	5409720	5409870	11	9.93022	GATGCTAGGGAATTCGATGTCAGTCCCCAGCAAGAGTC	ATCCGAGCTCTGCAGGATAGCATCAGGGGCTTTCAGT
5	158635020	158635355	12	8.96068	GATGCTAGGGAATTCGATTGGGCATGATTCAAGATTCA	ATCCGAGCTCTGCAGGATTGAGTTCCCTTTCTGTTCGG
6	46012660	46012930	13	8.83843	GATGCTAGGGAATTCGATTGATCCATCACCTGACAATGA	ATCCGAGCTCTGCAGGATGATGCGGTATGTTGGATCAA		ATCCGAGCTCTGCAGGATAGATGCAGTATGTTGGATCAAG
3	86986760	86986990	14	8.78181	GATGCTAGGGAATTCGATTTCTTGGAAGCAGTGTGGAA	ATCCGAGCTCTGCAGGATTGTTGTCTGATGGGTAGGCA
8	32065060	32065395	15	8.58367	GATGCTAGGGAATTCGATAAGCATCTCTGTCTGGTCAGAA	ATCCGAGCTCTGCAGGATTCCCTTAACACCCAAGGATG	GATGCTAGGGAATTCGATAAGCATCTCTGCCTGGTCAG
16	85399600	85400330	16	8.55987	GATGCTAGGGAATTCGATTCAGTTTCCCCATGTGTCAA	ATCCGAGCTCTGCAGGATTCAATTGCCCAAGTTAAATTCTC	GATGCTAGGGAATTCGATCTCATTTTCCCCATGTGTAAA
10	123064660	123064910	17	8.15363	GATGCTAGGGAATTCGATTCCAATTTTTCATTCTGCCA	ATCCGAGCTCTGCAGGATGGAGACCTCTGAAAATCCCA		ATCCGAGCTCTGCAGGATGGAGACCTCTGAAAATCCCC
11	114099820	114100210	18	8.13029	GATGCTAGGGAATTCGATGCAGAGTCGGGGTGAGTAAG	ATCCGAGCTCTGCAGGATGATTTAGAAGCAGCCGGGTA
10	123914220	123914600	19	8.00411	GATGCTAGGGAATTCGATTCCCATGTACACATCAACTGC	ATCCGAGCTCTGCAGGATGCACAGAAAGCAAATGCAGA	GATGCTAGGGAATTCGATTCCCATGTACACTTCAACTGC	ATCCGAGCTCTGCAGGATGCACAGAAAGCAAATGCAG
2	53341860	53342010	20	7.7528	GATGCTAGGGAATTCGATTGCTTATTCCTCTTTAGAGGGC	ATCCGAGCTCTGCAGGATCACCTTGCGCACATTACAAT	GATGCTAGGGAATTCGATCTGCTTATTCCTCTTTAGAGGGT	ATCCGAGCTCTGCAGGATCCACCTTGTGCACATTACAAT
4	54809800	54810190	21	7.66395	GATGCTAGGGAATTCGATCCAGGCAGATGCTGTGTAGA	ATCCGAGCTCTGCAGGATTCCCTAATGGCAAATTCATTTT
14	33180380	33180590	22	7.54552	GATGCTAGGGAATTCGATTGAATGGTTTCCCAATTCAA	ATCCGAGCTCTGCAGGATTGTTTCAAGGCCAAACATGA		ATCCGAGCTCTGCAGGATTGTTTCAAGGCCAGACATGA
17	31866200	31866350	23	7.45474	GATGCTAGGGAATTCGATTATCACCTGCAGATGGAGCC	ATCCGAGCTCTGCAGGATAGCACCATTGTAGGGCAAGA
3	61268940	61269090	24	7.29822	GATGCTAGGGAATTCGATTCTCATTGTCTTAAATTTTCATTGG	ATCCGAGCTCTGCAGGATTTTTCTTTGCTTGATCTCCCA	GATGCTAGGGAATTCGATTCTCATTGTCCTAAATTTTCATTGG
5	88753800	88754130	25	7.12002	GATGCTAGGGAATTCGATGGTTGGTGTGATGATGCAAA	ATCCGAGCTCTGCAGGATAGTGGGGGCTTCAGGAATAT
4	105345800	105346050	26	6.75726	GATGCTAGGGAATTCGATTCCAGTCTCCAAAATGCATG	ATCCGAGCTCTGCAGGATTTCCTTCAGCATAAGCAGCA
12	80081620	80081995	27	6.64893	GATGCTAGGGAATTCGATCACATGAAAATGGCTCAGCT	ATCCGAGCTCTGCAGGATTCTGGCTGCATGTGCTAAAA
2	215442560	215442790	28	6.39627	GATGCTAGGGAATTCGATGTGCTGACGAGTCAGACCTG	ATCCGAGCTCTGCAGGATTGGATTTTTGAAGTTGGCAA
5	57423280	57423670	29	6.35241	GATGCTAGGGAATTCGATTGTCAATATGAAGCCCAGGG	ATCCGAGCTCTGCAGGATGCTATCAAGAAACCTGAGAGCC
20	20077260	20077410	30	6.29055	GATGCTAGGGAATTCGATAGGCCATCGAAGTTTTGTTG	ATCCGAGCTCTGCAGGATTGTCTTGTTTGCACTCGTGA
10	114345620	114346070	31	6.28283	GATGCTAGGGAATTCGATTCGGACAGACAGAAGCTGAA	ATCCGAGCTCTGCAGGATCAGTGCTGAAAAACAACCCA	GATGCTAGGGAATTCGATTCAGACAGACAGAAGCTGAATCA
2	31298360	31298570	32	6.14783	GATGCTAGGGAATTCGATCACCCACCTAGAAGCTGCTC	ATCCGAGCTCTGCAGGATGCCTGCCTCAAAGTGAAATC
4	17070740	17070890	33	6.10607	GATGCTAGGGAATTCGATATGAAGCTGAACTCACGCCT	ATCCGAGCTCTGCAGGATGTGGGAAGAGGGTGCATTAA
2	195351180	195351330	34	6.09747	GATGCTAGGGAATTCGATGACTTGGCACTTCCTGCTTC	ATCCGAGCTCTGCAGGATTGAACATGGCGTAGGATCAA		ATCCGAGCTCTGCAGGATTGAACATGGCATAGGATCAA
2	21676640	21676870	35	5.98741	GATGCTAGGGAATTCGATCTCCAGAGAAACCAATGCGT	ATCCGAGCTCTGCAGGATGGCAGGAAGAGCTCTAGGTC	GATGCTAGGGAATTCGATCTCCAGAGAAACCAATGAGTTT	ATCCGAGCTCTGCAGGATGGCAGGAAGATCTCTAGGTCTC
14	49440220	49440470	36	5.96738	GATGCTAGGGAATTCGATTCAAAACAGTGGCATTCAGAA	ATCCGAGCTCTGCAGGATCCCCACAACATTTTCCTGTT		ATCCGAGCTCTGCAGGATCCCCTACAACATTTTCCTGTT
11	15695040	15695430	37	5.90422	GATGCTAGGGAATTCGATACAGGCTCACTGTAGGGCTG	ATCCGAGCTCTGCAGGATCATGTGCAGGTATCACGTCA
5	81518500	81518990	38	5.88905	GATGCTAGGGAATTCGATACAATCATCATTTGGTGGGC	ATCCGAGCTCTGCAGGATTGCAATCTTTGAAGGCAACA
16	65043720	65043870	39	5.8631	GATGCTAGGGAATTCGATGCATATTGCTTGGAGGGAAA	ATCCGAGCTCTGCAGGATTTTCCAGCAGGAGTCCAAAT
