# Supplementary material for: Comprehensive identification and analysis of human accelerated regulatory DNA
Source: HighWire-hosted journal article supplement (doi:10.1101/gr.192591.115), 2015-06-23
Supplement: Supplemental_Text.docx [file Supplemental_Text.docx]

**Supplementary Text**

**Segmenting merged DHS**

To segment long, merged DHS that may represent multiple regulatory elements, for every 5th base pair in the genome we counted the number of cell types that contained a DHS at that base. Based on this information, we identified local minima in the number of cell types, and partitioned a DHS at the local minima if the minima was less than half of the previous maximum, and if the number of cell types again increased by at least 5 (Supplementary Fig. 7). This resulted in an increase from the initial 2,026,055 merged DHS to the final 2,093,197 DHS, so the vast majority of DHS in the analysis were not partitioned. 8,929 of the final 113,577 conserved DHS were part of a larger DHS that got partitioned, and 68 of the 524 haDHS were partitioned.

**Calibrating the False discovery rate for conserved and human accelerated DHS**

To evaluate whether the FDR was appropriately calibrated in the phyloP tests, we randomly sampled regions throughout the genome from the same size distribution as the final set of DHS. We applied the same filtering strategy to this set, arriving at a final set of 47,317 simulated DHS and ran the same phyloP tests. Of the randomly sampled regions, 1.1% were called as conserved at the same p value threshold (0.00242) for the real DHS, demonstrating that our estimate of a 1% FDR for the conserved DHS is accurate. Similarly, we found that simulated DHS were called as conserved and human accelerated at 5.7% the rate that DHS from the real data set were. These data indicated that our estimated FDRs were well calibrated.

**Testing for acceleration relative to the neutral rate**

We applied a non-parametric permutation strategy to determine if the human branch in each haDHS was evolving more rapidly than the estimated neutral rate. For each haDHS we first used phyloFit to fit a phylogenetic model to the alignment of the haDHS. Next, we sampled contiguous regions of the alignment of the same size as the haDHS from the local neutral region (the 50kb block of sequence surrounding the haDHS) 103 times, each time fitting a phylogenetic model to the alignment. haDHS with a substitution rate greater than 95% of the null distribution were determined to be evolving more rapidly than the neutral rate.

**GC-biased gene conversion**

We determined whether each mutation in our consDHS and haDHS was from weak to strong or other (strong to weak, weak to weak, or strong to strong) based on the human ancestral sequence inferred as part of the 6 primate EPO alignment. We computed an empirical null distribution to non-parametrically assess whether there was an enrichment of weak to strong mutations in haDHS. To this end, we randomly sampled 524 conserved (but not human accelerated) DHS 104 times and determined how often a sample contained more than the proportion of weak to strong mutations seen in the haDHS. This analysis yielded significant evidence of GC-BGC, with a higher proportion of weak to strong mutations in haDHS compared to the conserved non-accelerated DHS samples (0.45 and 0.38, respectively, permutation *P* = 0.006; Supplementary Fig. 3a). Capra et al. (2013) recently wrote a software package, phastBias, that identifies discrete regions of the genome undergoing GC-biased gene conversion (Capra et al. 2013). We found that 51 haDHS overlapped these regions. To reevaluate the effect of GC-BGC after removing haDHS that overlap phastBias regions, we repeated the sampling procedure by randomly selecting 473 conserved DHS each replicate, and determined how often samples had a higher proportion of weak to strong substitutions that in the non GC-biased haDHS. We found that removing the 51 haDHS (9.7%) that overlap regions subject to GC-BGC (Capra et al. 2013) eliminates the observed weak to strong bias (permutation *P* = 0.32; Supplementary Fig. 3a), indicating a small but significant effect of GC-BGC in our data.

**Human-macaque divergence**

We wanted to test the hypothesis that increased local mutation rates could explain the rate acceleration in haDHS. To accomplish this, we calculated human-macaque divergence in the surrounding 4kb of sequence for each haDHS in order to approximate the neutral mutation rate. To do this, we obtained an alignment and used the same filtering strategy we used for the neutral regions in the LRT tests. We calculated divergence using the phyloFit program in the PHAST package (Hubisz et al. 2011). We found that only the 51 haDHS that overlap GC-biased elements show a significant increase in human-macaque divergence relative to conserved non-accelerated DHS, indicating that mutation rate heterogeneity is not a major factor in non GC-BGC haDHS (Supplementary Fig. 3b). In contrast, the entire set of HAEs showed increased divergence relative to other highly conserved elements (Supplementary Fig. 3b).

**Population genetics analyses**

To perform population genetic analyses on our DHS, we downloaded the phase1 integrated release data from the 1000 genomes project (The 1000 Genomes Project Consortium 2012). We used the ancestral and derived calls in these data to create an ancestralized human reference genome in which any polymorphic base that is derived in the reference was replaced with the ancestral base. This ancestralized reference therefore still had any fixed substitutions on the human lineage, but allowed to us to identify 1000 genomes variants that occurred in ancestral CpG sites. We filtered any variants that occurred within CpG sites in the ancestralized reference as well as any variants called only in the high coverage exome data, so as not to bias rare variant detection in regions with different coverage, which has been shown to be an issue in previous applications of the 1000 genomes data (Green and Ewing 2013).

Because α can be negative due to mildly deleterious segregating sites (Eyre-Walker 2006), when calculating α we filtered any 1000 genome variants below a 10% derived allele frequency in all combined African populations. We filtered repeat masked sequence from all sites, and additionally filtered exons, DHS, and phastCons elements from the neutral class of sites.

To determine how our estimates of α might be affected by demographic history, we simulated 104 haDHS and surrounding neutral regions (324 bp; the average length of all haDHS; 4000bp neutral regions) using the program ms (Hudson 2002) and a demographic model used previously (Tennessen et al. 2012). To this we added an outgroup to model divergence from chimpanzees with the switch -ej 8.207934. We repeated these simulations with different mutation rate heterogeneity parameters, which describe how quickly the simulated haDHS evolved compared to the neutral region. Note, we did not simulate selection and thus the mutation rate parameter should affect polymorphism and divergence equally. The following is the ms command line used to simulate an haDHS evolving at the neutral mutation rate (1e-08):

ms 493 1000 -I 3 492 0 1 -t 0.0947376 -r 0.0944452 324 -n 1 58.002735978 -n 2 70.041039672 -eg 0 1 482.46 -eg 0 2 570.18 -em 0 1 2 0.7310 -em 0 2 1 0.7310 -eg 0.006997264 1 0 -eg 0.006997264 2 89.7668 -en 0.006997264 1 1.98002736 -en 0.031463748 2 0.141176471 -en 0.03146375 2 0.254582763 -em 0.03146375 1 2 4.386 -em 0.03146375 2 1 4.386 -em 0.069767442 1 2 0 -em 0.069767442 2 1 0 -ej 0.069767442 2 1 -en 0.069767442 1 1.98002736 -en 0.20246238 1 1 -ej 8.207934 3 1

We calculated nucleotide diversity as , where n is the number of chromosomes and is the frequency of the major allele for th *i*th segregating site, *S,* and divided by the number of bases considered in each DHS. For comparison we calculated π in four fold degenerate sites that we defined using NCBI-called reading frames with single base phyloP scores less than zero. We also calculated π in the set of previously described HAEs and phastCons elements. Coverage at each variant was obtained from ftp://ftp.1000genomes.ebi.ac.uk/vol1/ftp/release/20110521/supporting/ ALL.wgs.project_consensus_vqsr2b.20101123.snps.low_coverage.sites.vcf.gz. We used PhyloP scores that we previously calculated without the human lineage(Fu et al.). We normalized all estimates of π by the human-macaque divergence estimated previously (see section “human-macaque divergence”), since we have shown that divergence varies substantially across loci, and will thus significantly effect estimates of π. We calculated nucleotide diversity separately for each population, as well as in aggregate with all populations combined.

**Luciferase assays**

We obtained Human DNA from Novagen and chimpanzee DNA from Coriell (S003487), and amplified both human and chimpanzee alleles for each haDHS using the following PCR reaction: 200uM dNTPs, 10uM forward primer, 10uM reverse primer, 3% DMSO, 20ng DNA, 1u/50uL phusion polymerase (NEB) and 1x phusion buffer with an annealing temperature of 63 degrees Celsius. Primers were designed using BatchPrimer3 v1.0 (You et al. 2008) (Supplementary Table 7) and then run through In-Silico PCR downloaded from the UCSC Genome Browser to ensure they would produce one unique amplicon. PCR fragments were cloned into a pGL3-promoter (Promega) backbone with minimal promoter using the In-Fusion HD Cloning Kit from Clontech and transformed into Stellar competent cells provided with the kit. We obtained this pGL3-promoter backbone from Bing Wren’s lab, which was modified to include an EcoRV restriction site downstream of the luciferase gene for cloning.

SKNMC and IMR90 cells were grown in EMEM with 10% FBS and Penicillin-Streptomycin. Cells were grown in T175 flasks with media changes every two days until 80-85% confluency. Cells were counted and replated onto 96-well plates at 30,000 cells per well (SKNMC) or 6500 cells per well (IMR90) and allowed to settle for 24 hours. Luciferase assays were performed following the Dual-Luciferase Reporter Assay System protocol (Promega). Cells were transfected with 500ng firefly luciferase plasmid with reporter construct, and 10ng plasmid with *Renilla* luciferase. After 24 hours cells were lysed and luciferase activity was measured using a Perkin Elmer VICTOR 3 V 1420 Multi-label counter with injector. Raw firefly luciferase values were normalized by dividing by the *Renilla* luciferase values for each well.

A close inspection of the IMR90 data revealed a relationship between the raw *Renilla* luciferase value and the firefly/ *Renilla* ratio (Supplementary Fig. 8). As *Renilla* expression approaches zero, and the reading approaches that of an empty well without any transfected plasmid, the ratio of firefly to *Renilla* will approach one, which will lead to false positives. We therefore filtered any replicates in the IMR90 data in which the *Renilla* reading was less than 2500 relative light units. Any haDHS with less than two replicates, or any plates in which the negative control had less than two remaining replicates were filtered.

**Supplementary Tables Text**

**Tables**

**Table 1: Cell types used**. This table contains information about all of the cell types used in the DHS data.

**Table 2: haDHS.** This table contains information about all of the haDHS identified in this study.

**Table 3: Transgenic mouse assay results**. Results for all 18 transgenic mouse assays, including published and novel. The results column contains the sequence ID in the vista enhancer browser, and the numbers in parentheses indicate how many embryos were positive for staining at that particular region.

**Table 4: Luciferase data.** This table contains expression values for all of the replicates from the luciferase experiments, as well as computed p values for each experiment

**Table 5: GO Results.** All GO results from the WebGestault server for both conserved DHS and haDHS target genes.

**Table 6: Second set of haDHS.** This set of haDHS was derived only from DHS that are proximal to enhancer histone modifications from the same cell type.

**Table 7: Primers.** This table contains primers for each haDHS tested in the luciferase assays.

References

Capra JA, Hubisz MJ, Kostka D, Pollard KS, Siepel A. 2013. A Model-Based Analysis of GC-Biased Gene Conversion in the Human and Chimpanzee Genomes ed. G. Coop. *PLoS Genet* **9**: e1003684.

Eyre-Walker A. 2006. The genomic rate of adaptive evolution. *Trends Ecol Evol (Amst)* **21**: 569–575.

Fu W, Gittelman RM, Bamshad MJ, Akey JM. Characteristics of neutral and deleterious protein-coding variation among individuals and populations. *American journal of human genetics*.

Green P, Ewing B. 2013. Comment on "Evidence of abundant purifying selection in humans for recently acquired regulatory functions". *Science* **340**: 682–682.

Hubisz MJ, Pollard KS, Siepel A. 2011. PHAST and RPHAST: phylogenetic analysis with space/time models. *Brief Bioinformatics* **12**: 41–51.

Hudson RR. 2002. Generating samples under a Wright-Fisher neutral model of genetic variation. *Bioinformatics* **18**: 337–338.

Tennessen JA, Bigham AW, O'Connor TD, Fu W, Kenny EE, Gravel S, McGee S, Do R, Liu X, Jun G, et al. 2012. Evolution and functional impact of rare coding variation from deep sequencing of human exomes. *Science* **337**: 64–69.

The 1000 Genomes Project Consortium. 2012. An integrated map of genetic variation from 1,092 human genomes. *Nature* **491**: 56–65.

You FM, Huo N, Gu YQ, Luo M-C, Ma Y, Hane D, Lazo GR, Dvorak J, Anderson OD. 2008. BatchPrimer3: a high throughput web application for PCR and sequencing primer design. *BMC Bioinformatics* **9**: 253.
